# Supplementary material for: Anticancer, Antioxidant Activities and Molecular Docking Study of Thiazolidine -4-one and Thiadiazol Derivatives
Source: Research Square preprint supplement (doi:10.21203/rs.3.rs-1200559/v1), 2022-01-03
Supplement: Supplementary file 1 [file 06ba01a1fce10936aa366554.pdf]

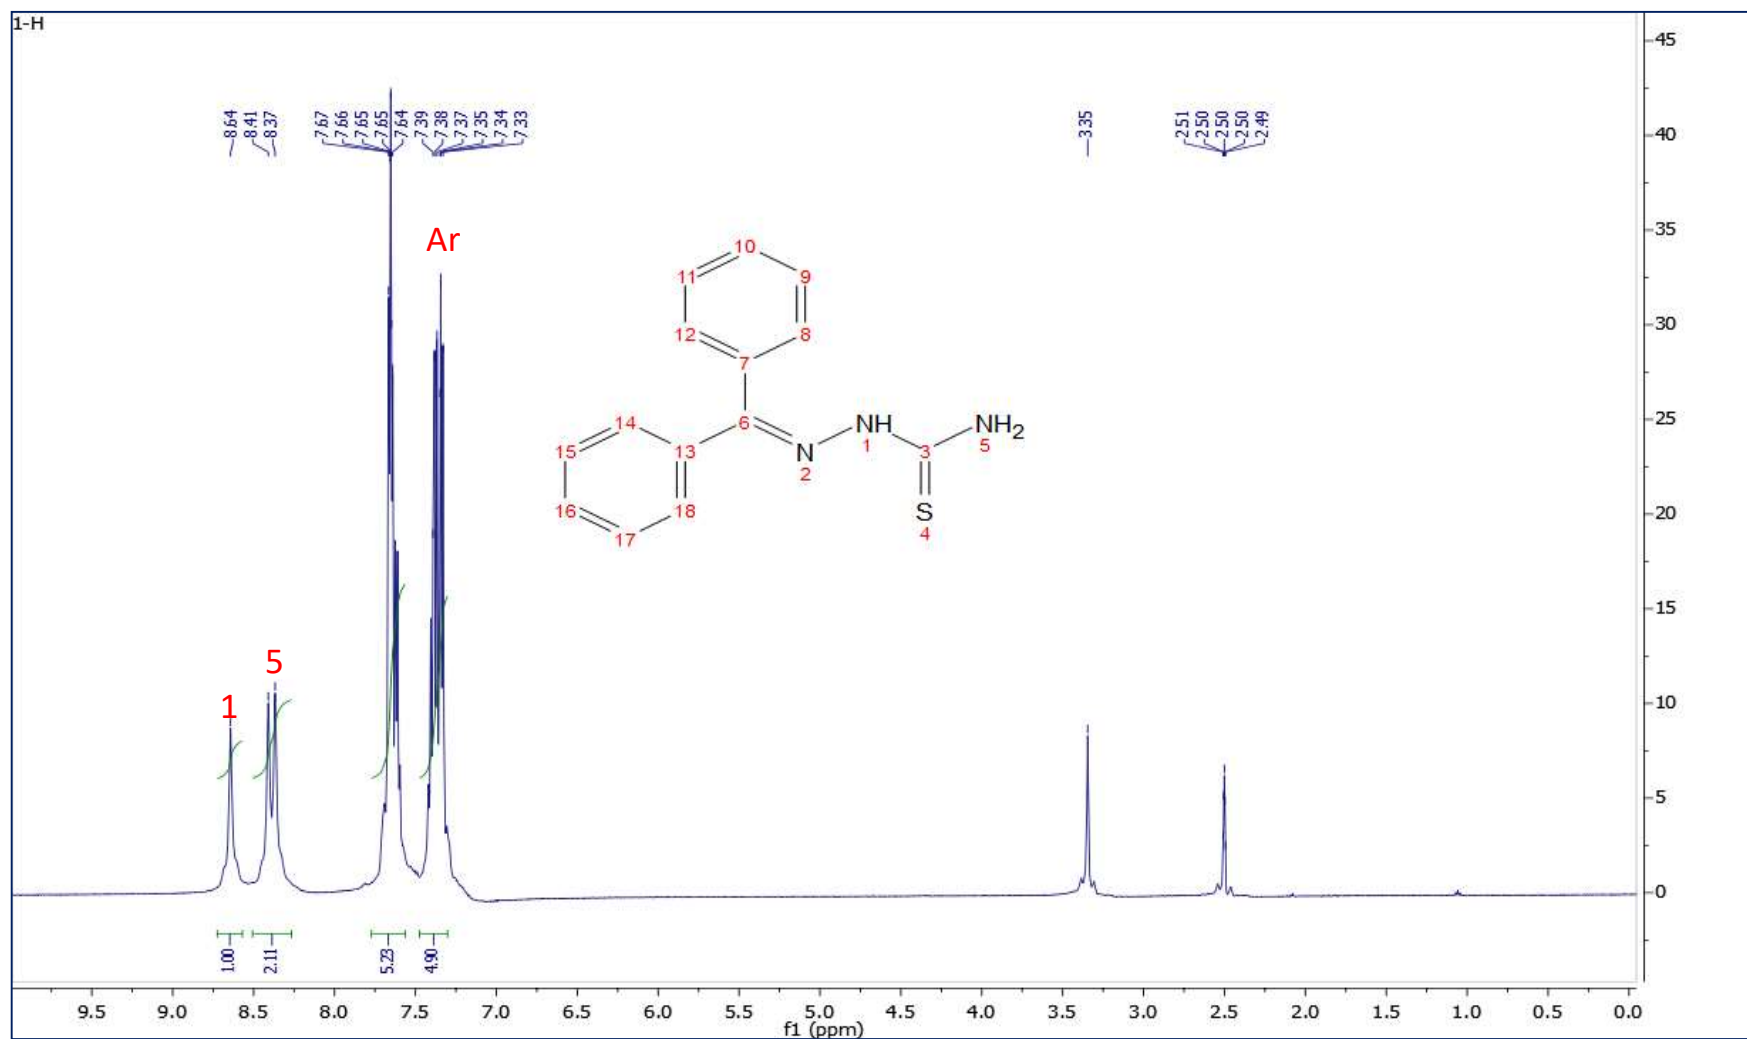

**1H NMR spectrum of compound 1**

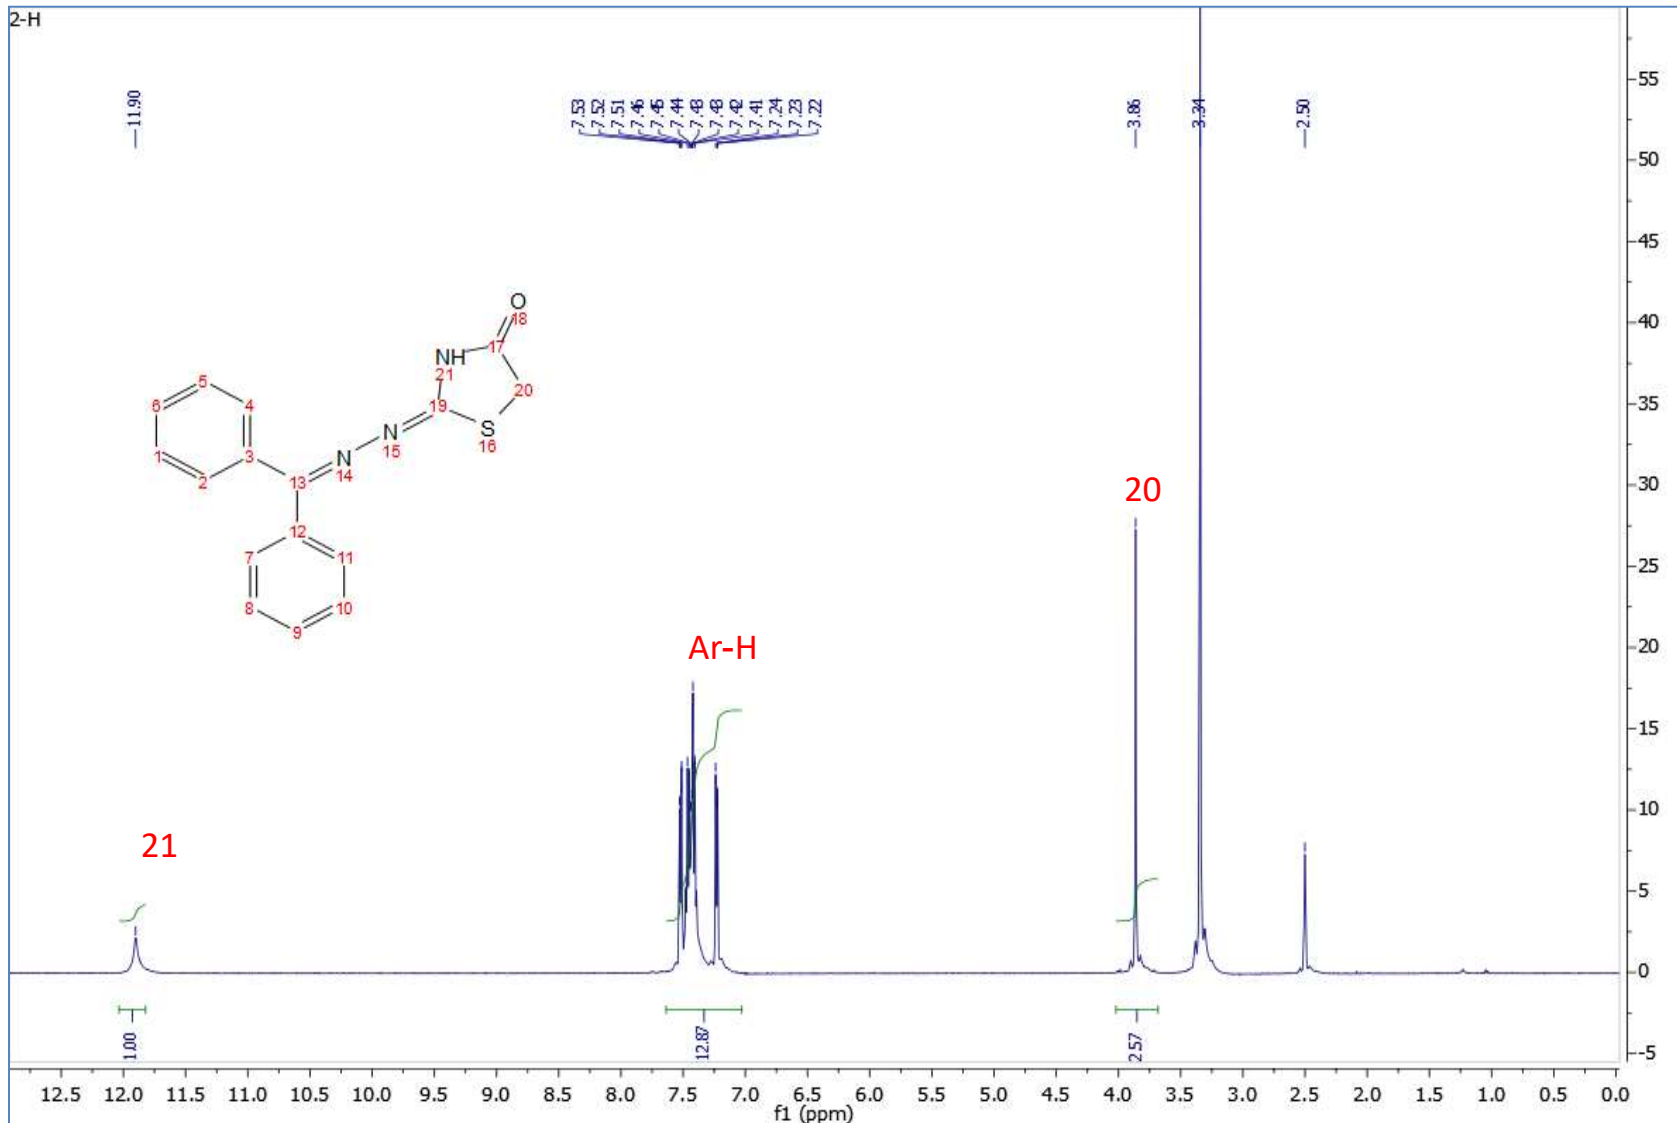

1HNMR spectrum of compound 2

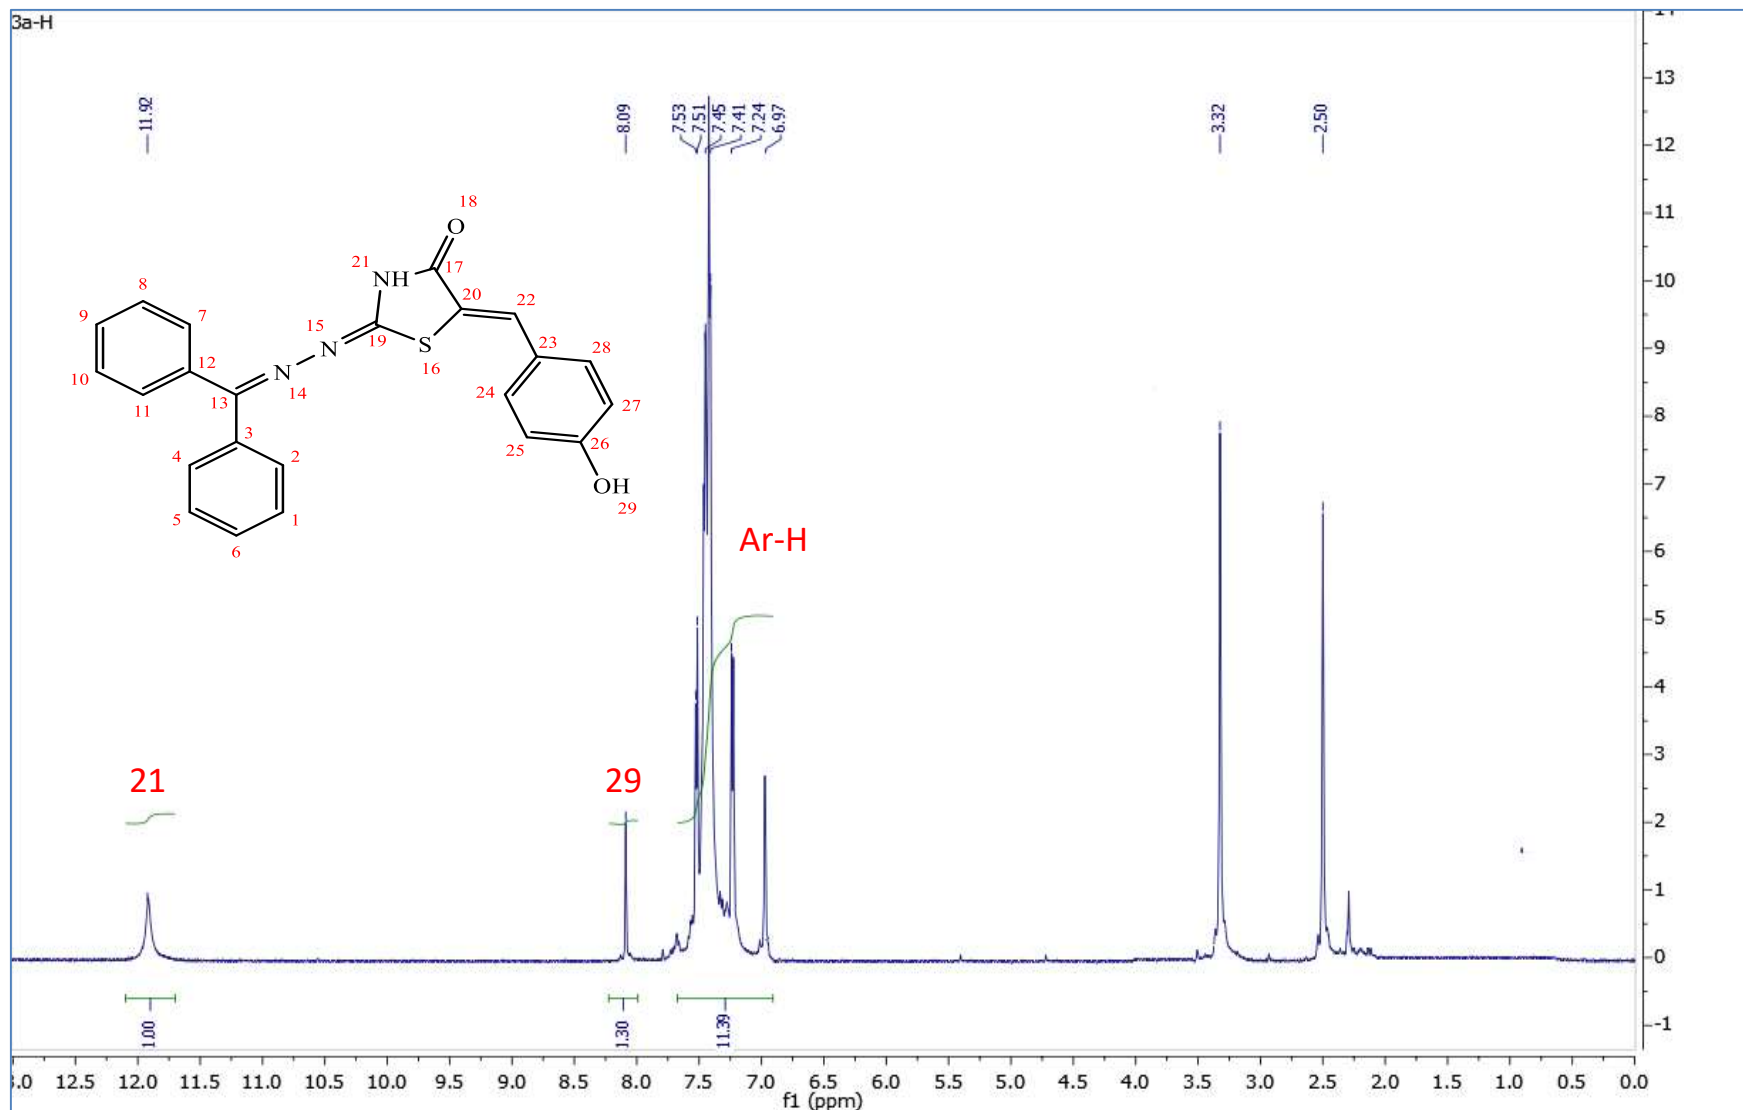

**1H NMR spectrum of compound 3a**

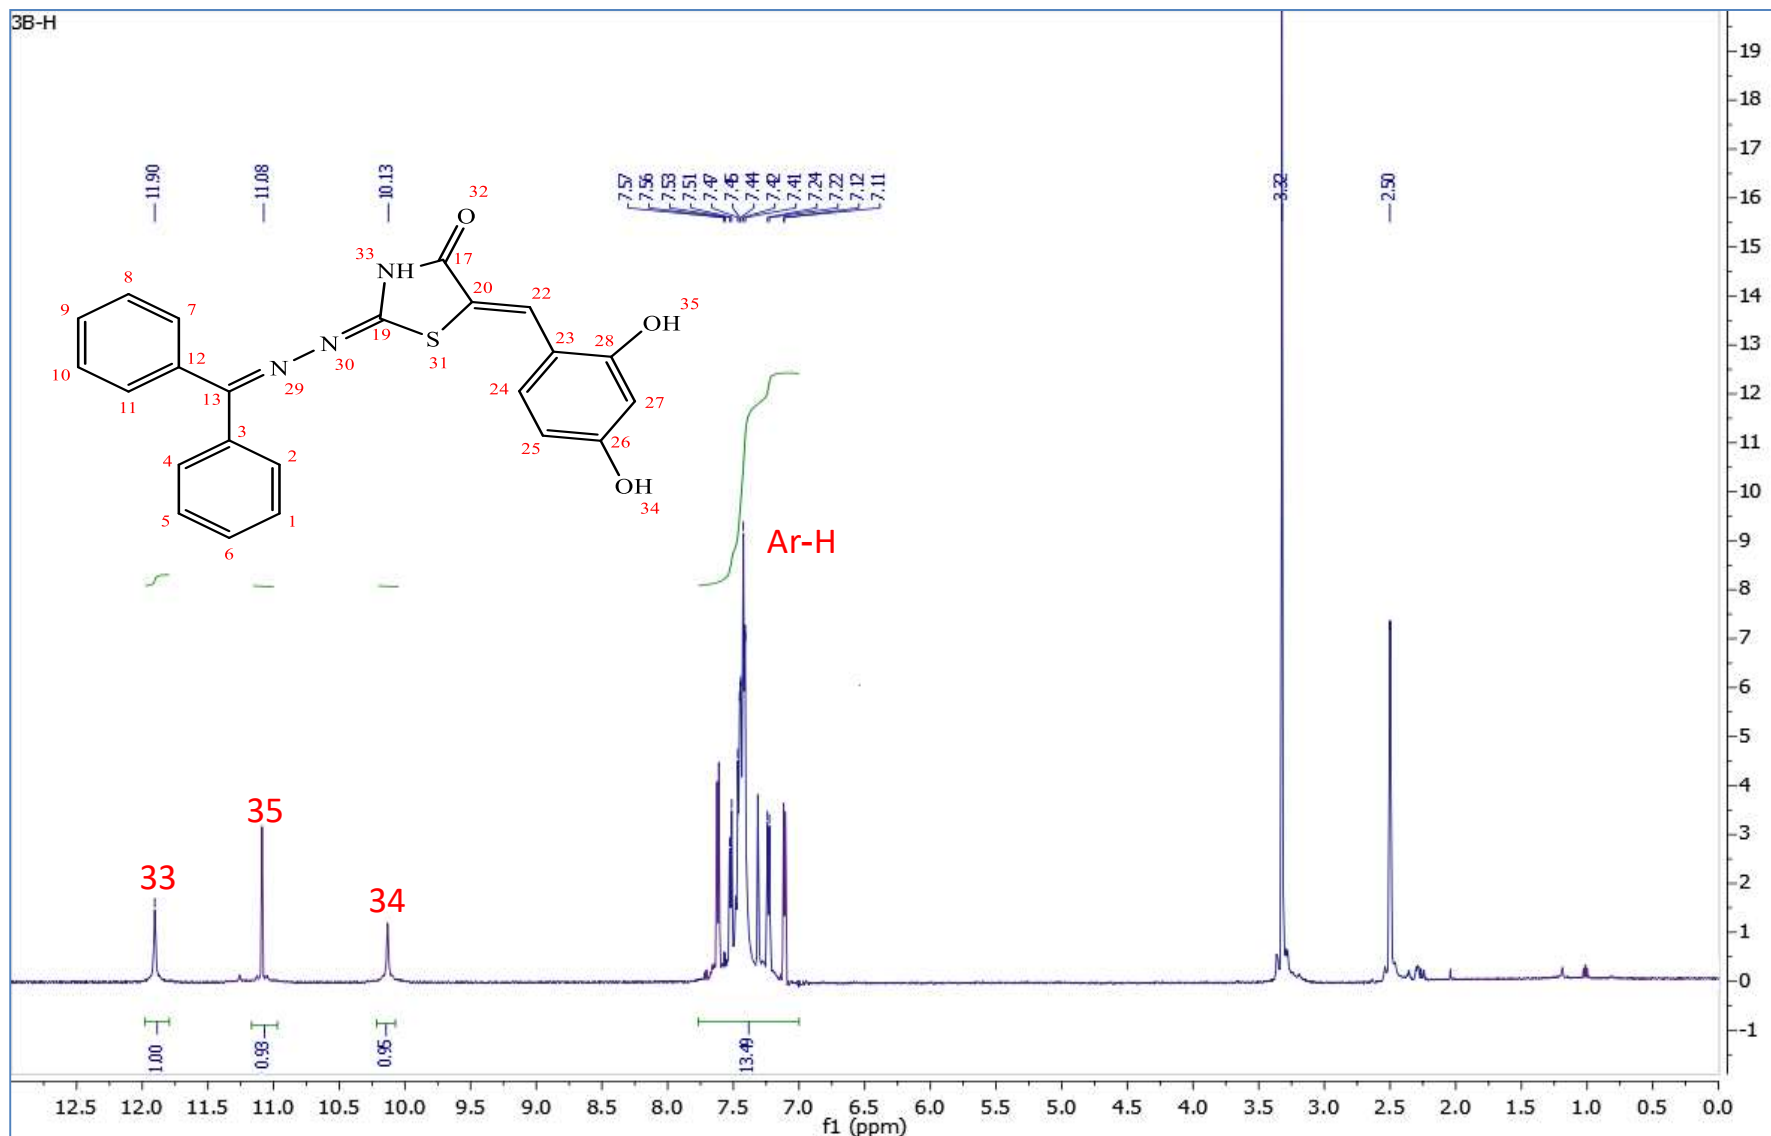

**<sup>1</sup>H NMR spectrum of compound 3b**

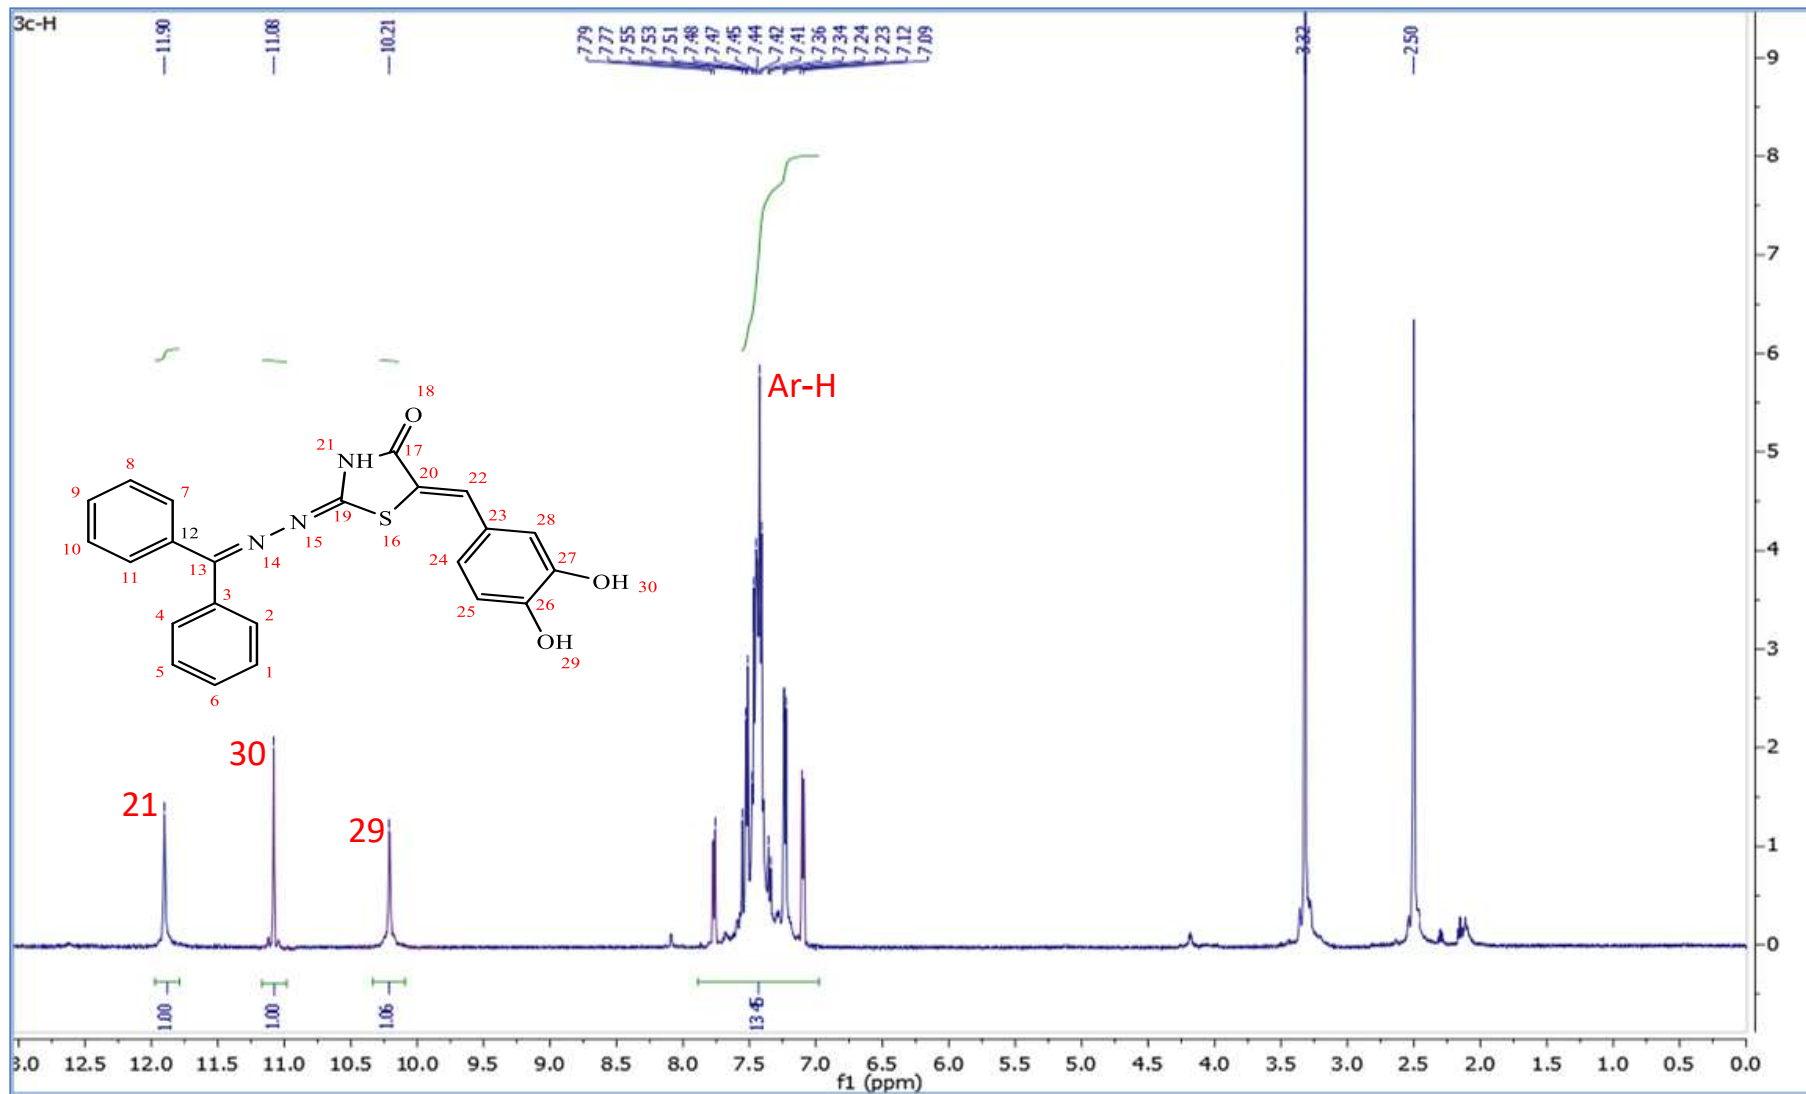

1H NMR spectrum of compound 3c

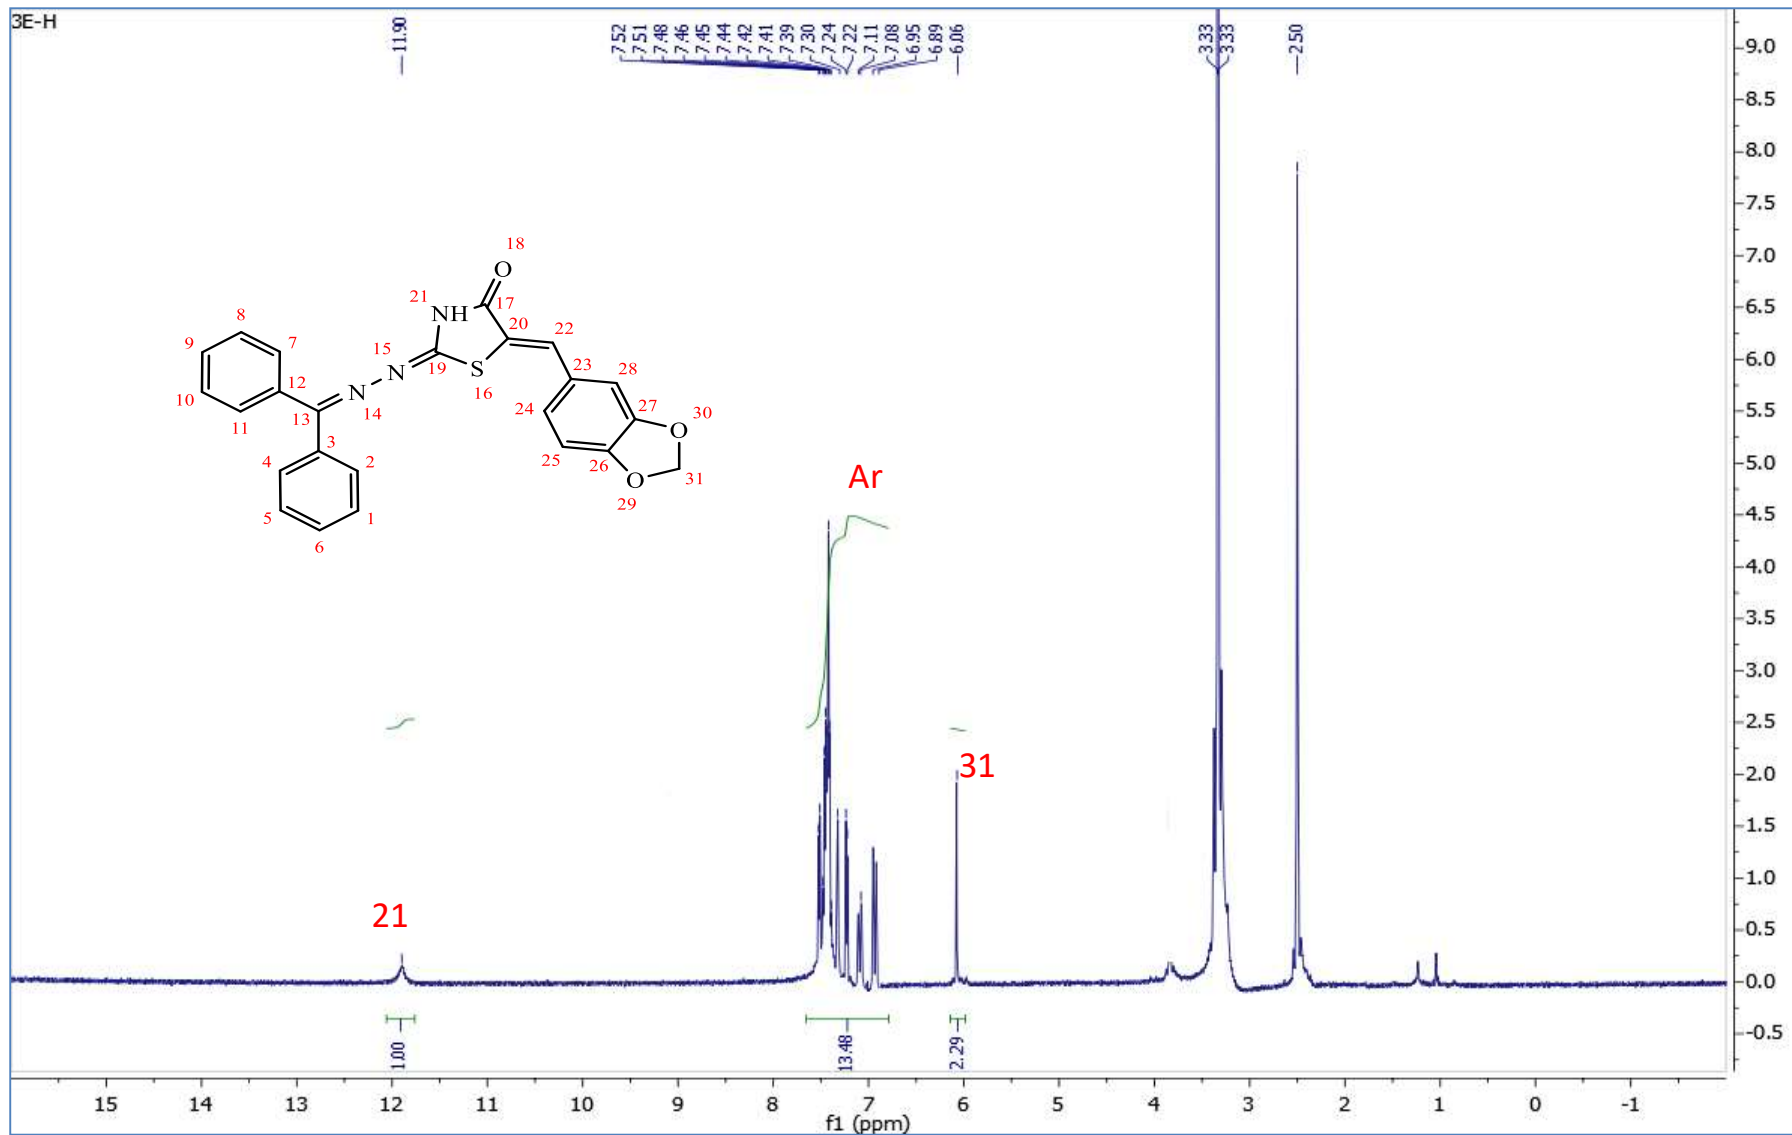

1H NMR spectrum of compound 3d

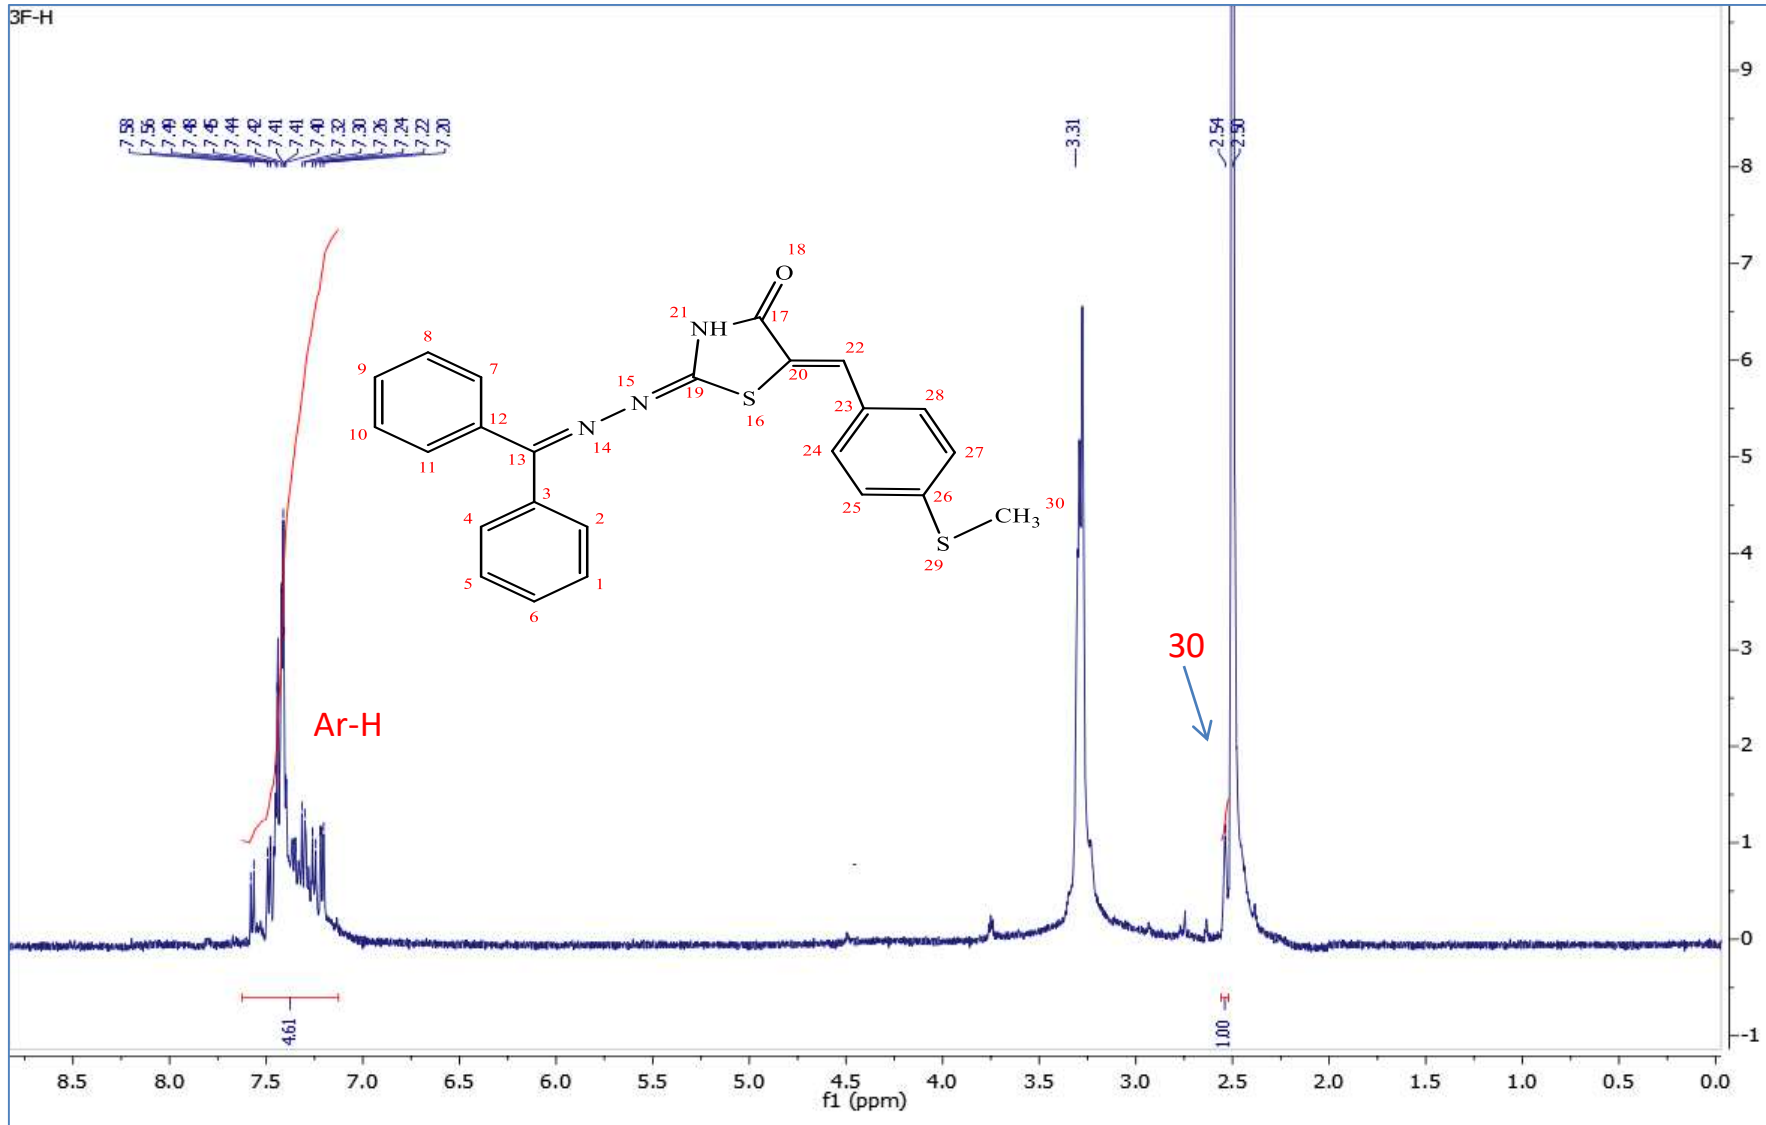

**1H NMR spectrum of compound 3e**

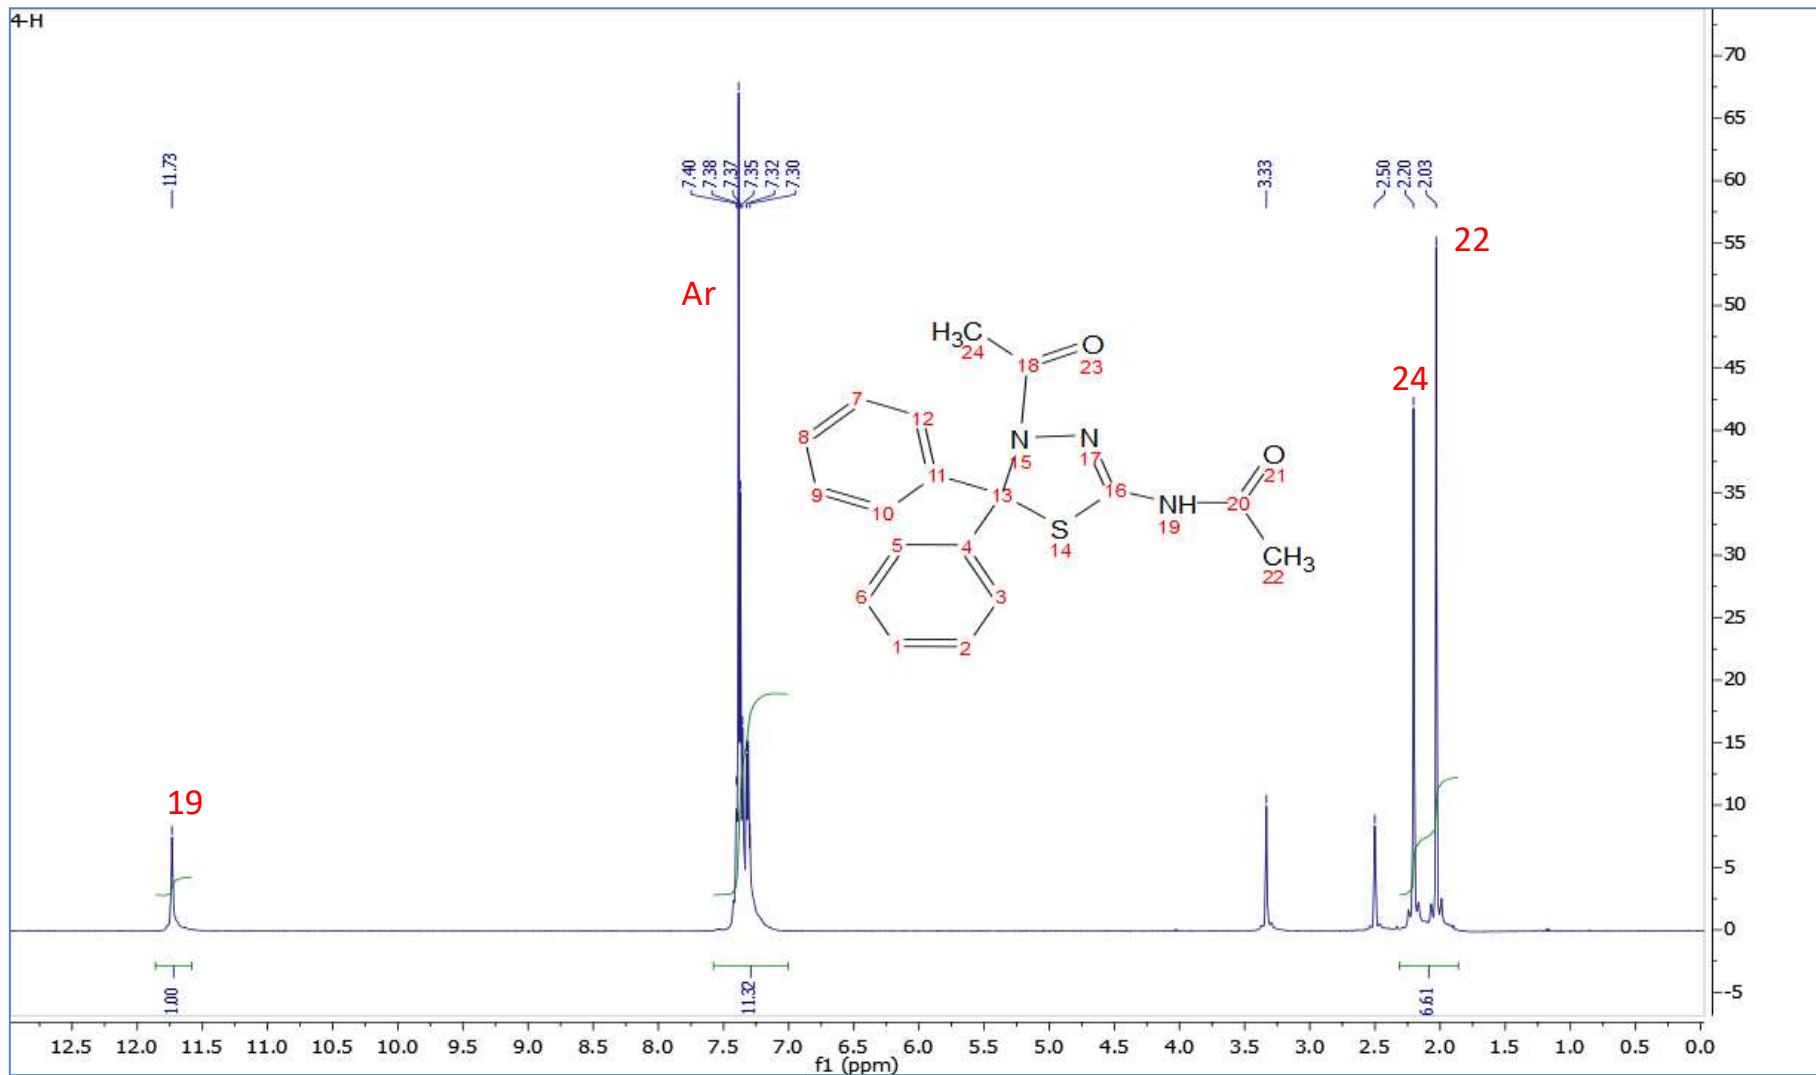

1H NMR spectrum of compound 4

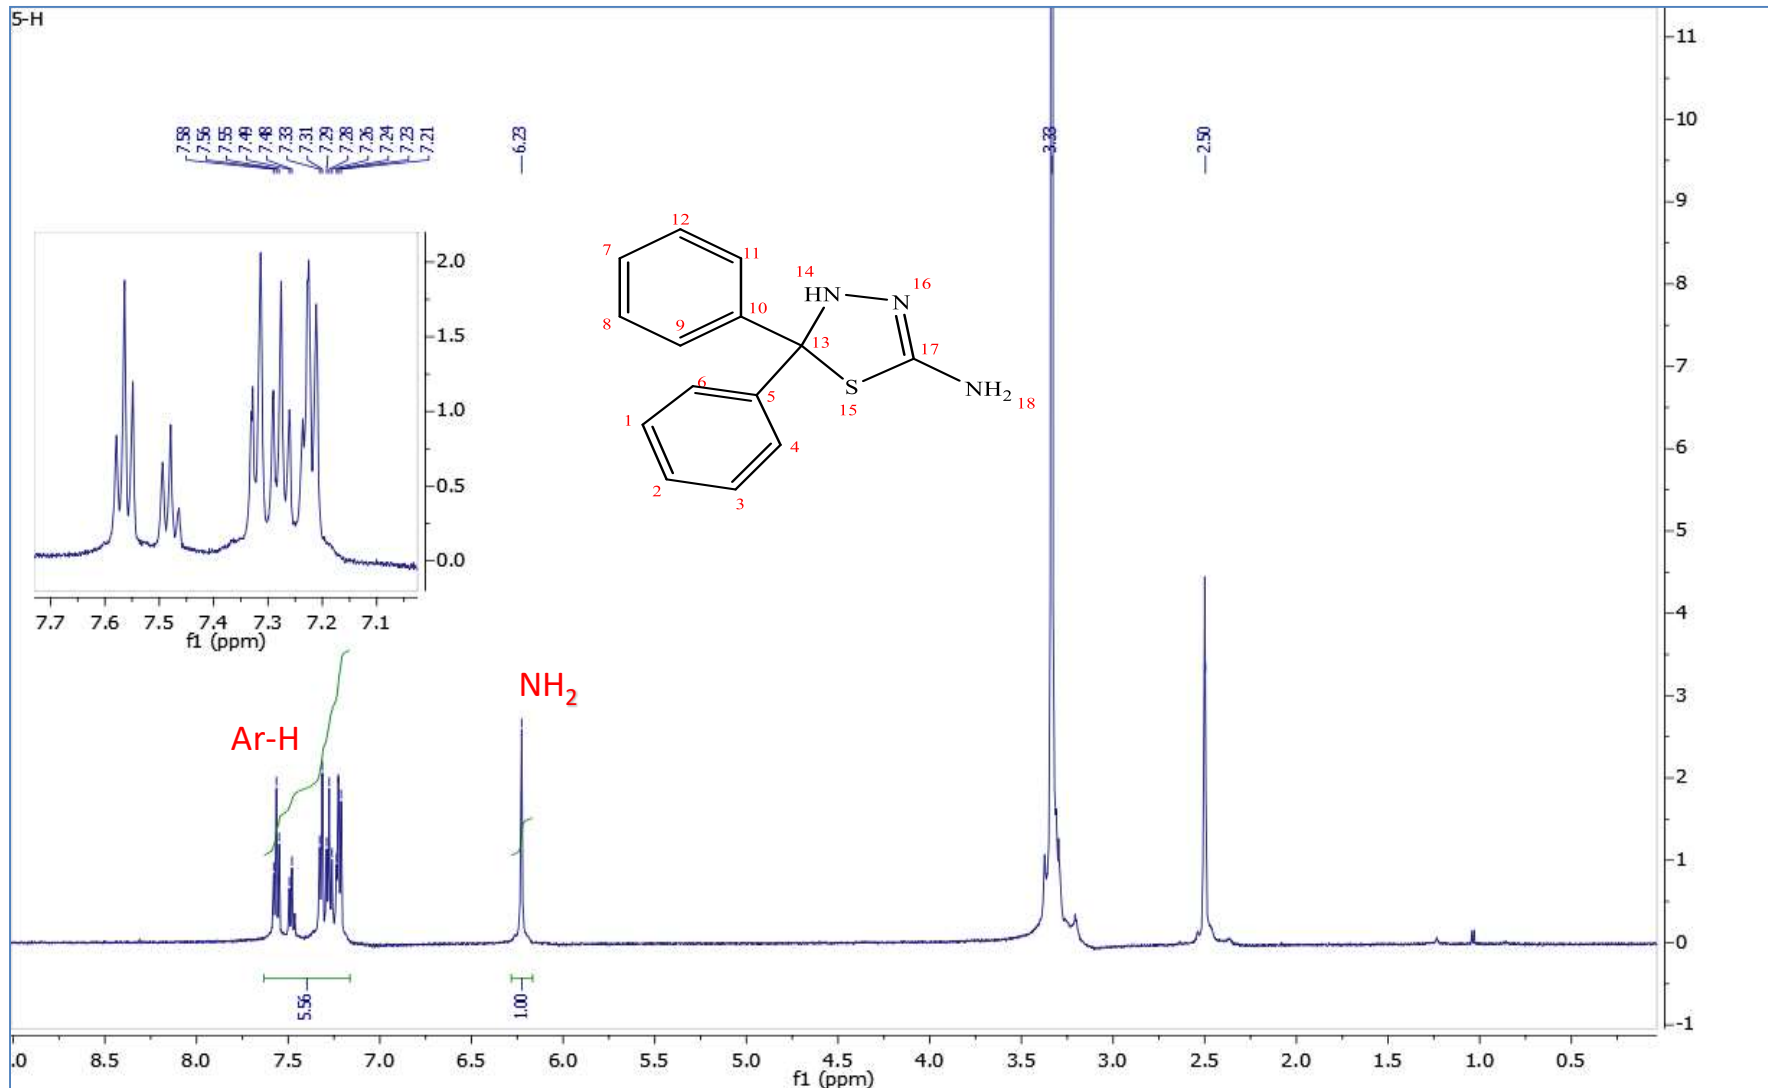

1H NMR spectrum of compound 5

6a-H

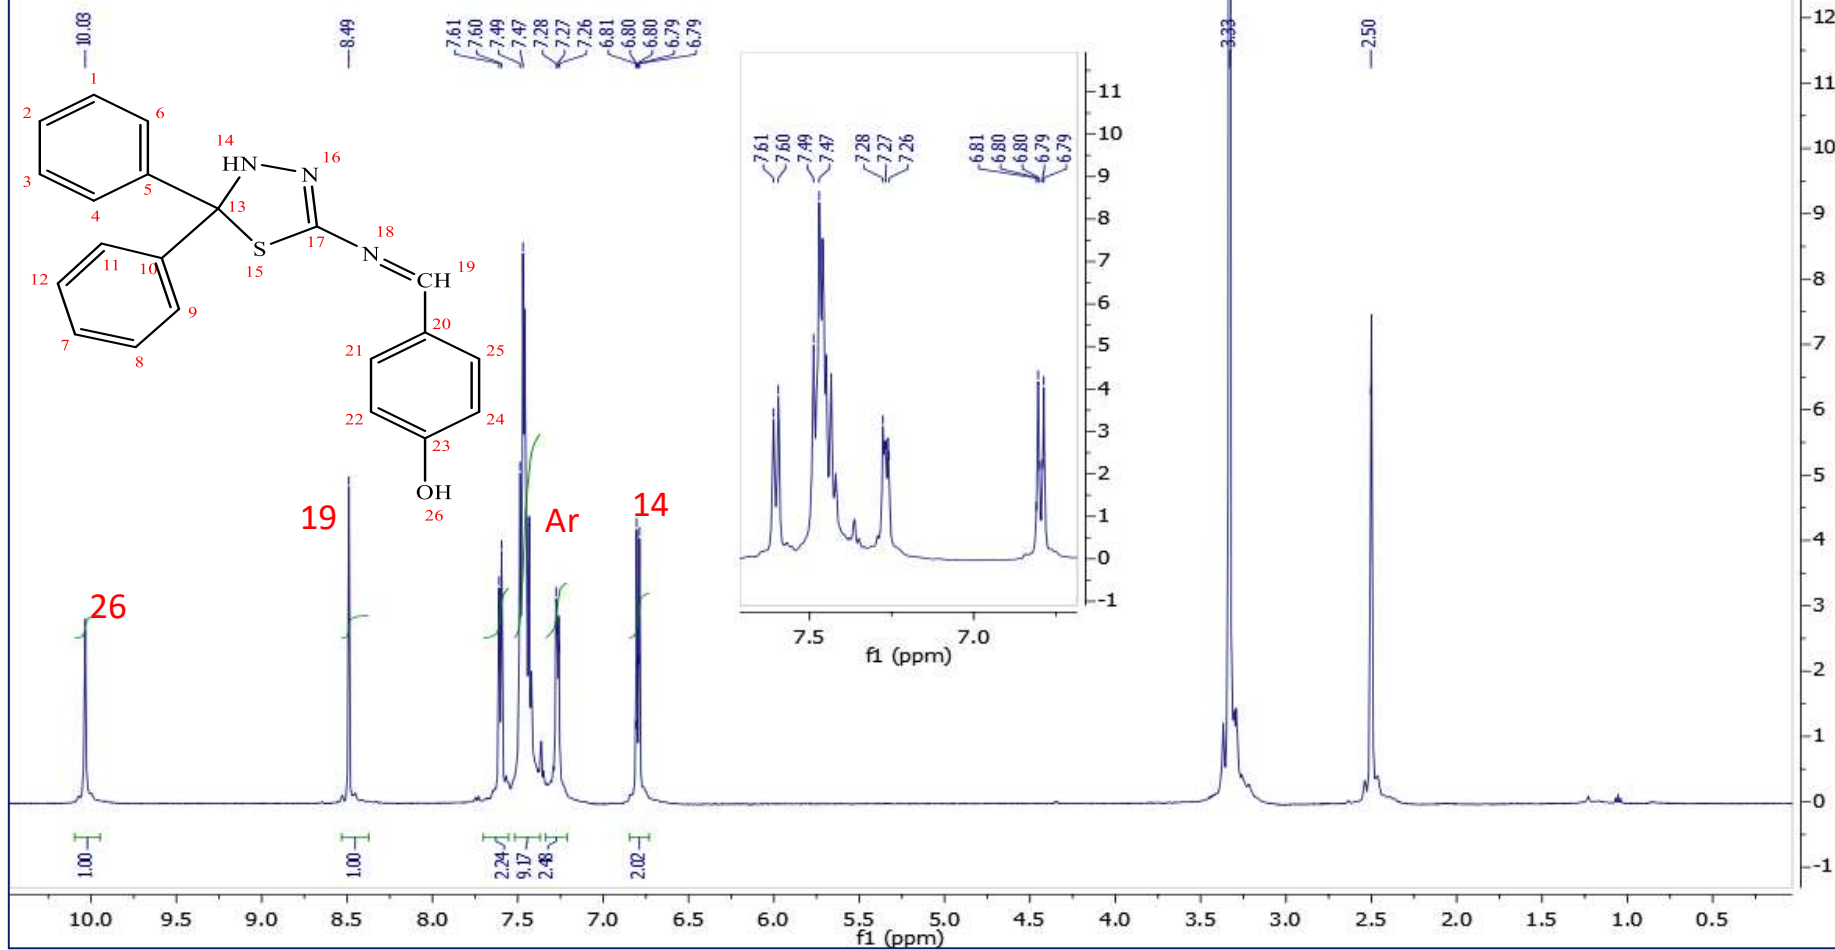

**1H NMR spectrum of compound 6a**

6b-H

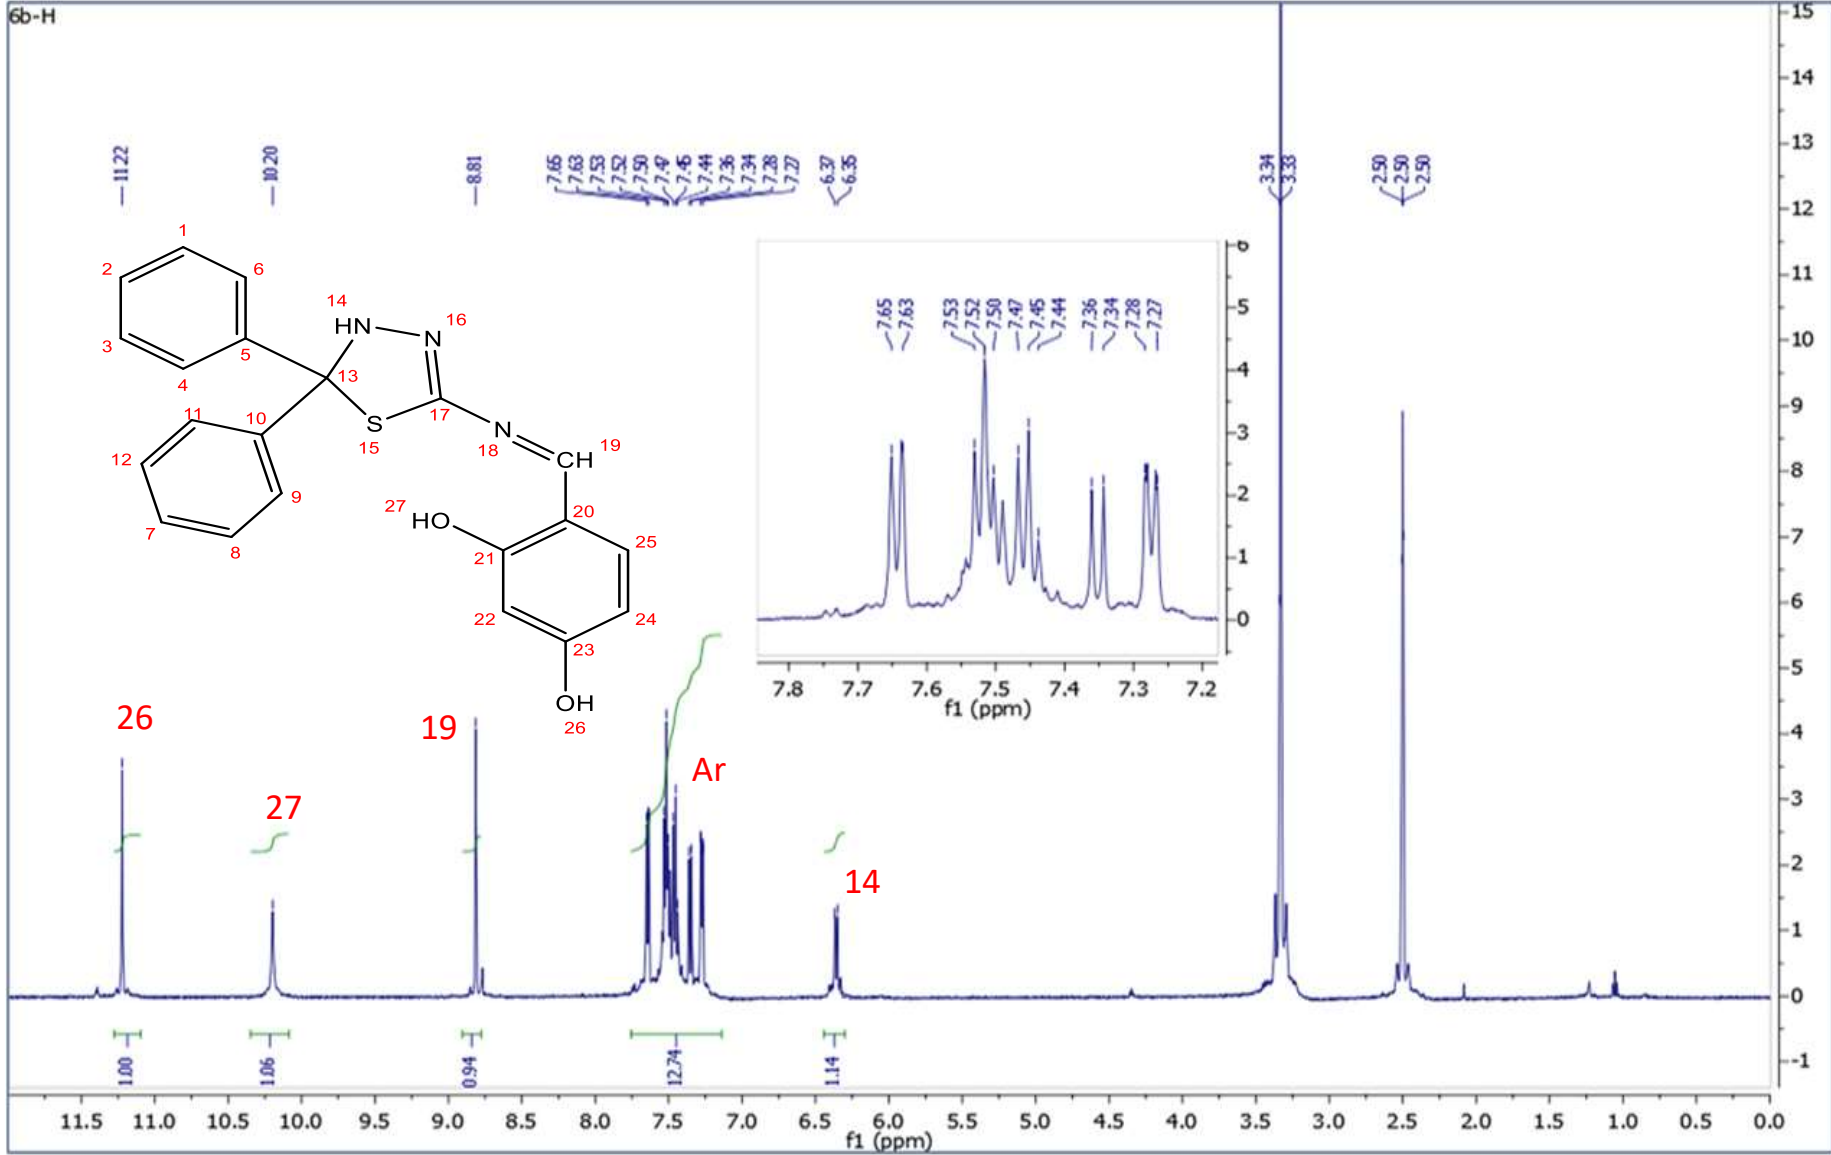

**<sup>1</sup>H NMR spectrum of compound 6b**
