# Supplementary material for: Anticancer, Antioxidant Activities and Molecular Docking Study of Thiazolidine -4-one and Thiadiazol Derivatives
Source: Research Square preprint supplement (doi:10.21203/rs.3.rs-1200559/v1), 2022-01-03
Supplement: Supplementary file 2 [file 348c07e22d73753e951e34c4.pdf]

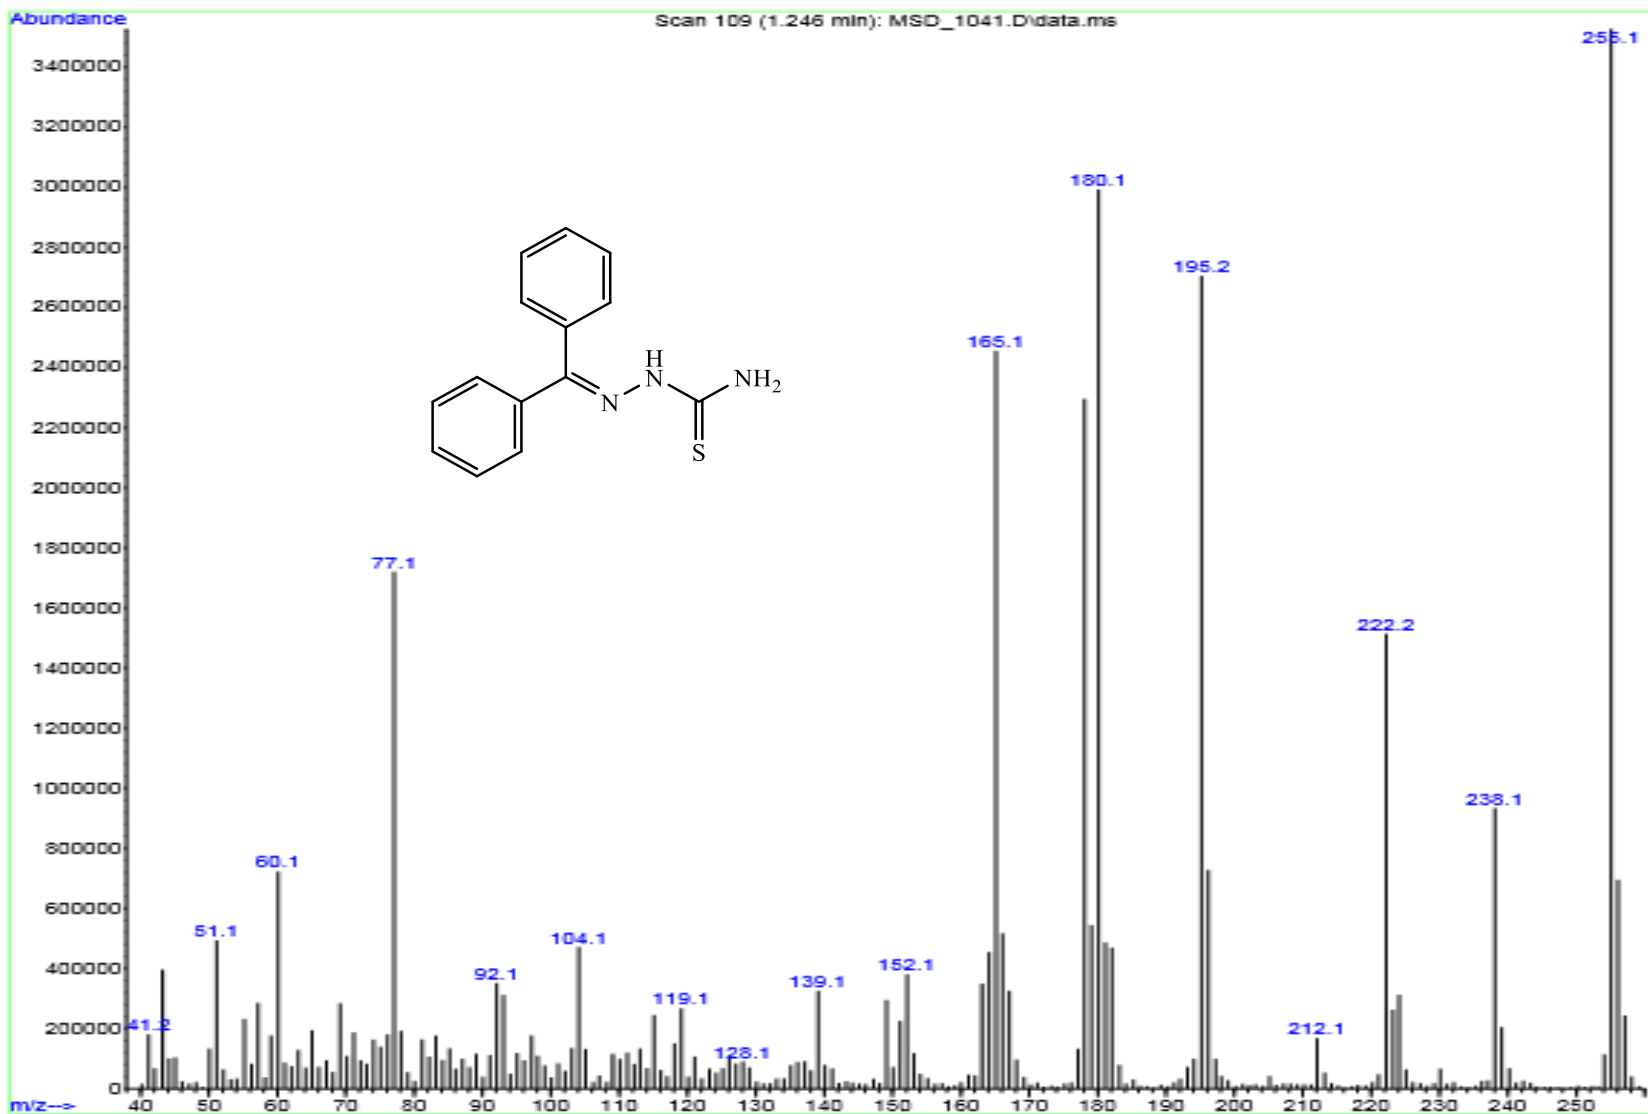

Mass spectrum of compound 1

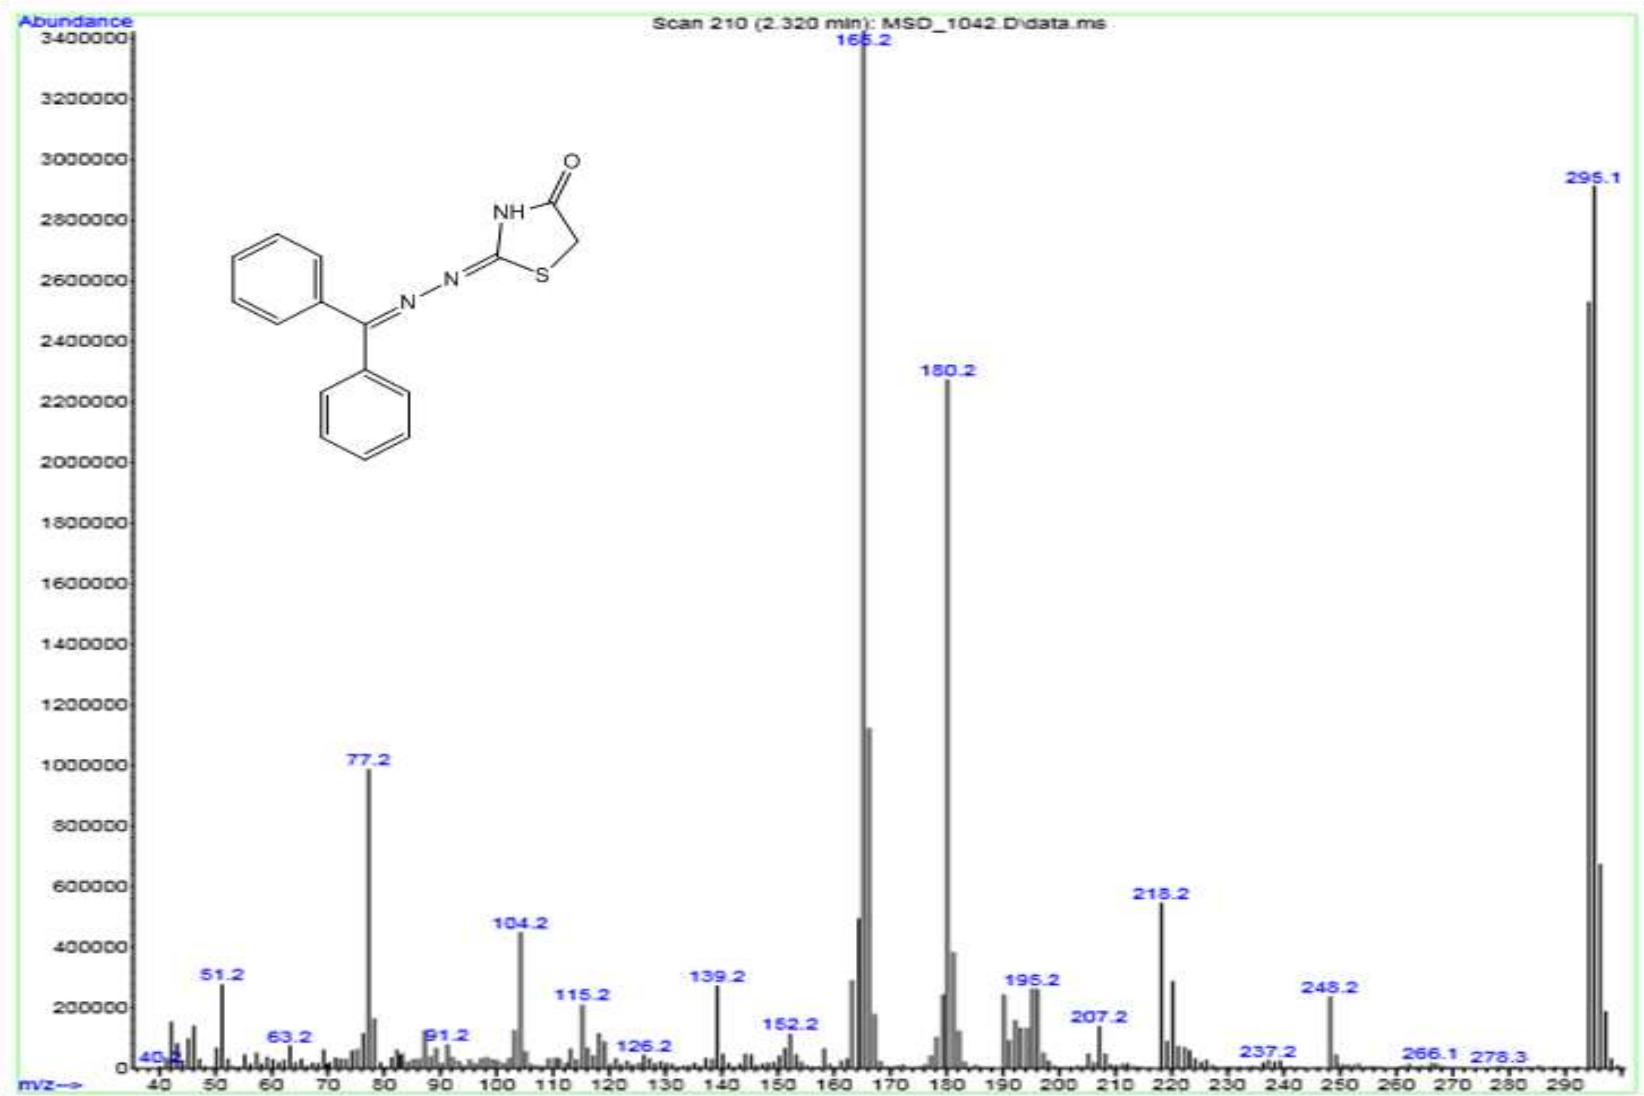

Mass spectrum of compound 2

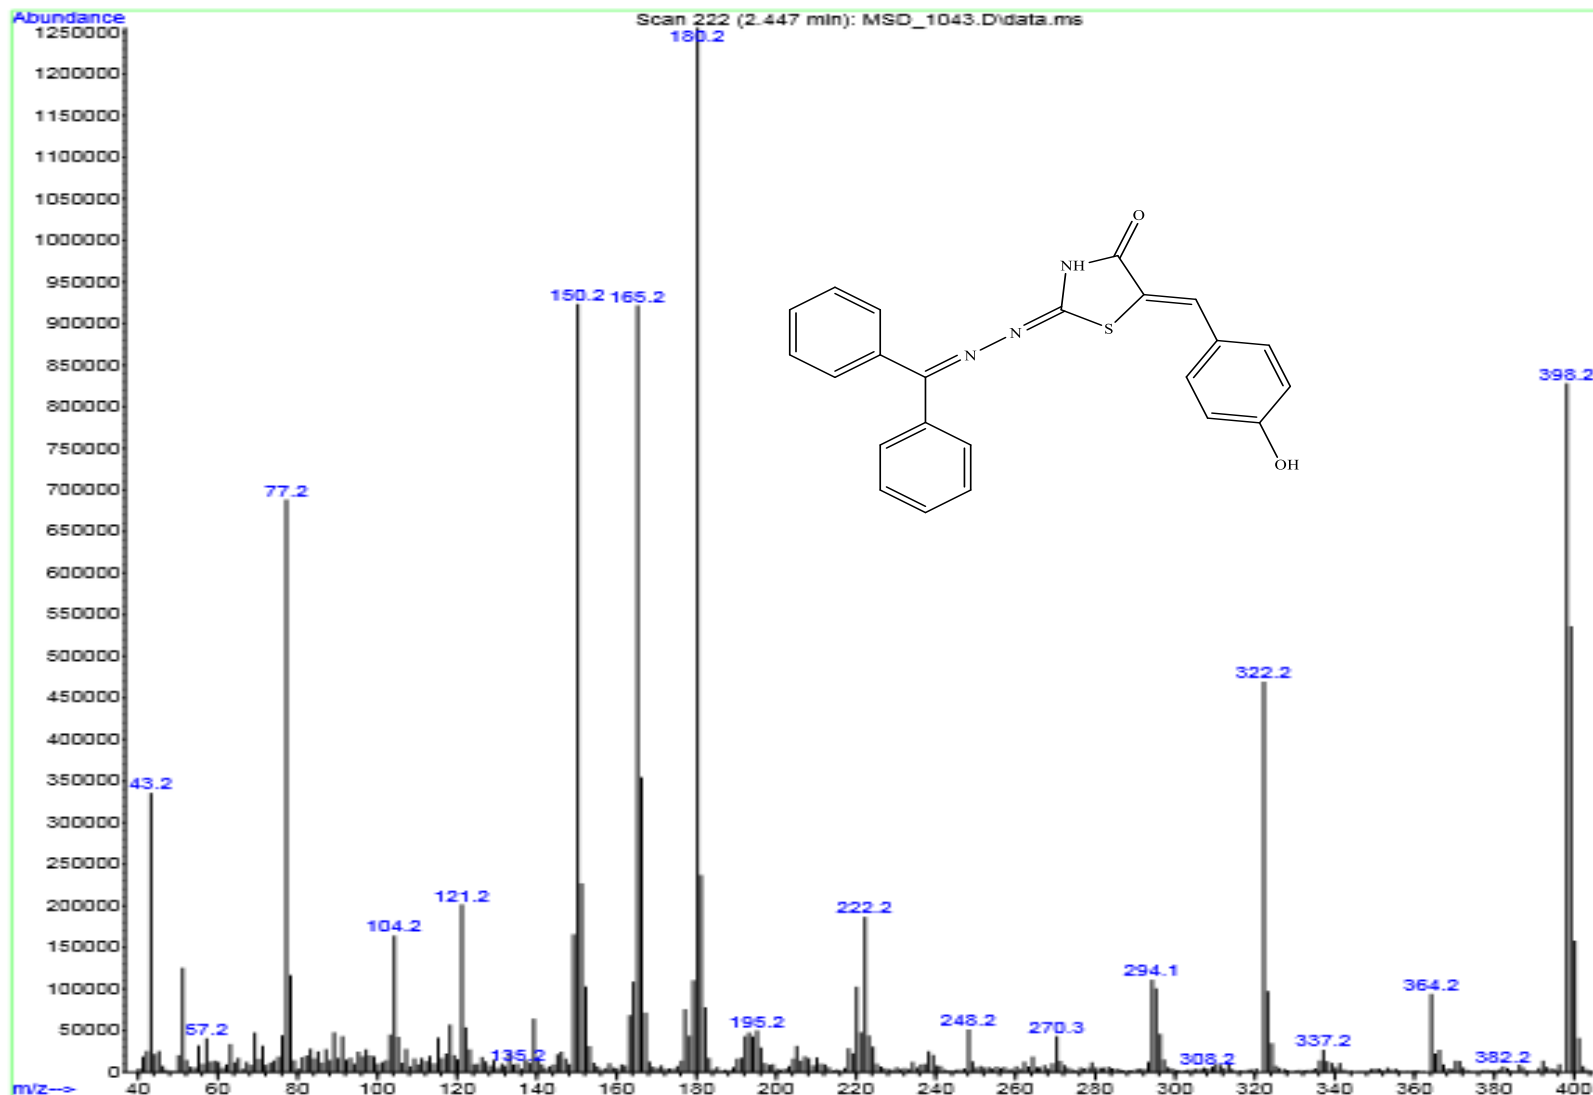

Mass spectrum of compound 3a

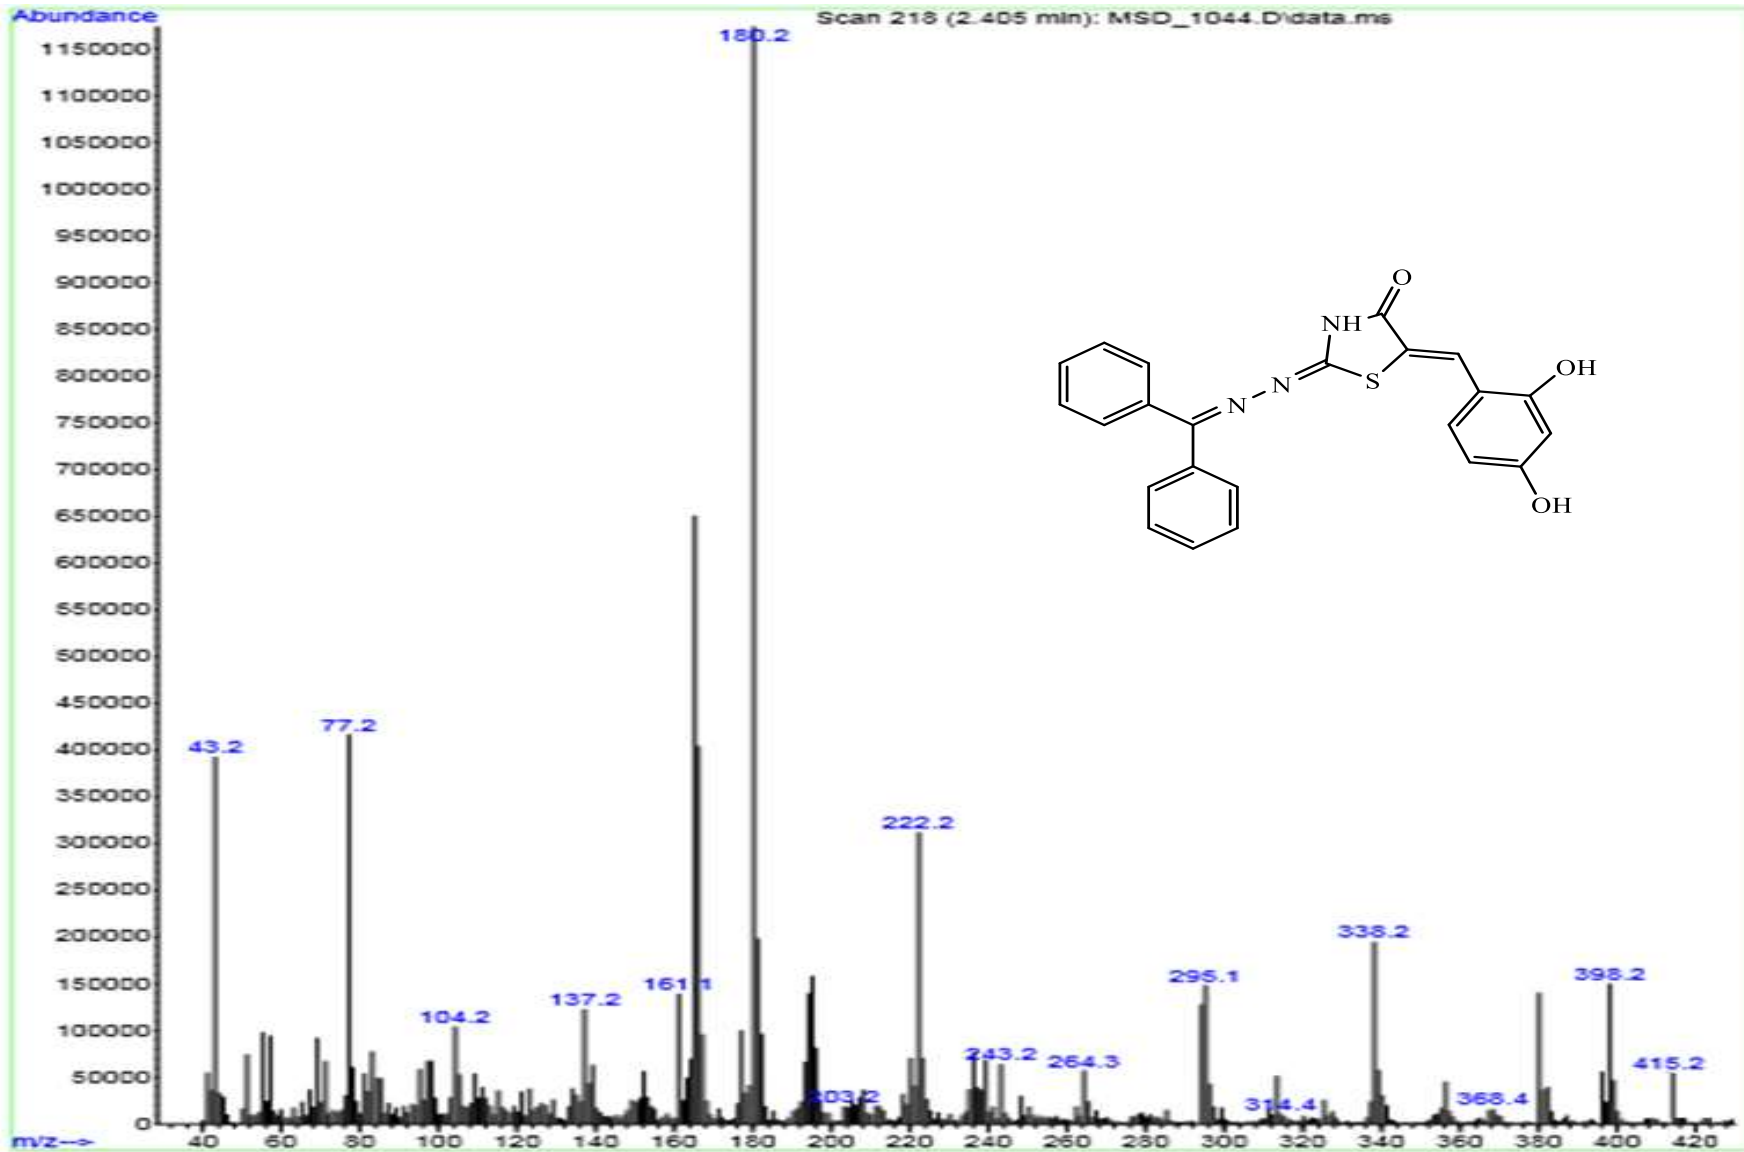

Mass spectrum of compound 3b

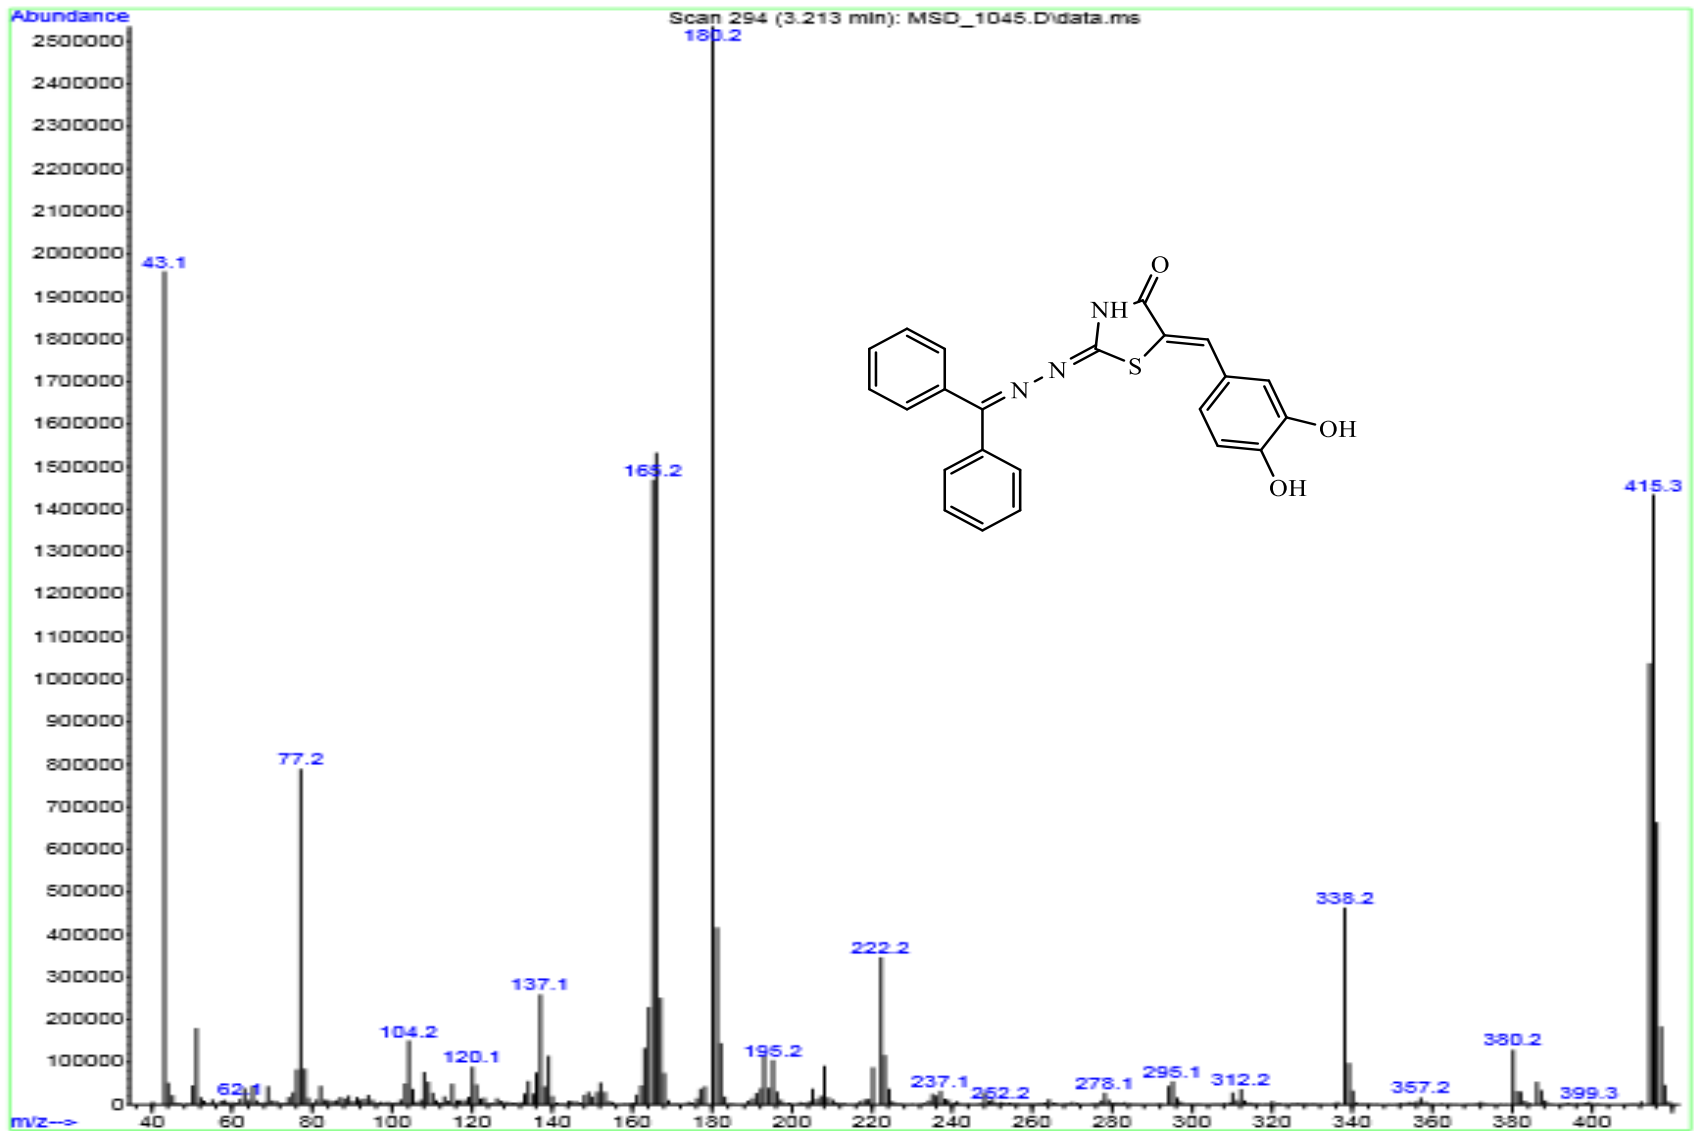

Mass spectrum of compound 3c

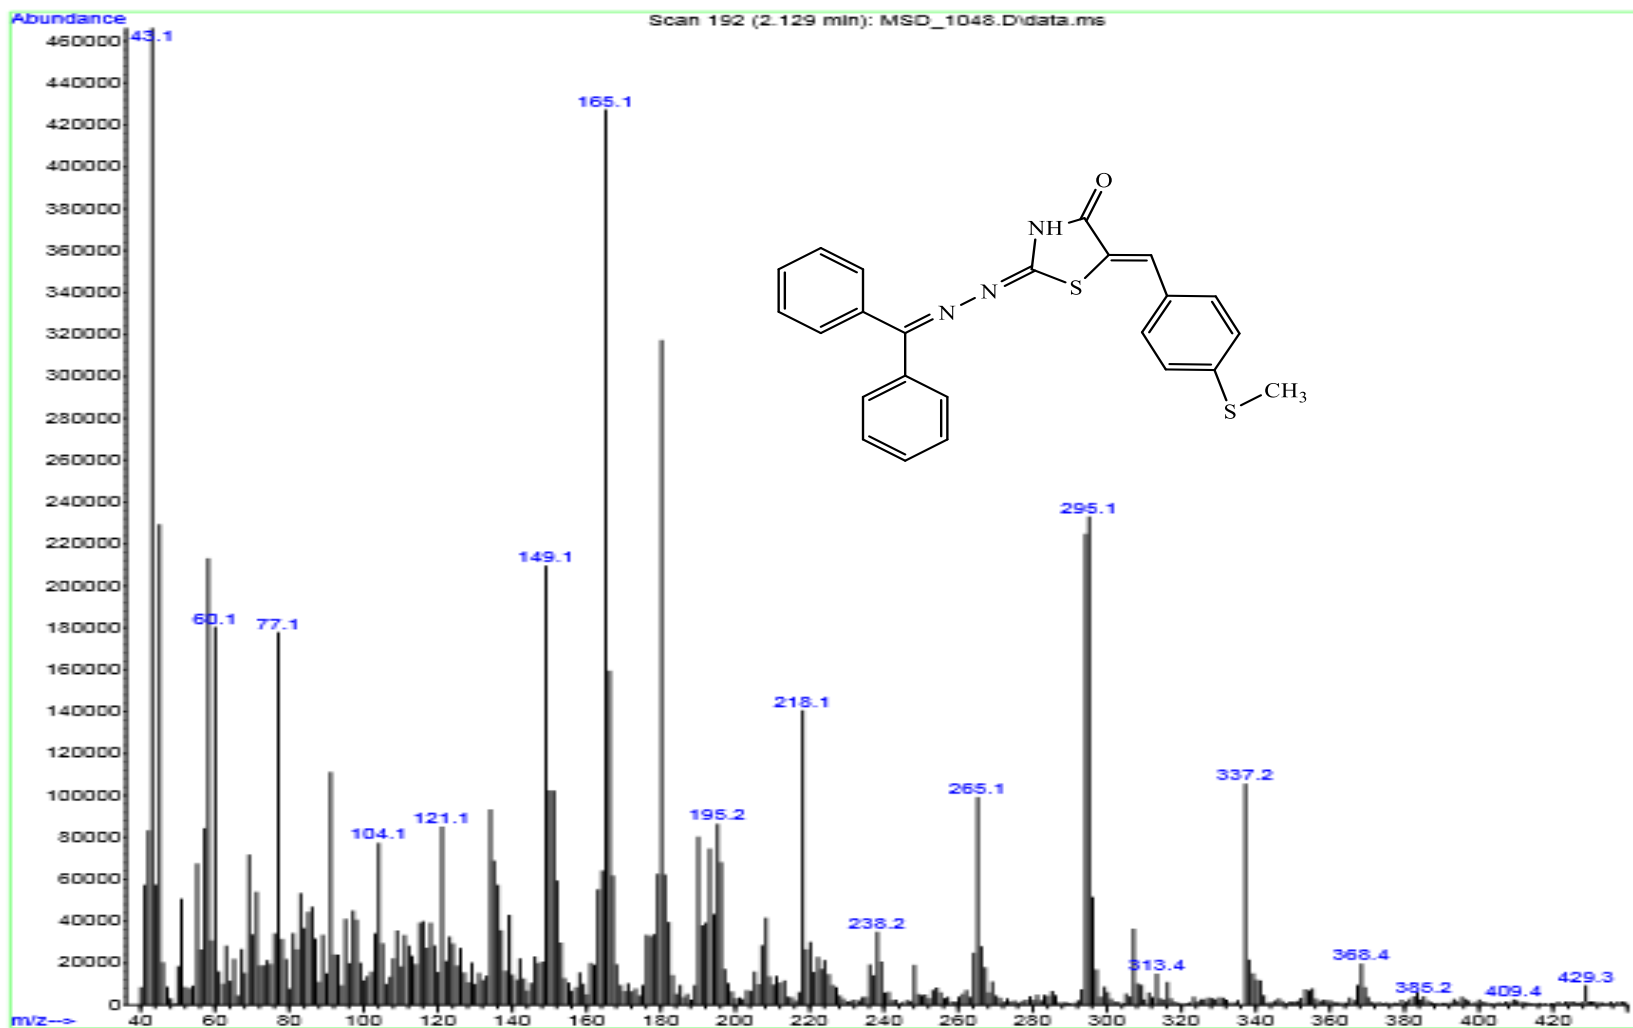

Mass spectrum of compound 3d

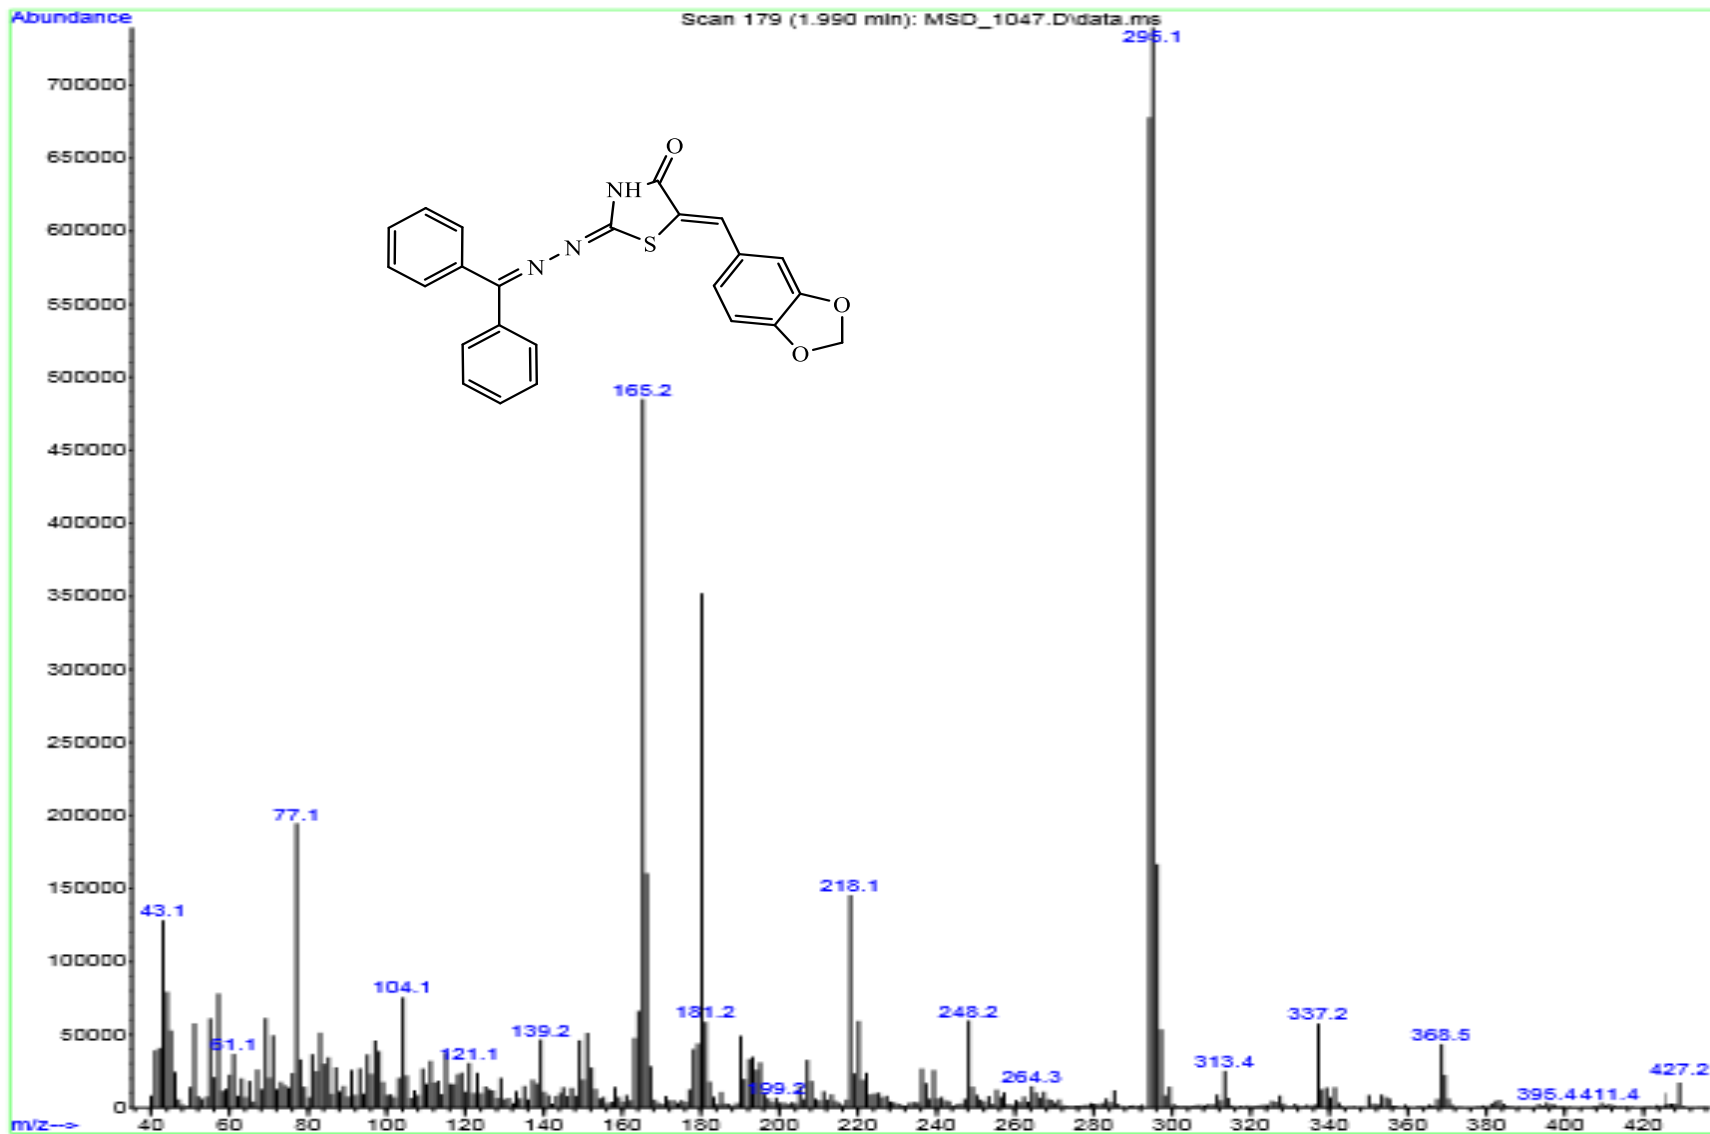

Mass spectrum of compound 3e

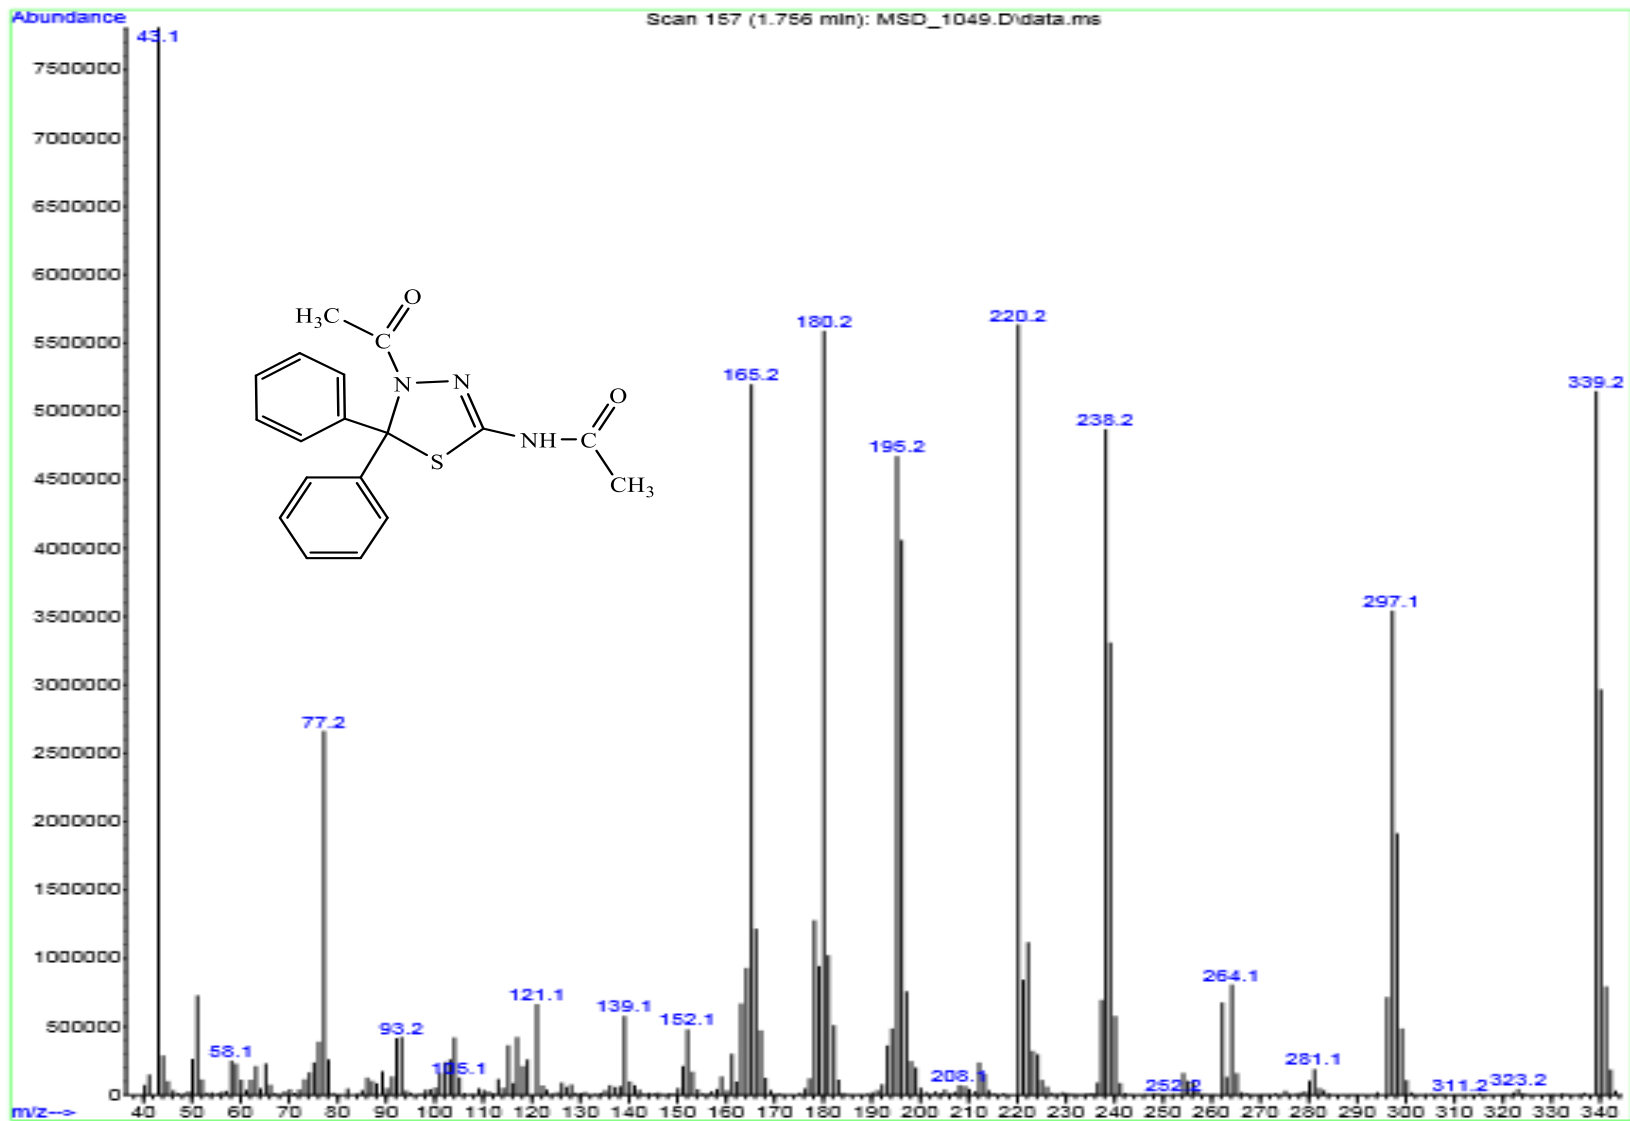

Mass spectrum of compound 4

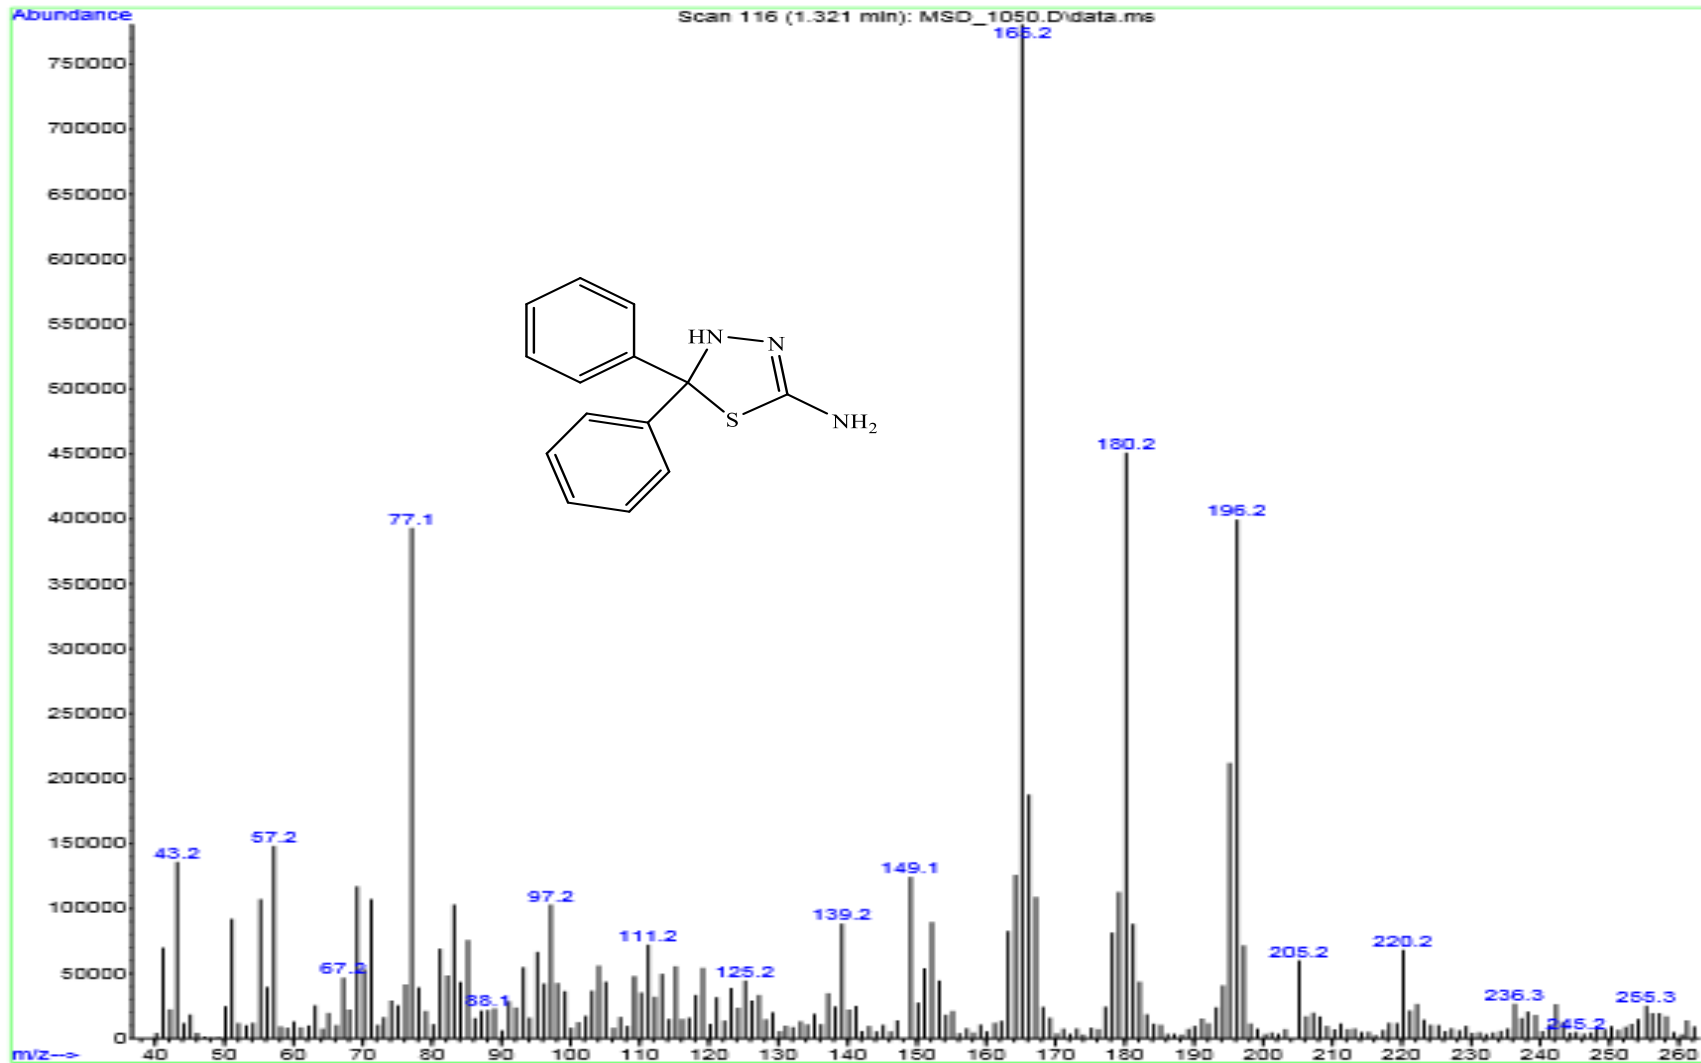

Mass spectrum of compound 5

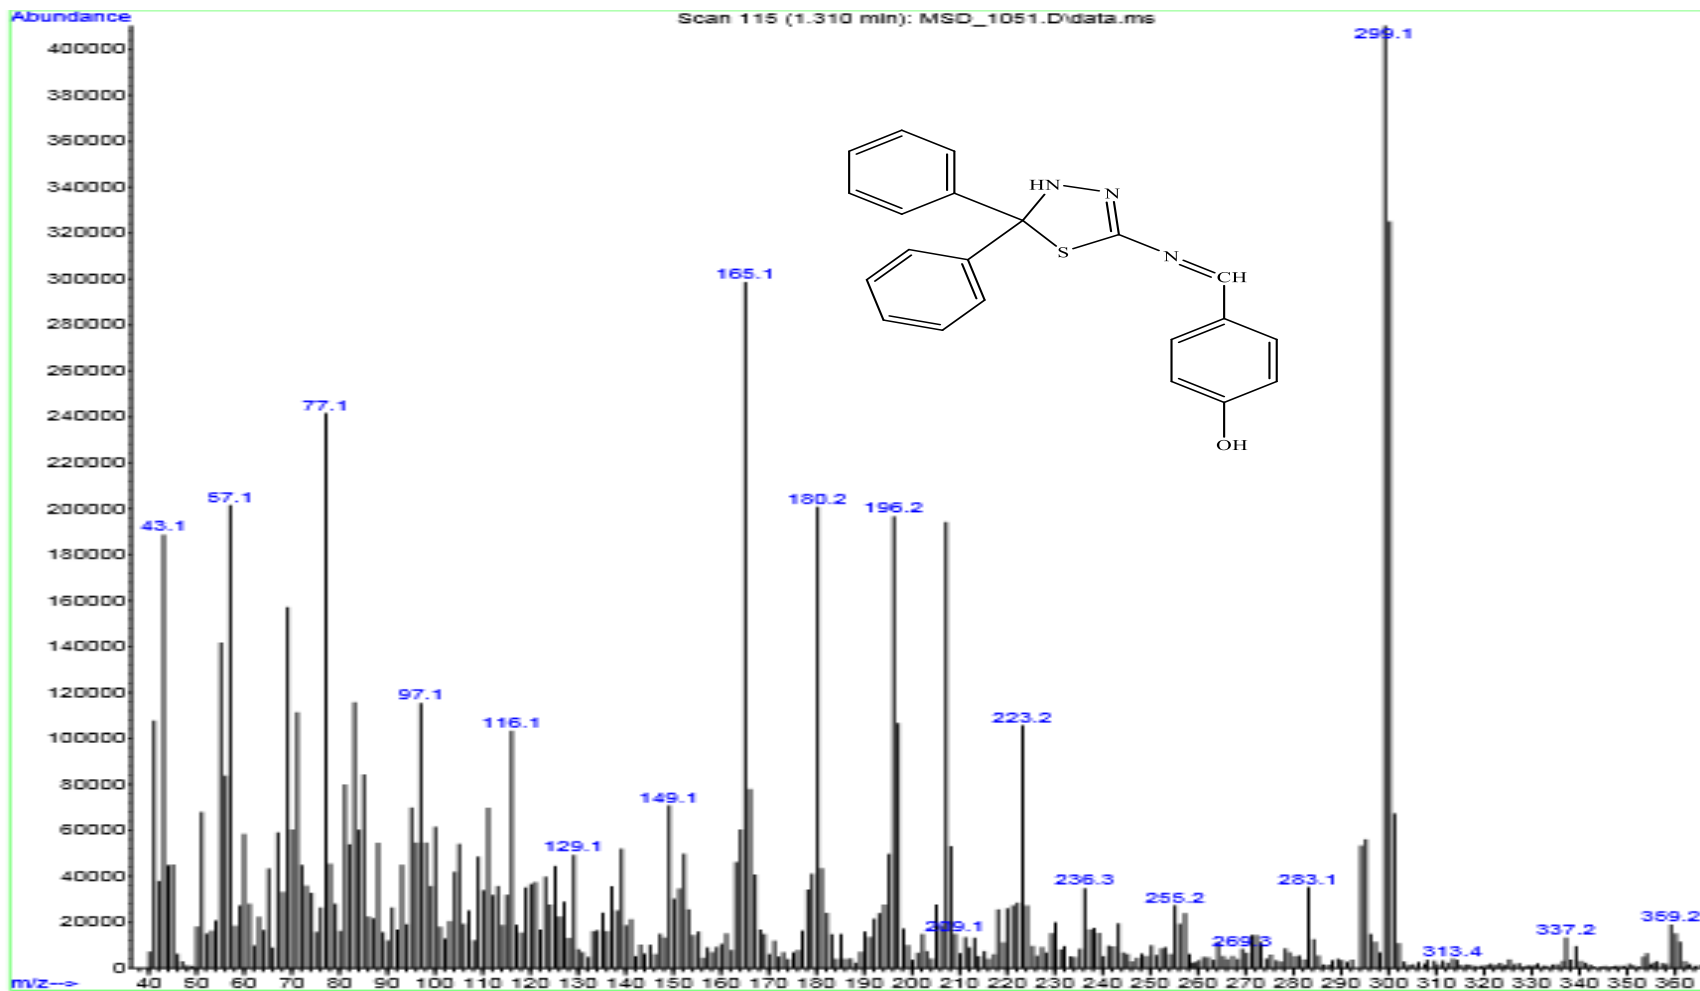

Mass spectrum of compound 6a

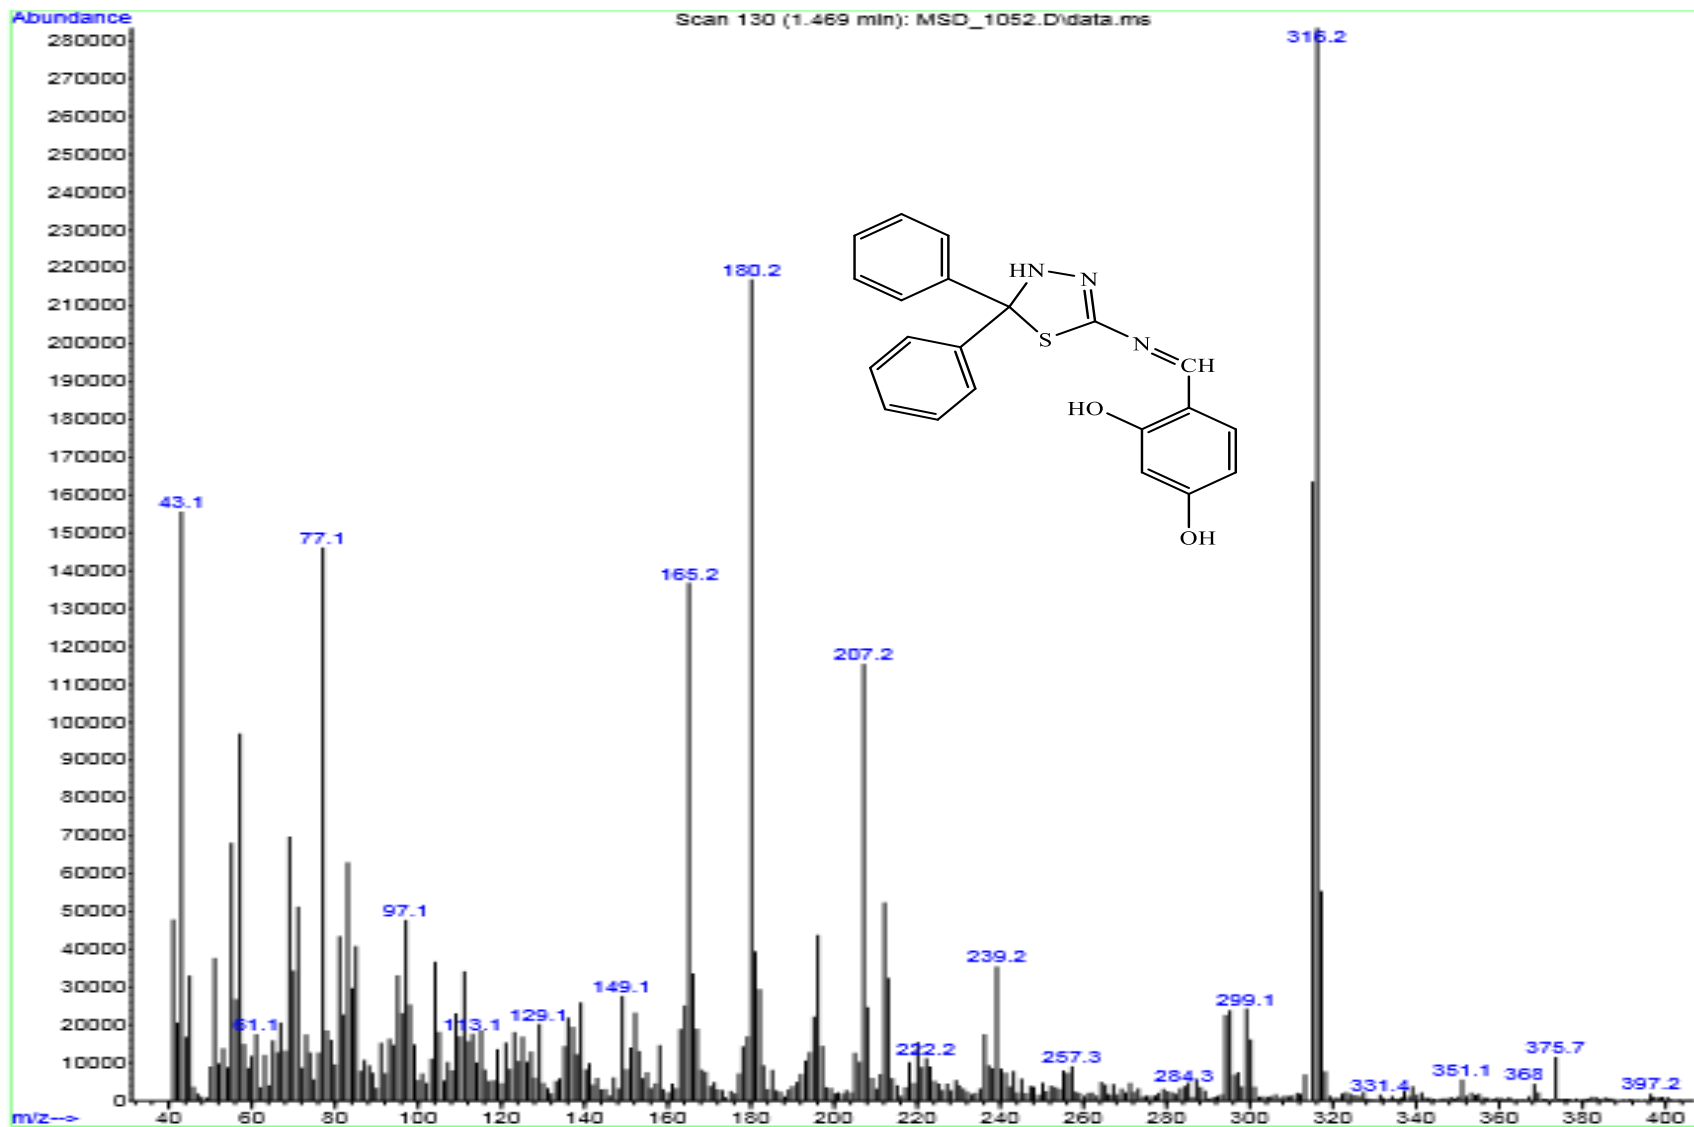

Mass spectrum of compound 6b
