# Supplementary material for: Anticancer, Antioxidant Activities and Molecular Docking Study of Thiazolidine -4-one and Thiadiazol Derivatives
Source: Research Square preprint supplement (doi:10.21203/rs.3.rs-1200559/v1), 2022-01-03
Supplement: Supplementary file 3 [file ae08ddfe8104890d8e6361dd.pdf]

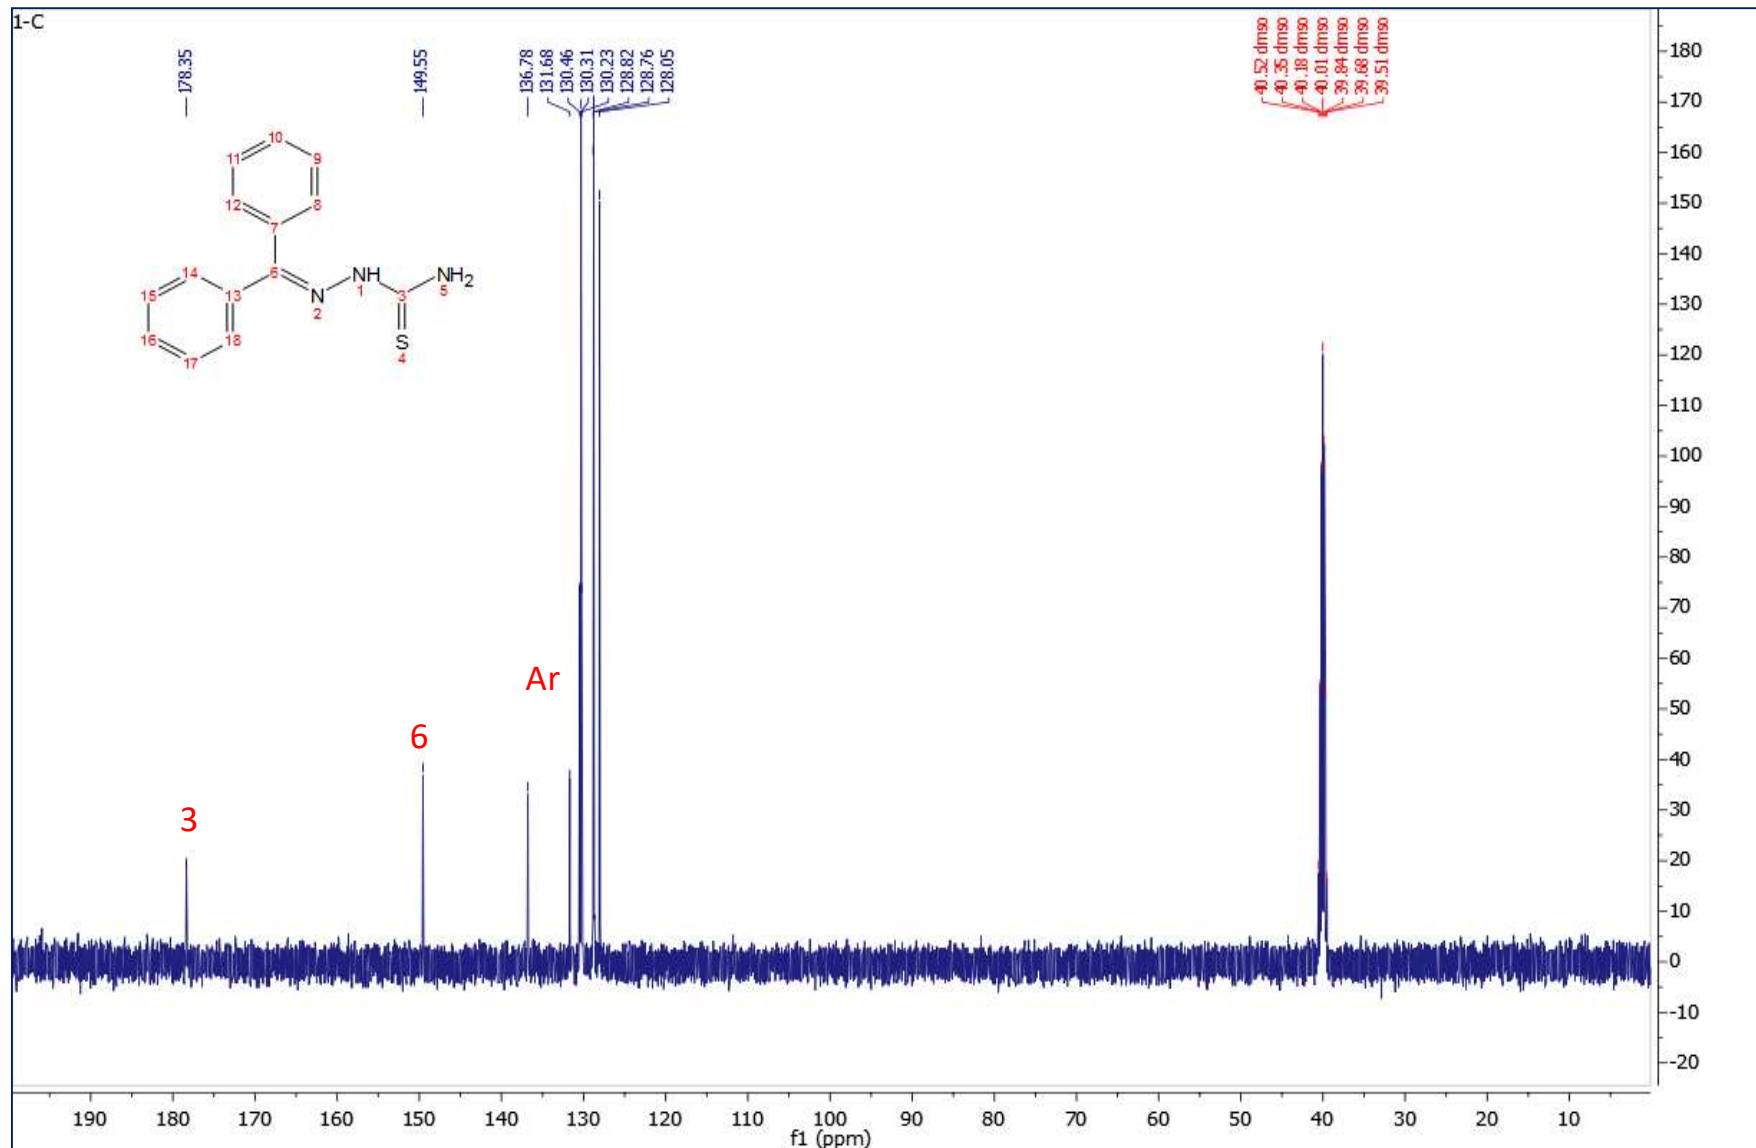

<sup>13</sup>CNMR spectrum of compound 1

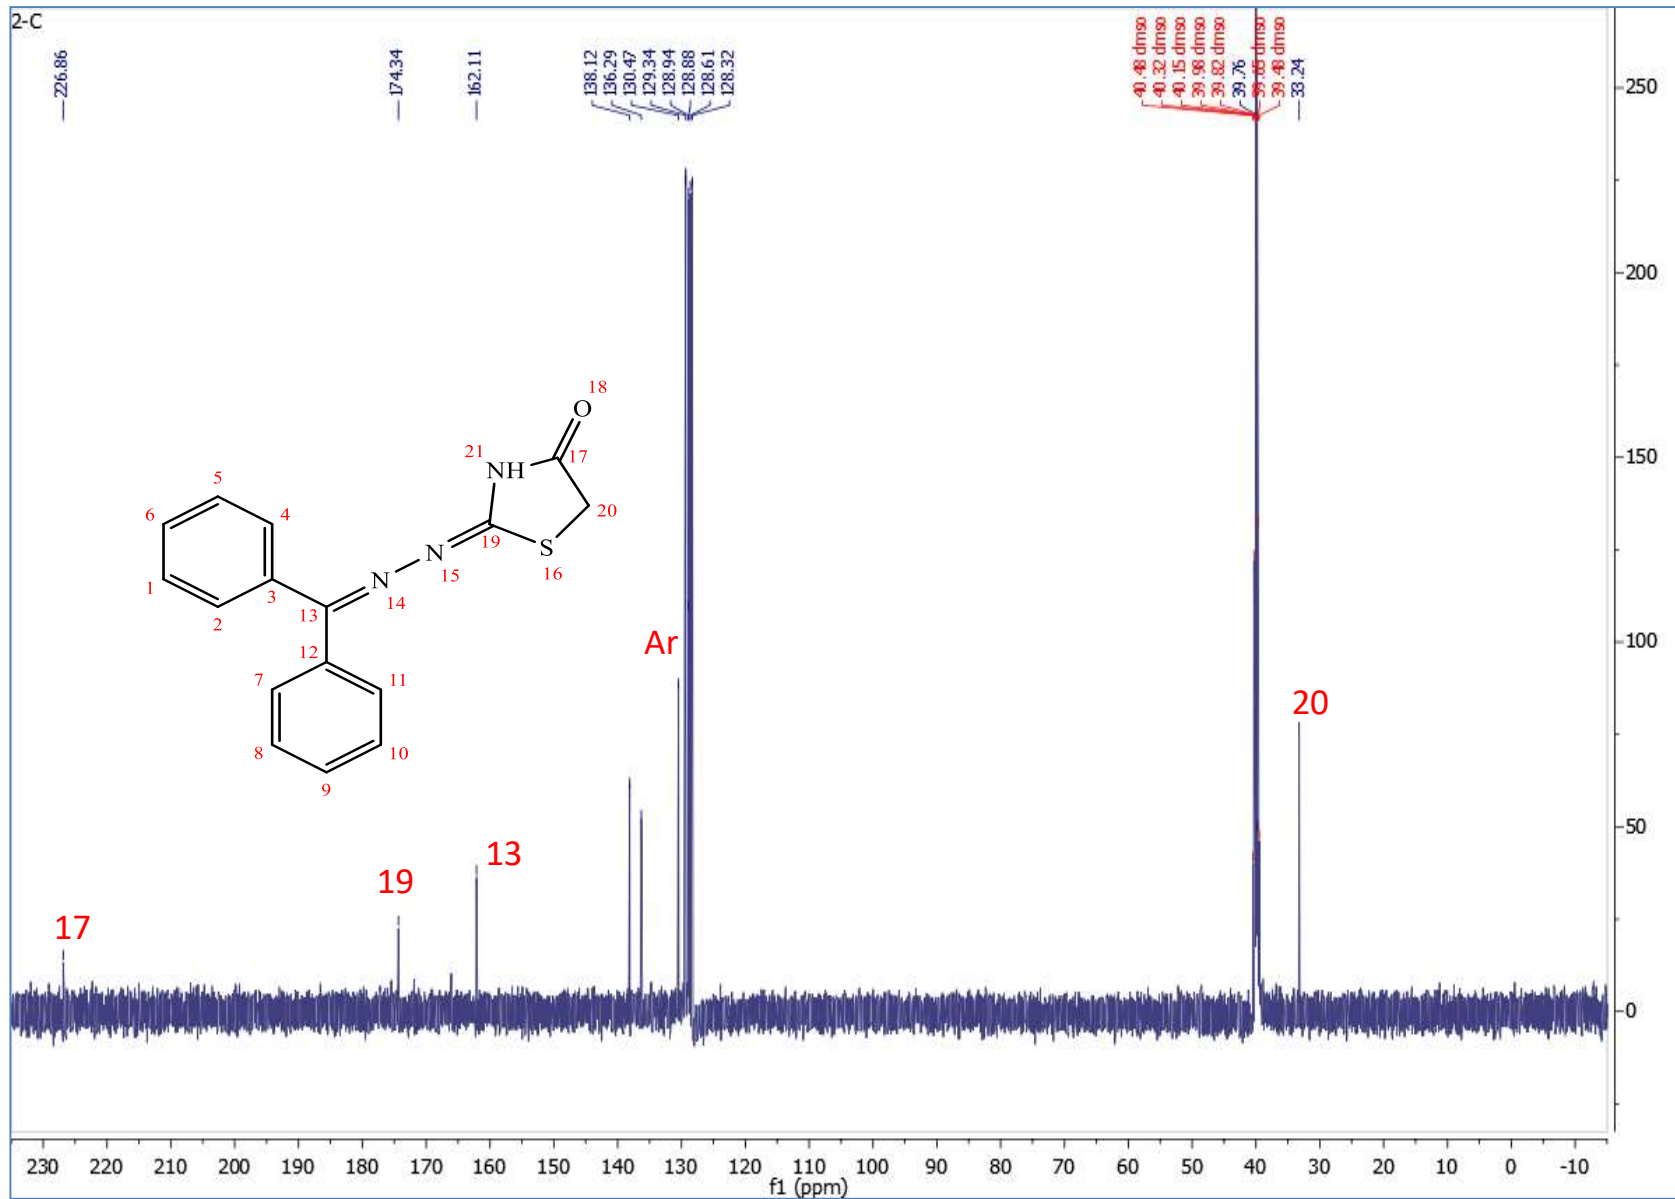

$^{13}\text{C}$ NMR spectrum of compound 2

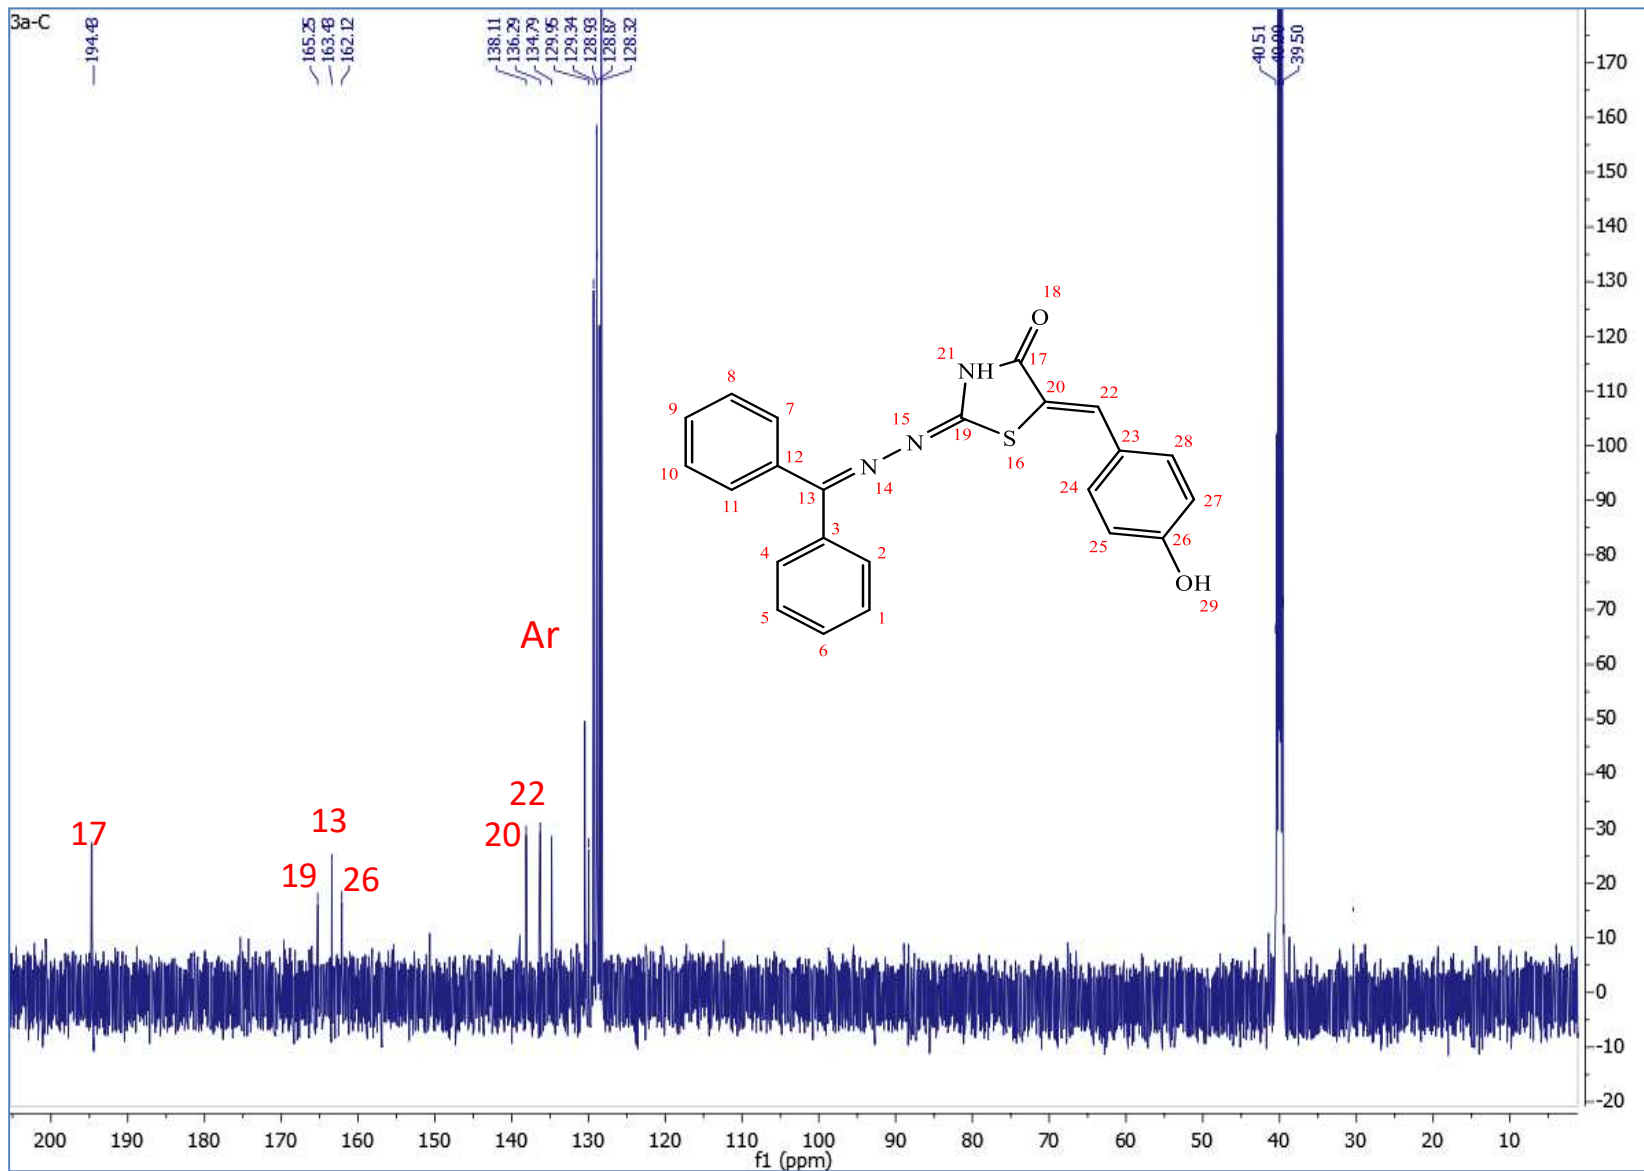

<sup>13</sup>CNMR spectrum of compound 3a

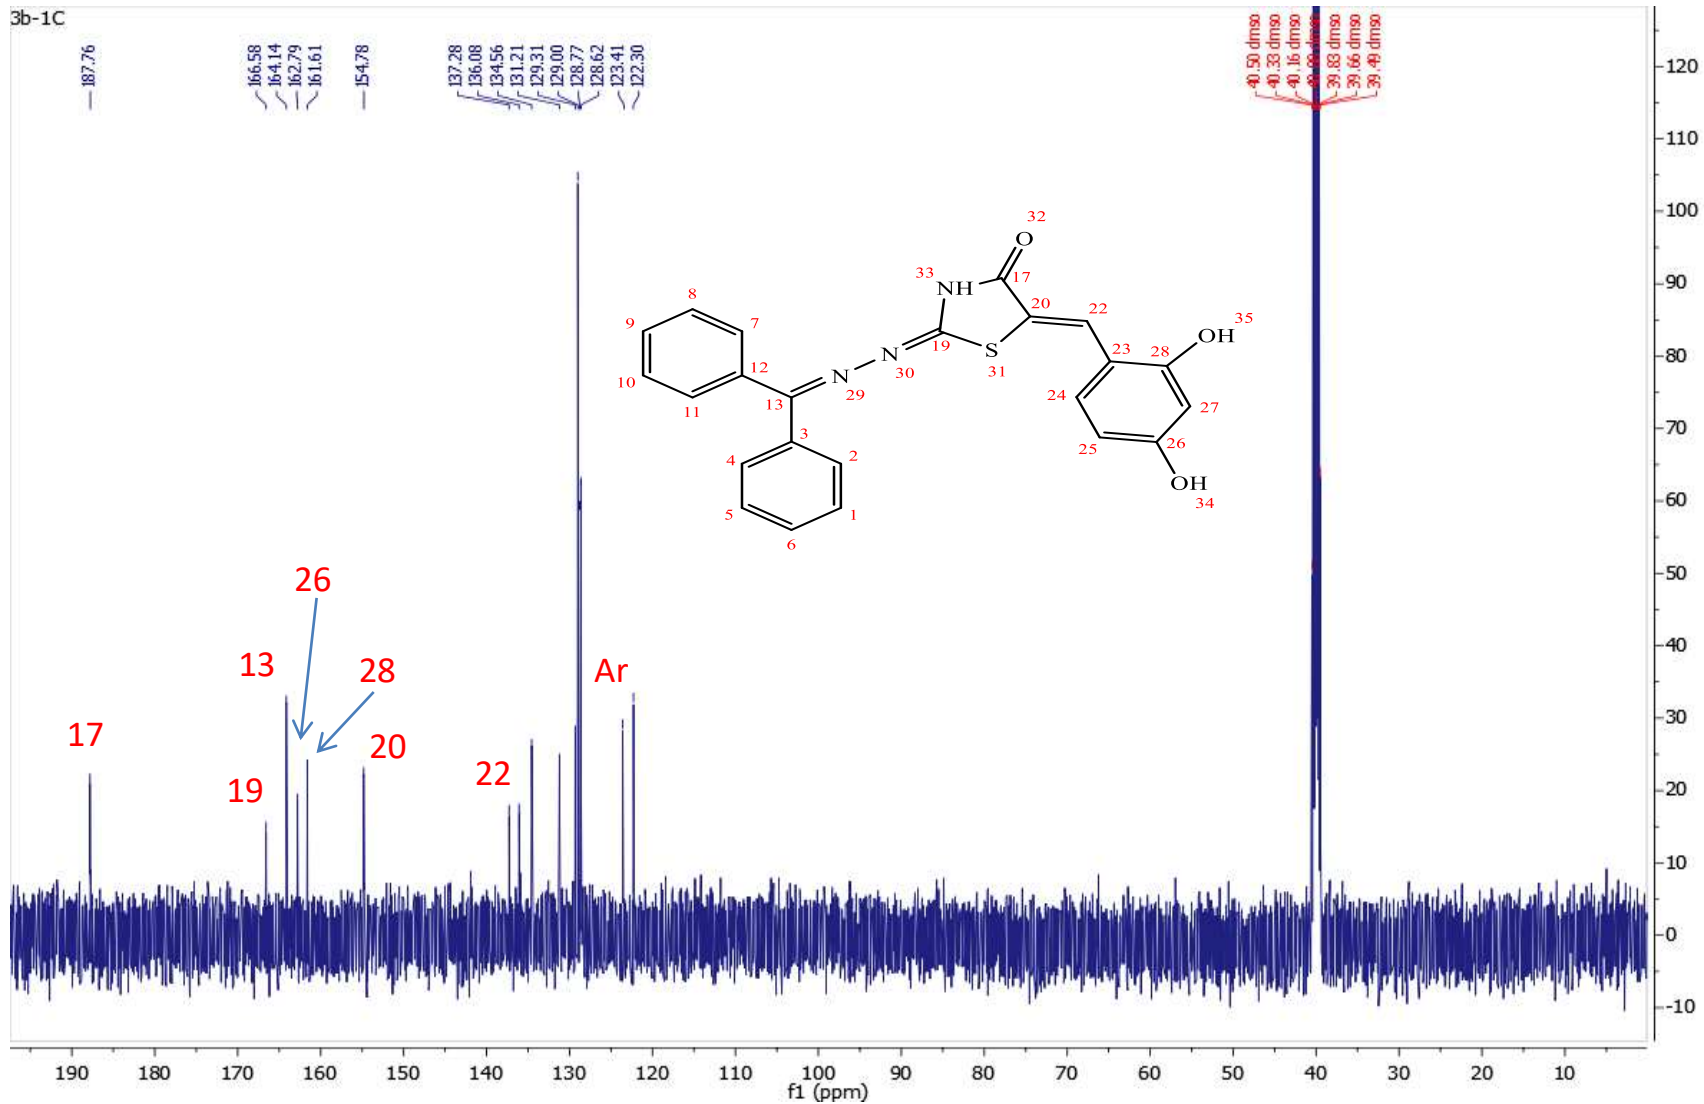

**<sup>13</sup>CNMR spectrum of compound 3b**

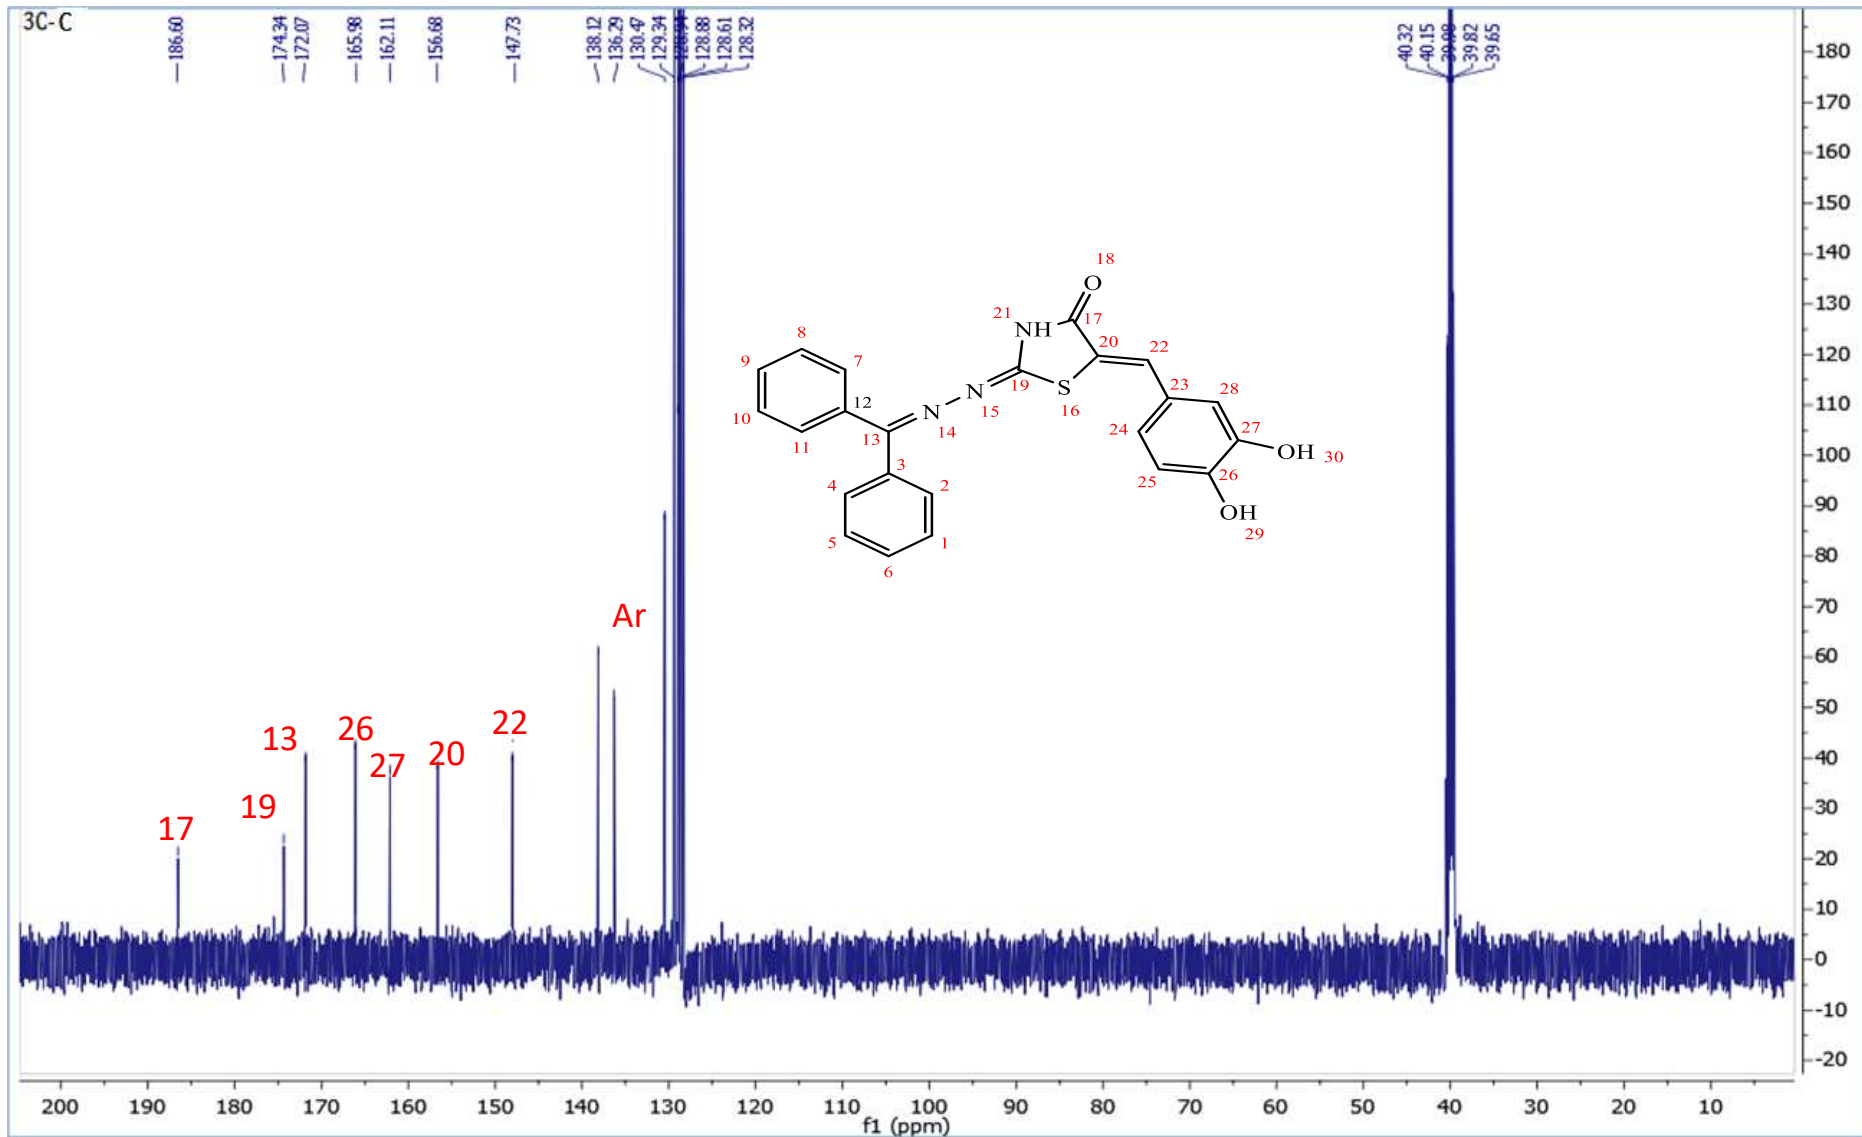

$^{13}\text{C}$ NMR spectrum of compound 3c

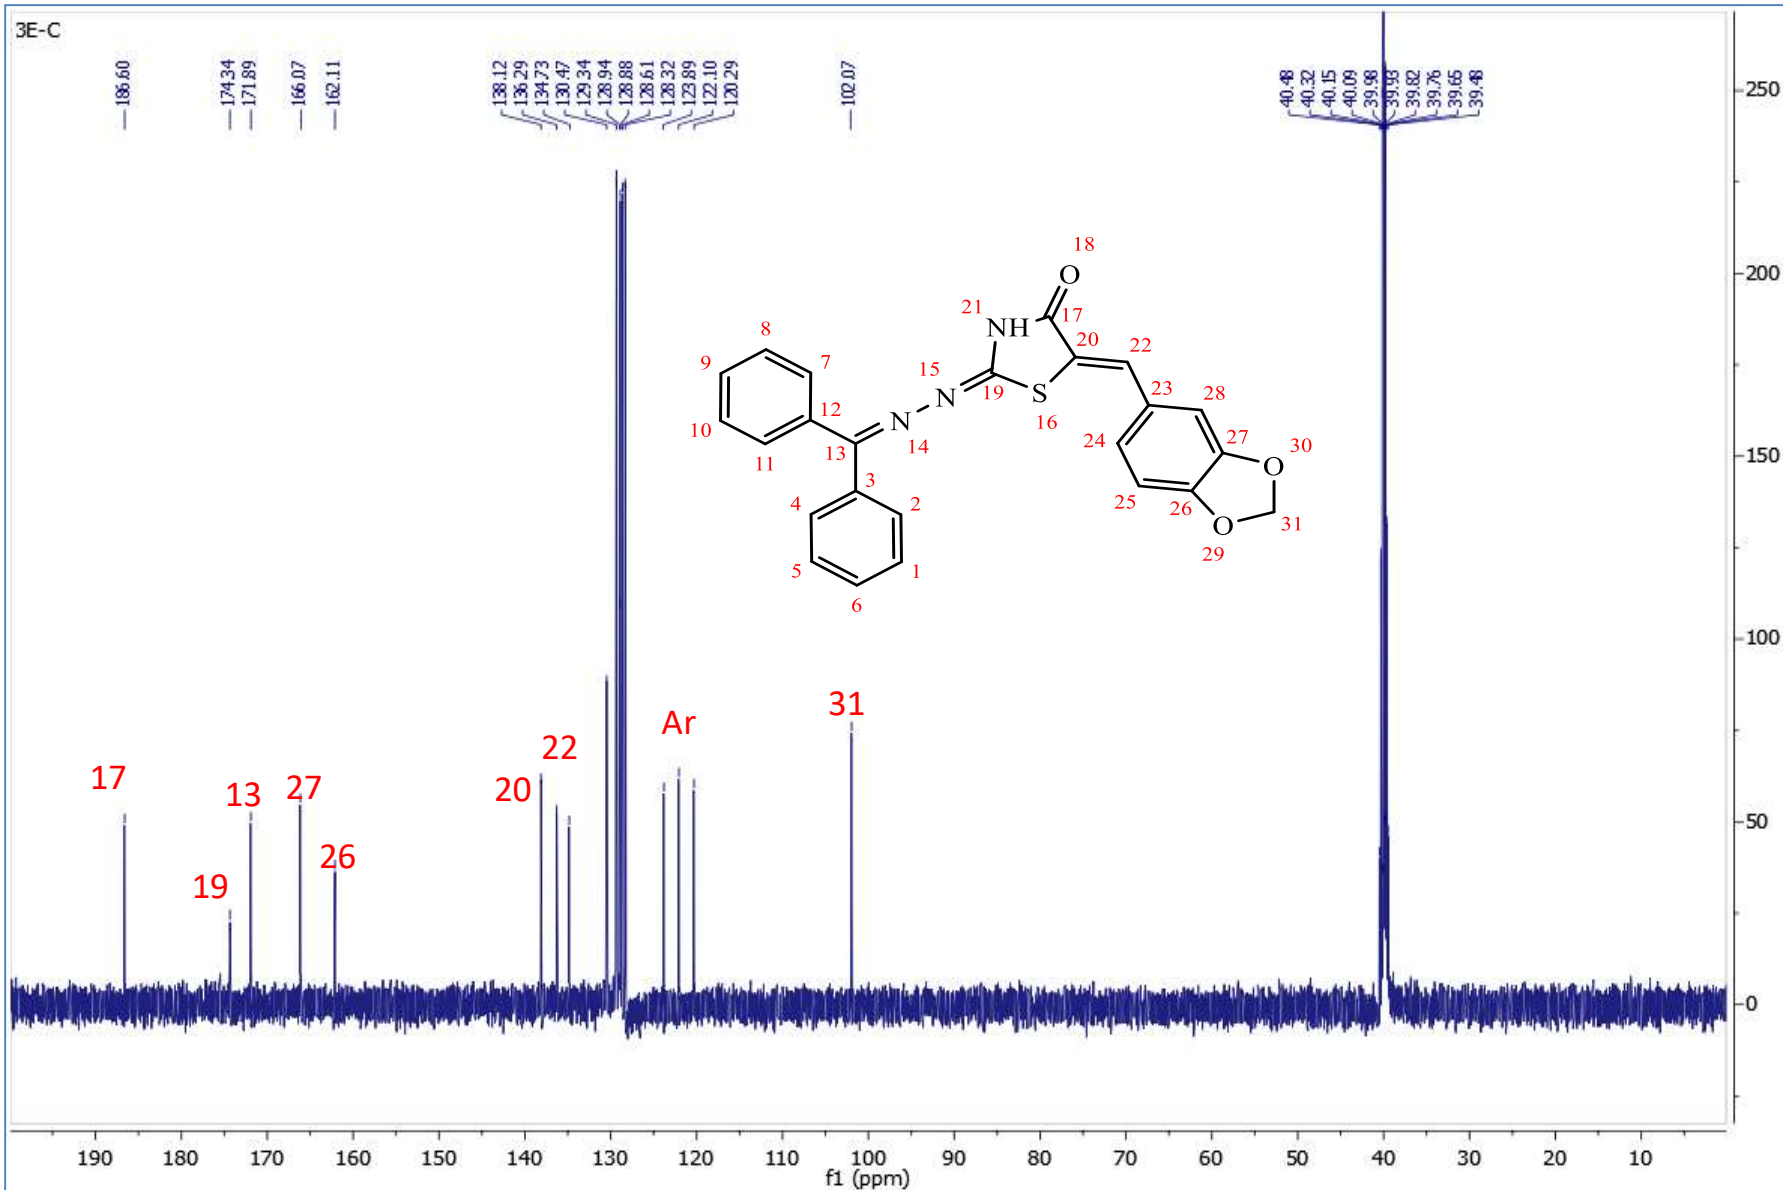

<sup>13</sup>CNMR spectrum of compound 3d

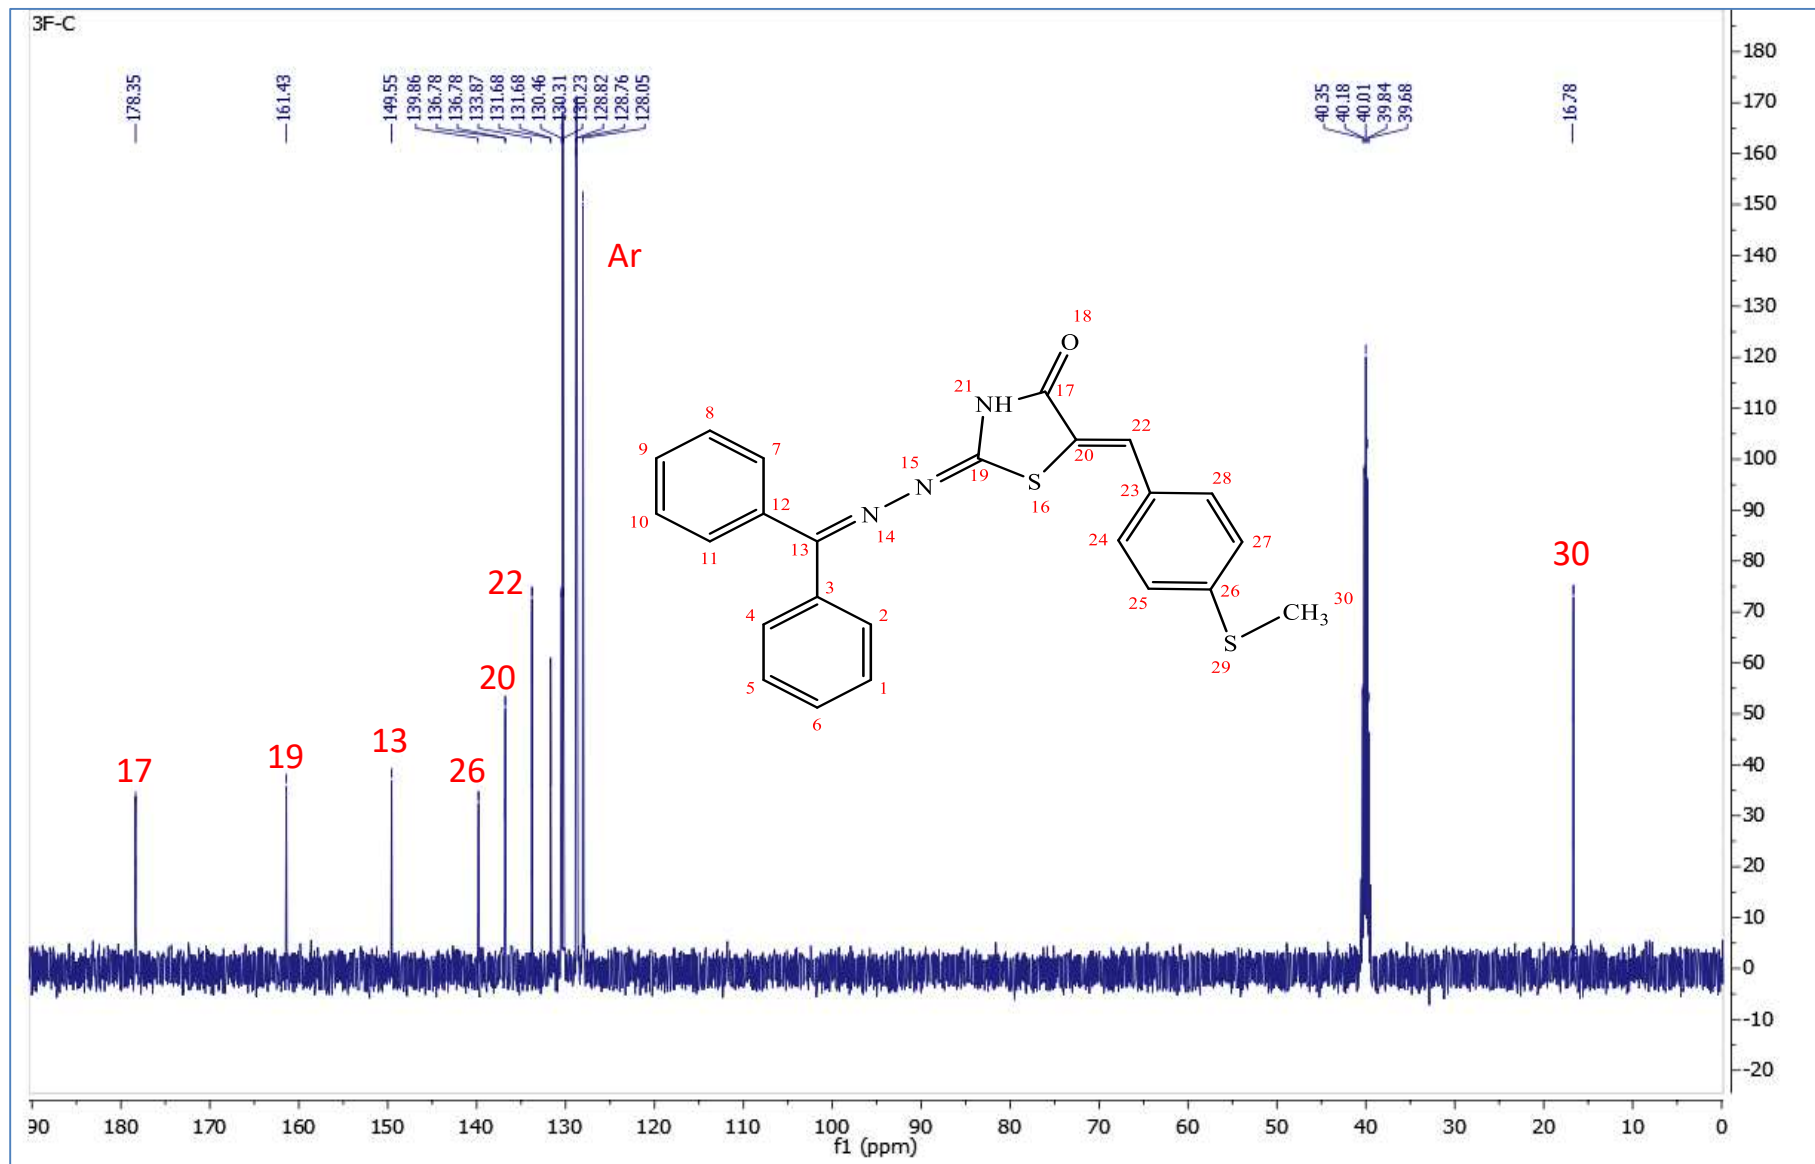

<sup>13</sup>CNMR spectrum of compound 3e

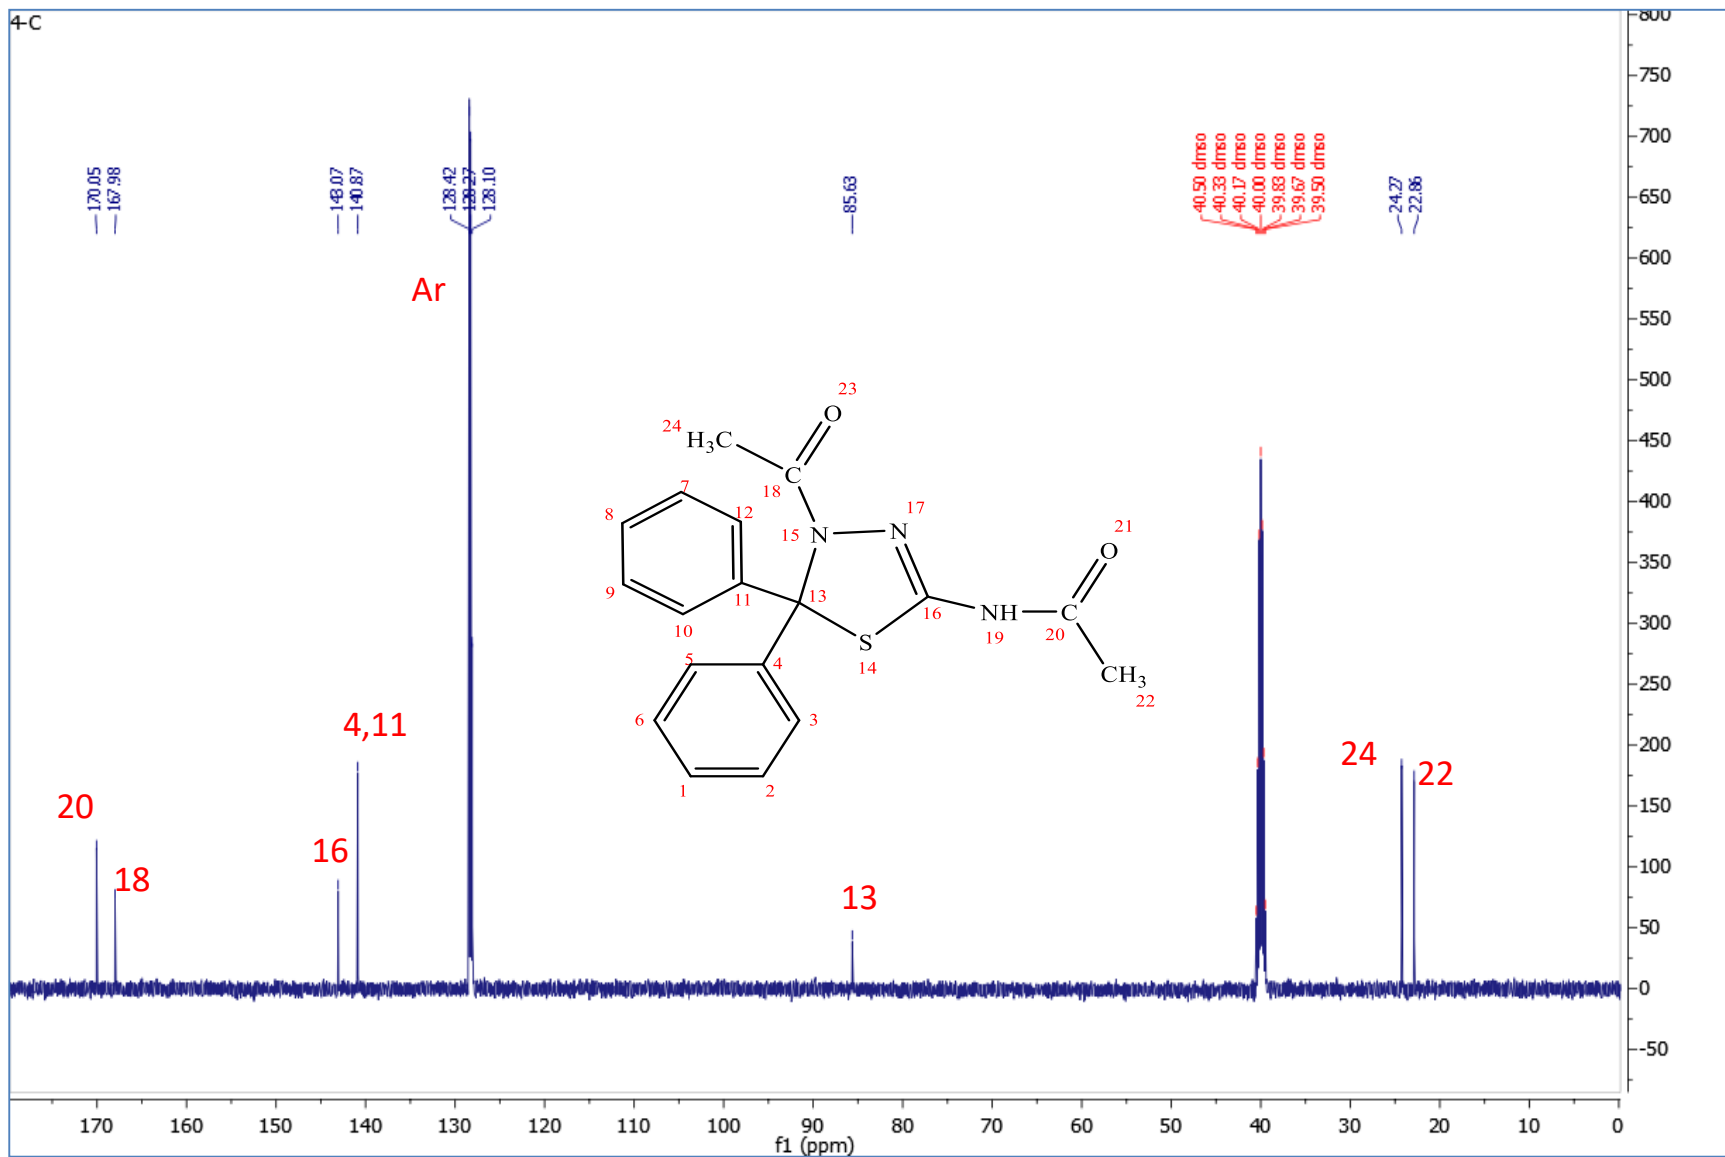

$^{13}\text{C}$ NMR spectrum of compound 4

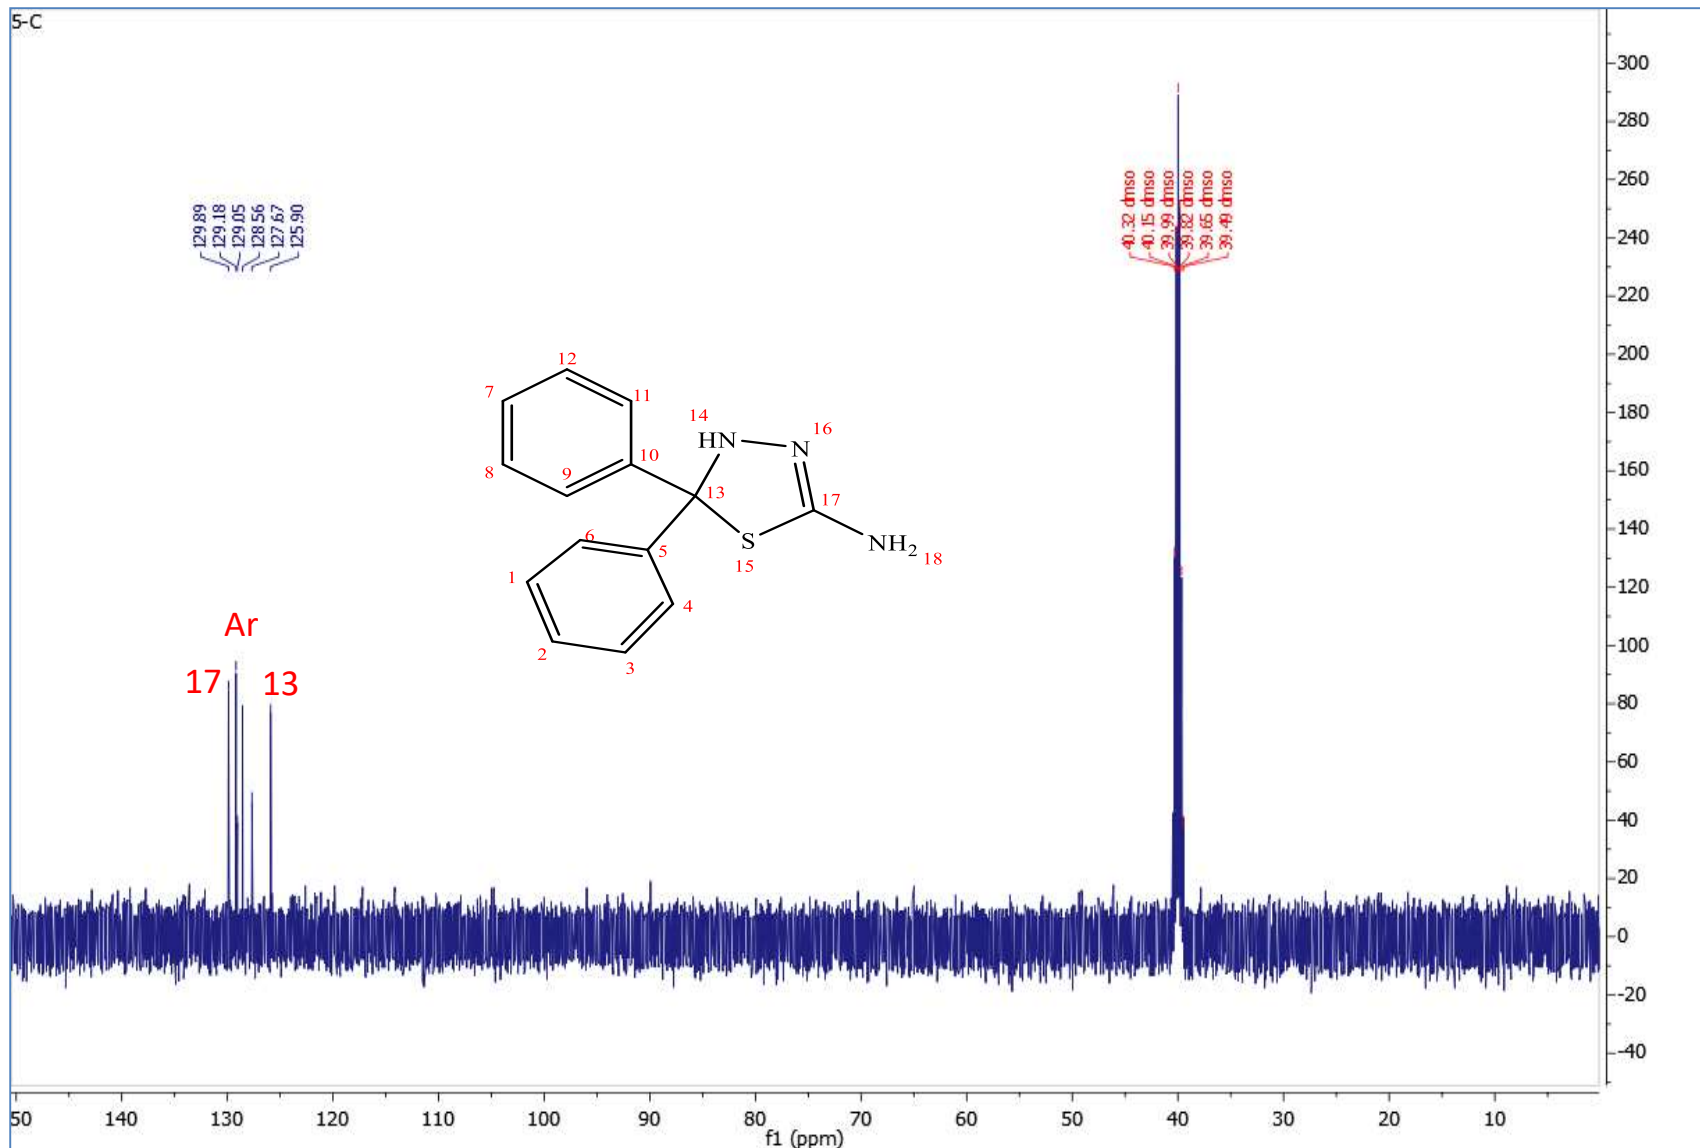

$^{13}\text{C}$ NMR spectrum of compound 5

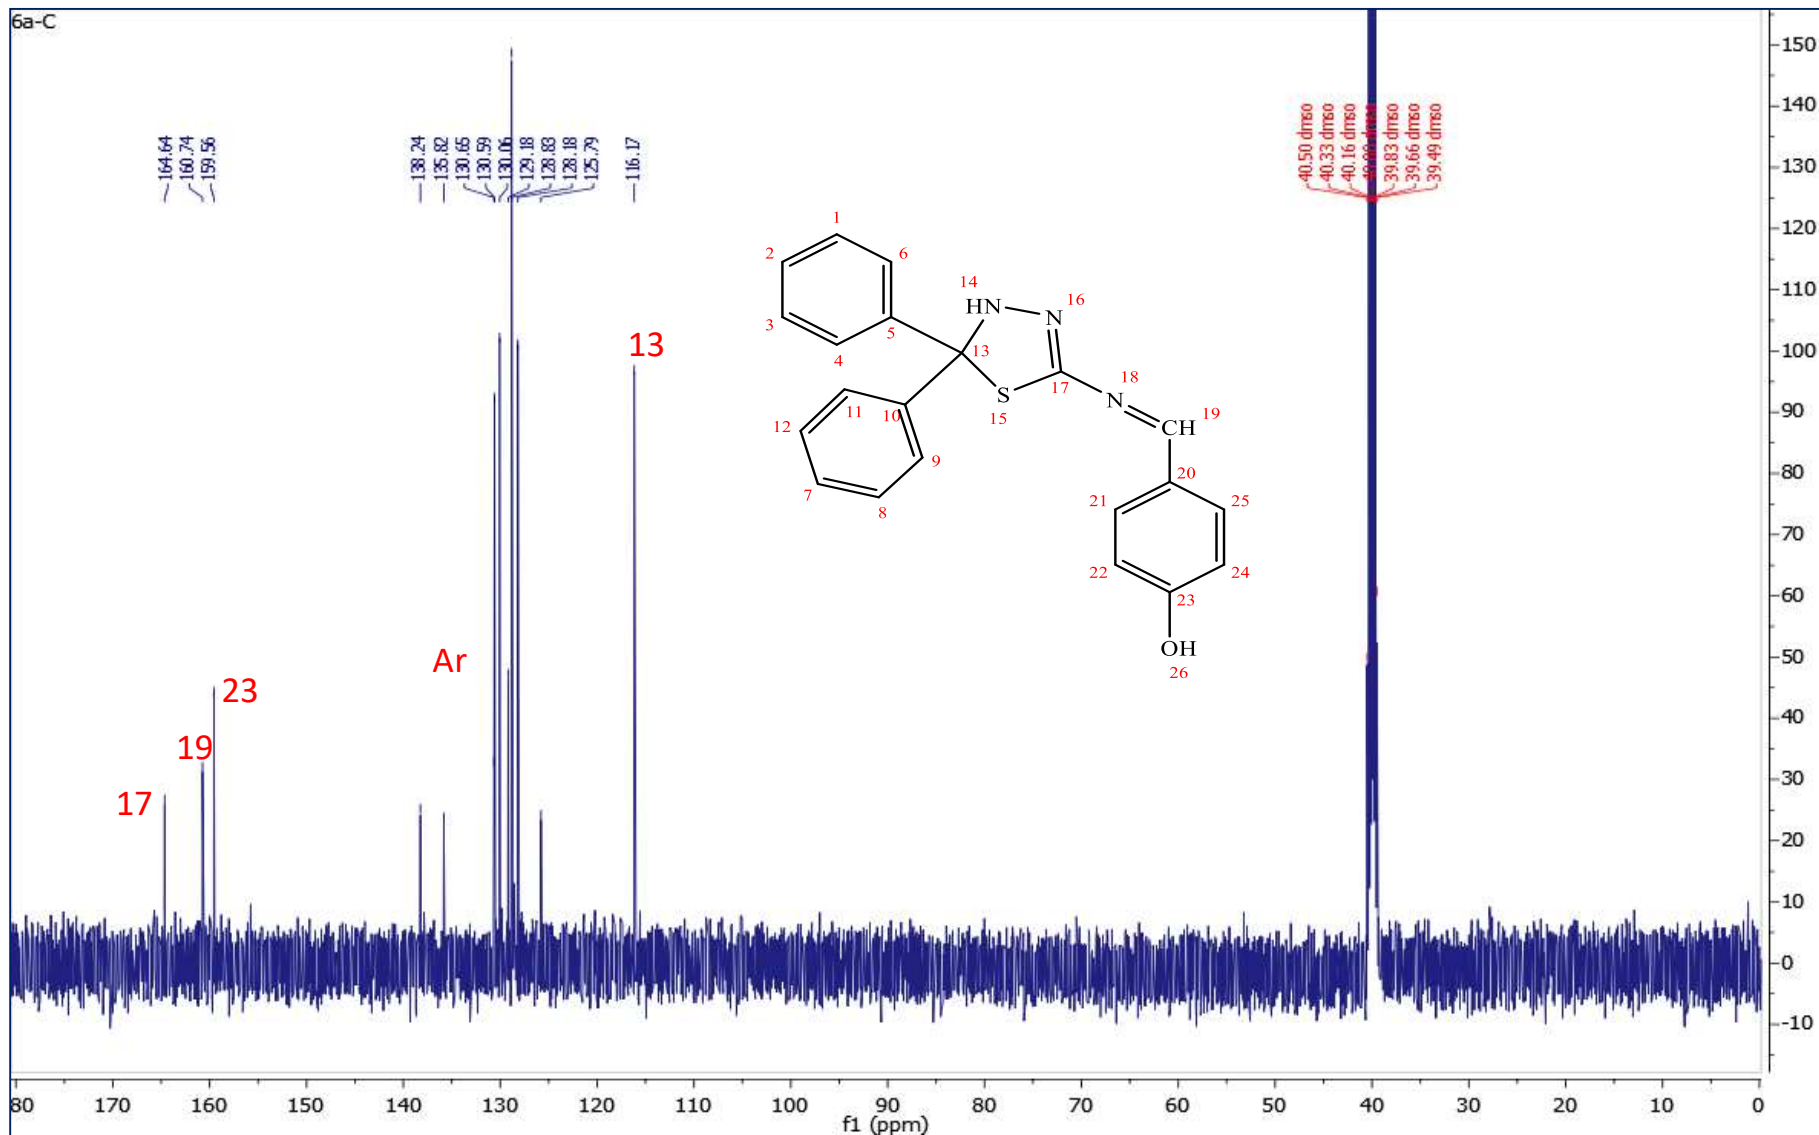

<sup>13</sup>CNMR spectrum of compound 6a

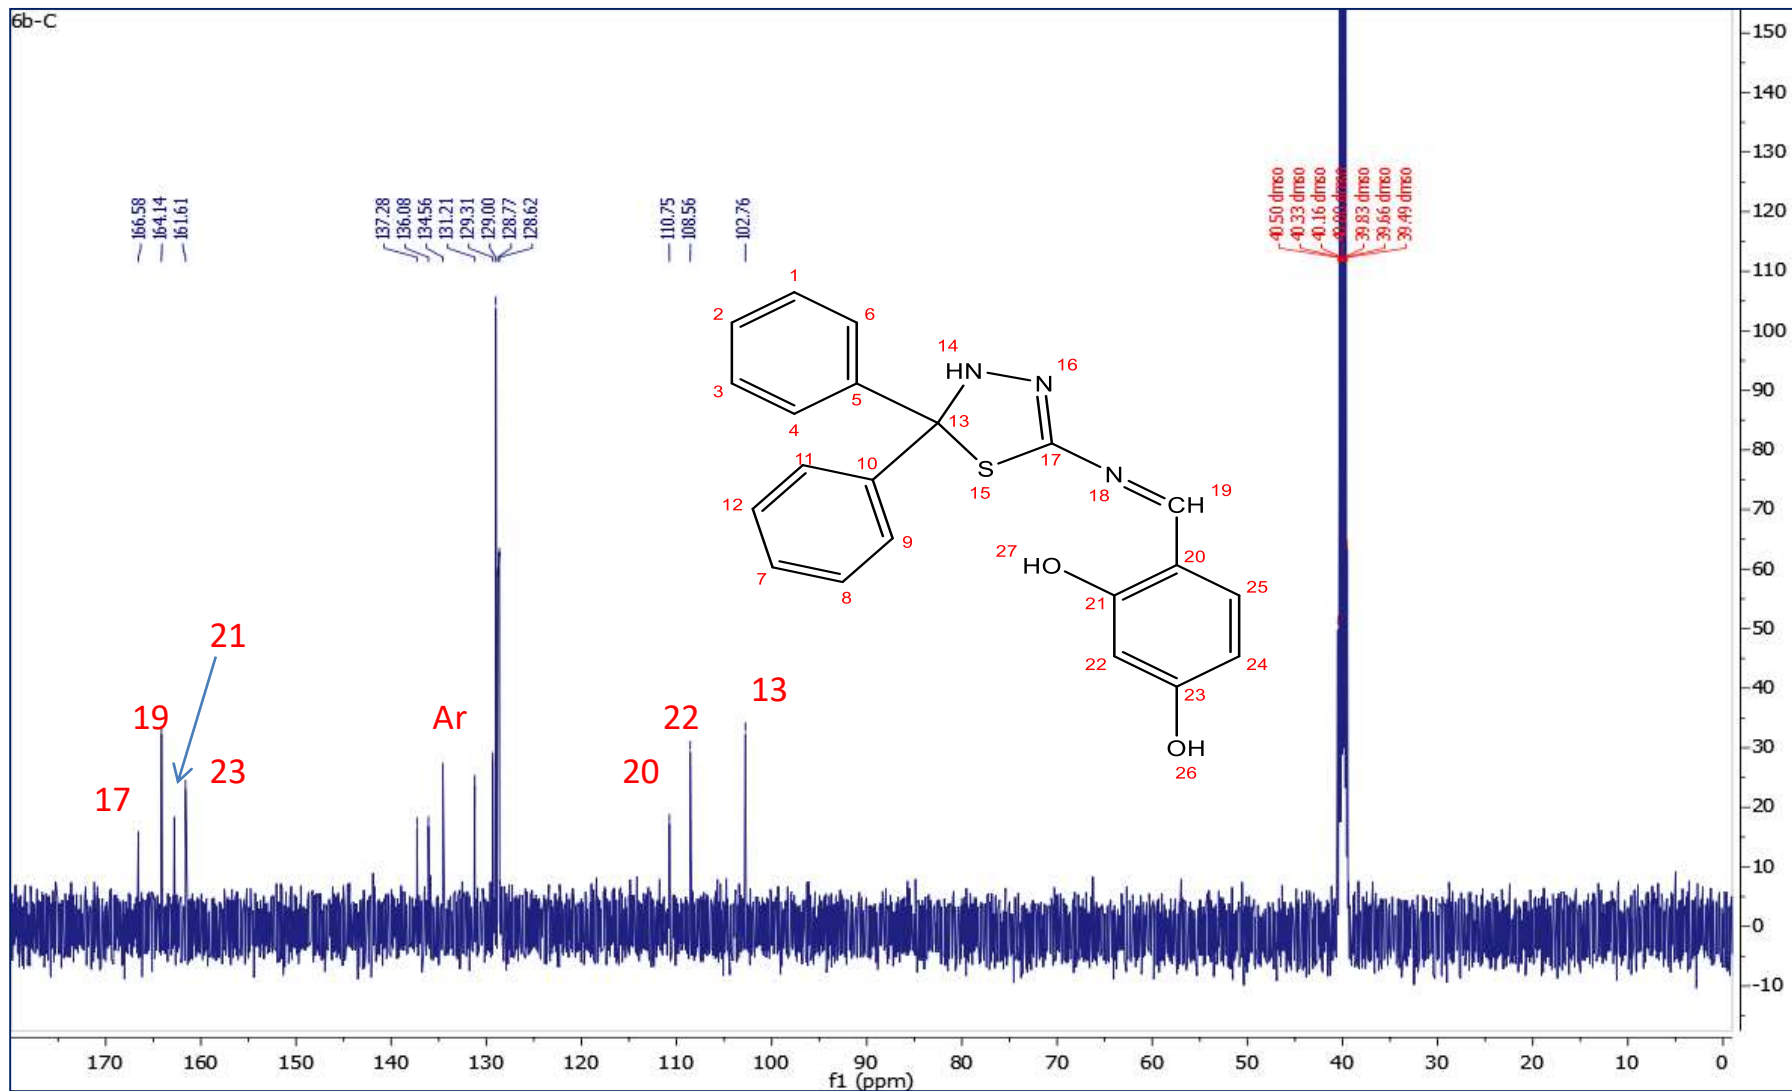

<sup>13</sup>CNMR spectrum of compound 6b
