# Supplementary material for: Anticancer, Antioxidant Activities and Molecular Docking Study of Thiazolidine -4-one and Thiadiazol Derivatives
Source: Research Square preprint supplement (doi:10.21203/rs.3.rs-1200559/v1), 2022-01-03
Supplement: Supplementary file 4 [file ebed989aa9be4557351b4f49.pdf]

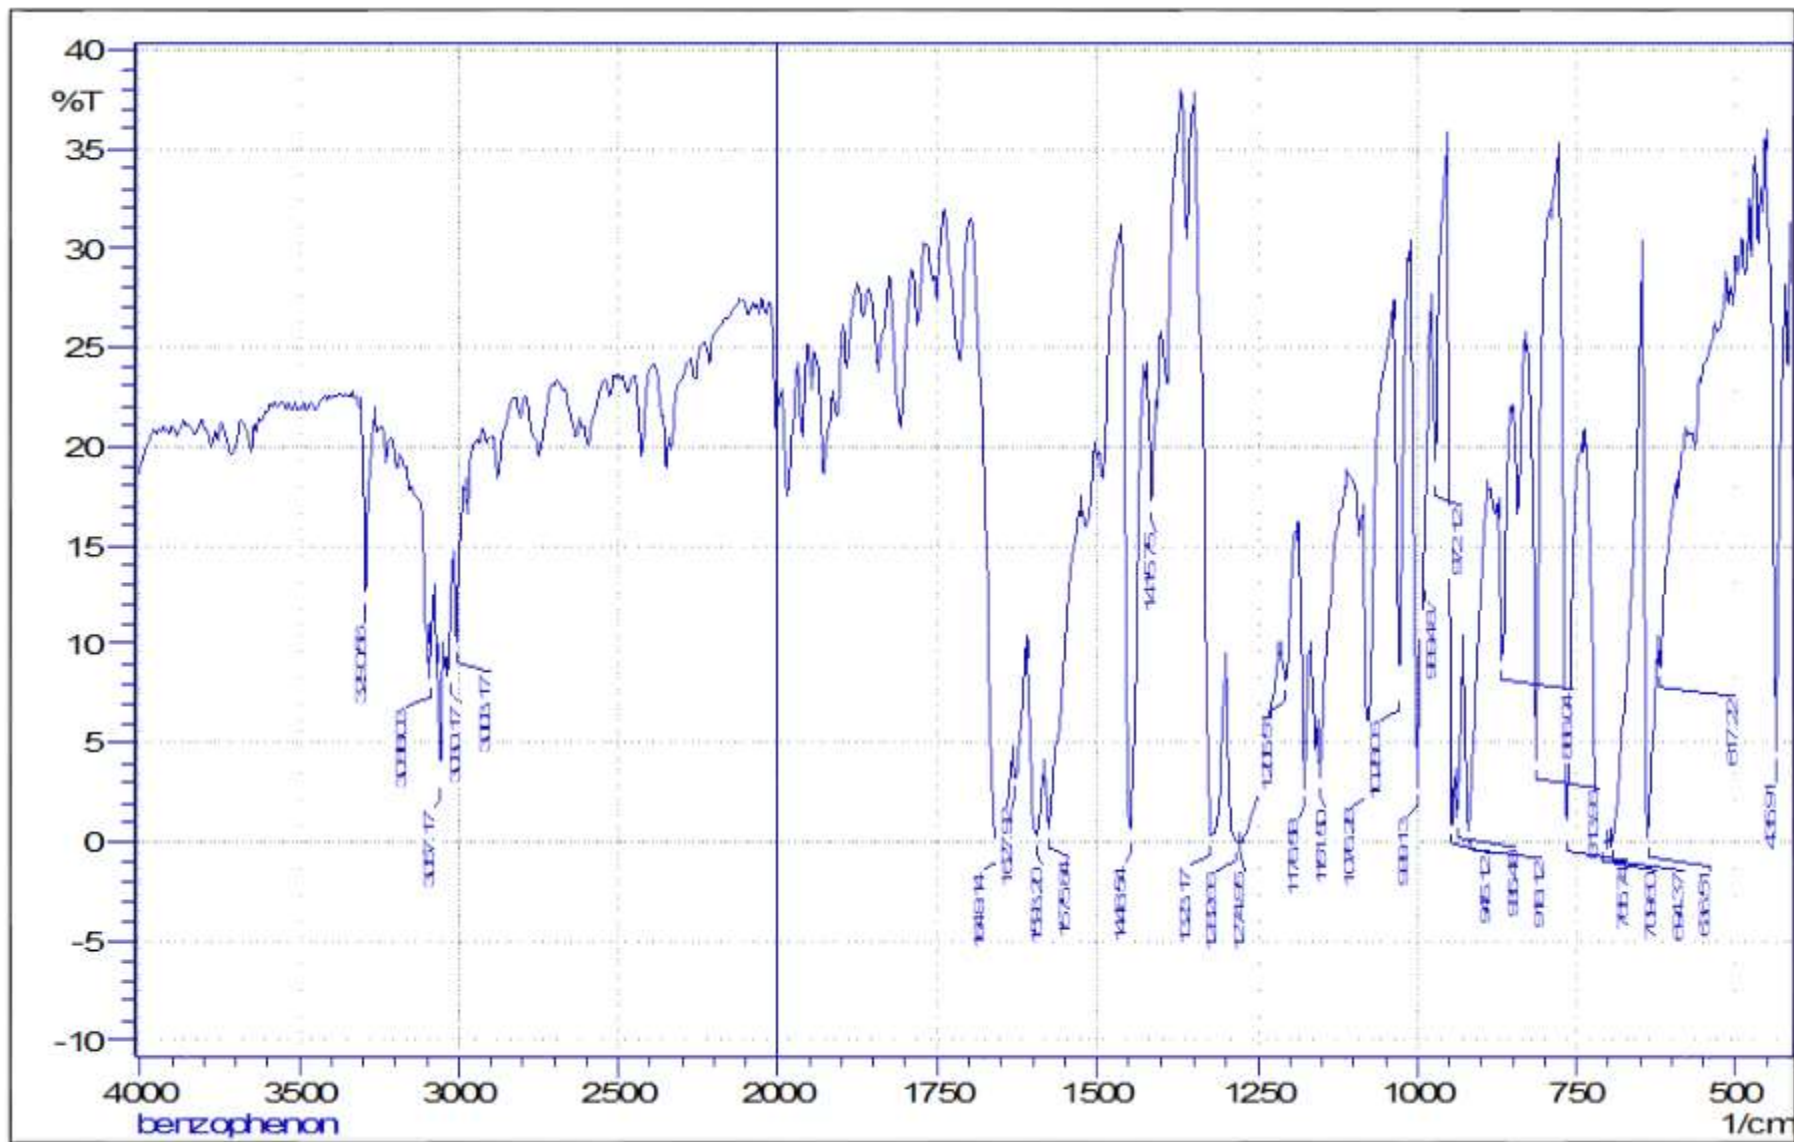

FTIR spectrum of benzophenone

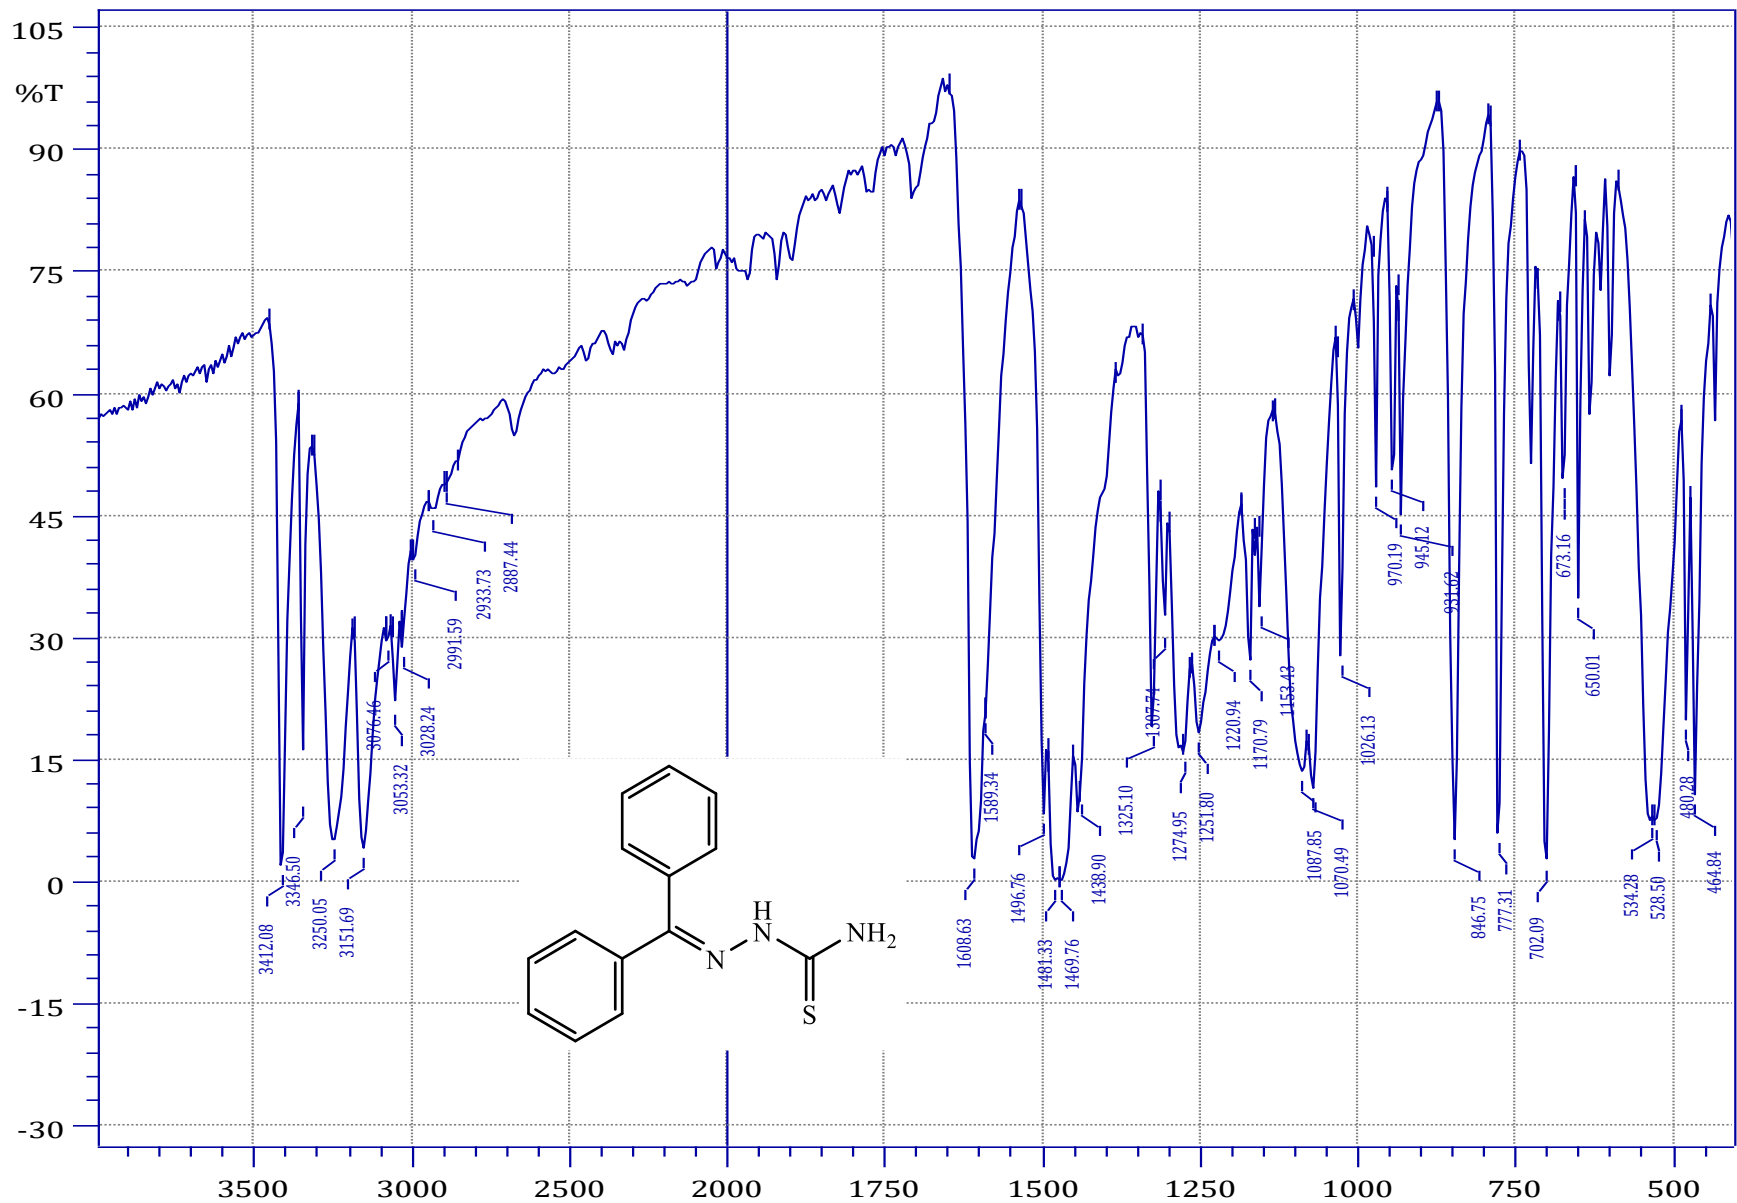

noor- 1

FTIR spectrum of compound ( 1 )

1/cm

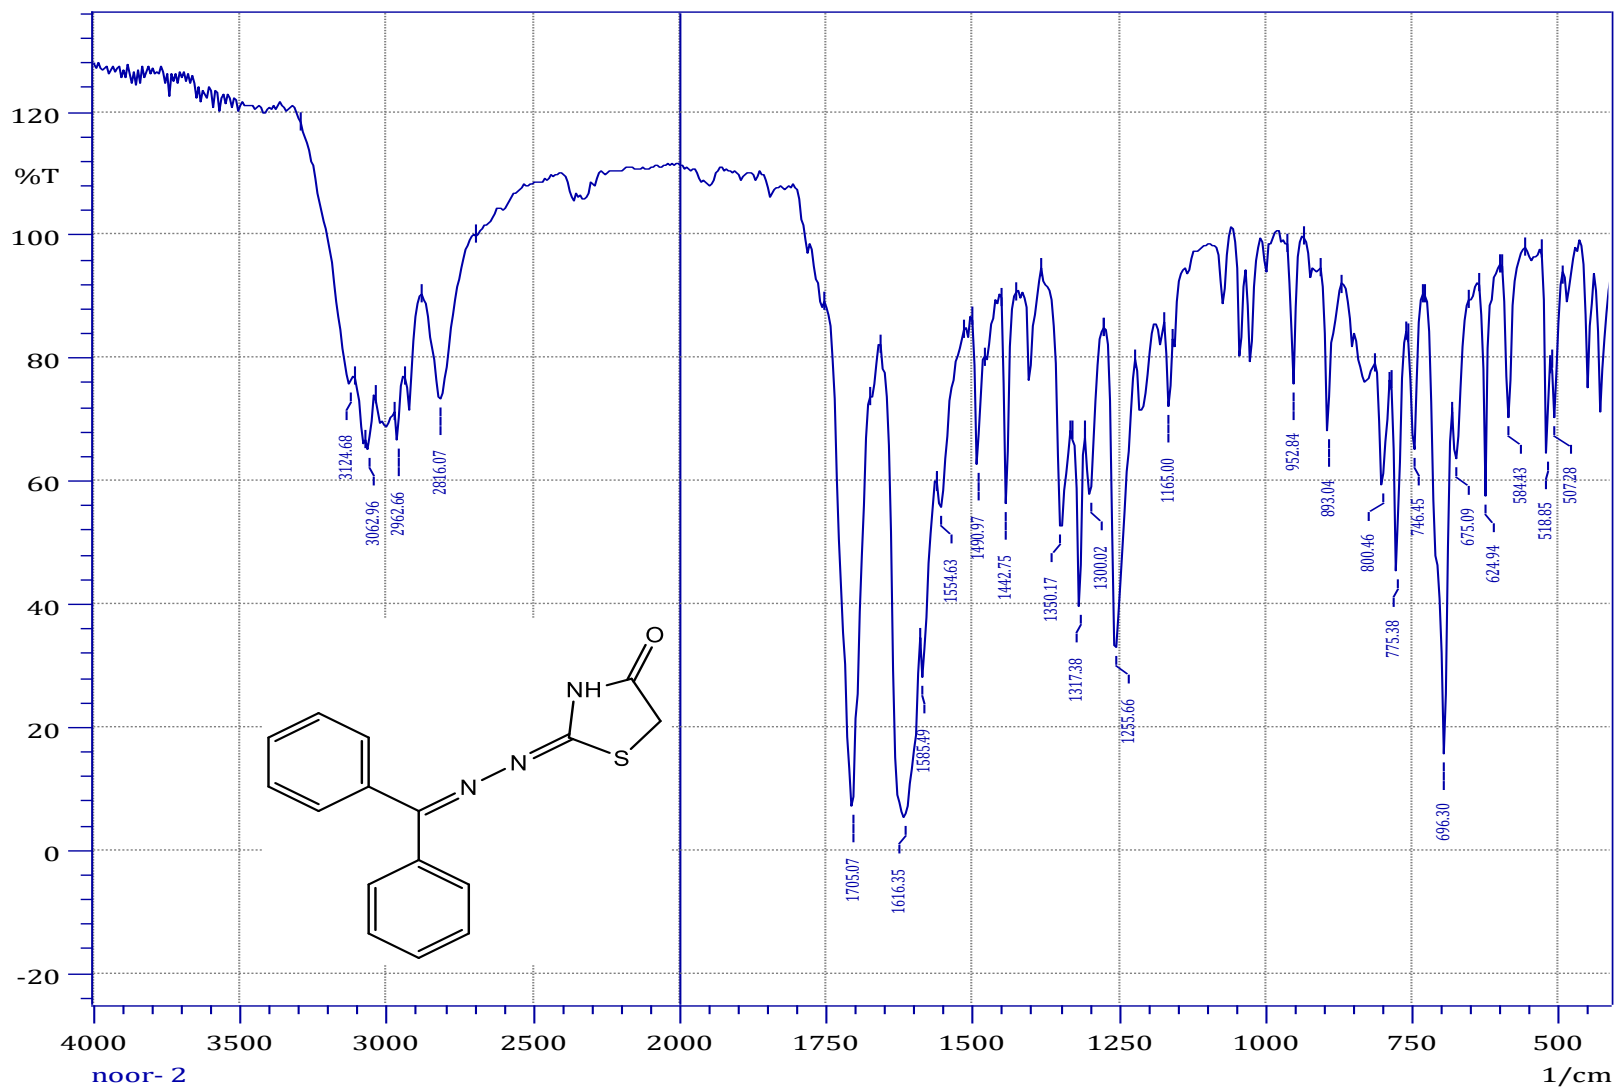

FTIR spectrum of compound ( 2 )

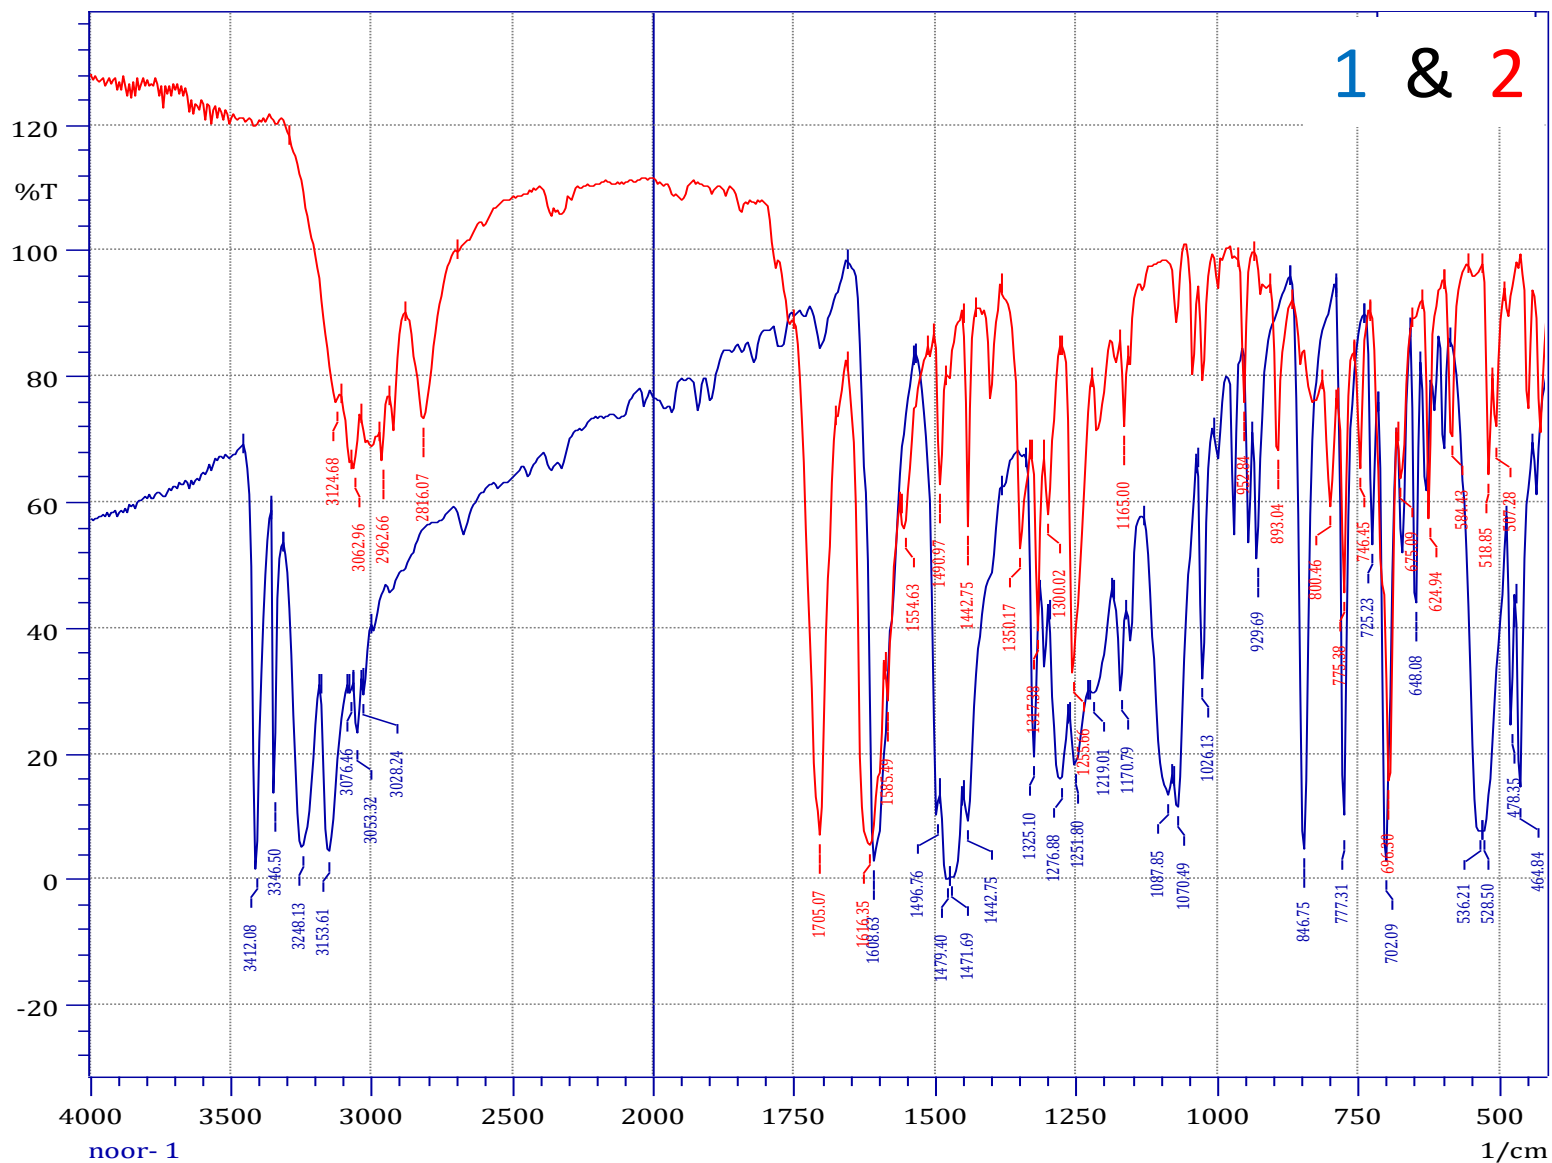

FTIR spectrum of compound ( 1 and 2 )

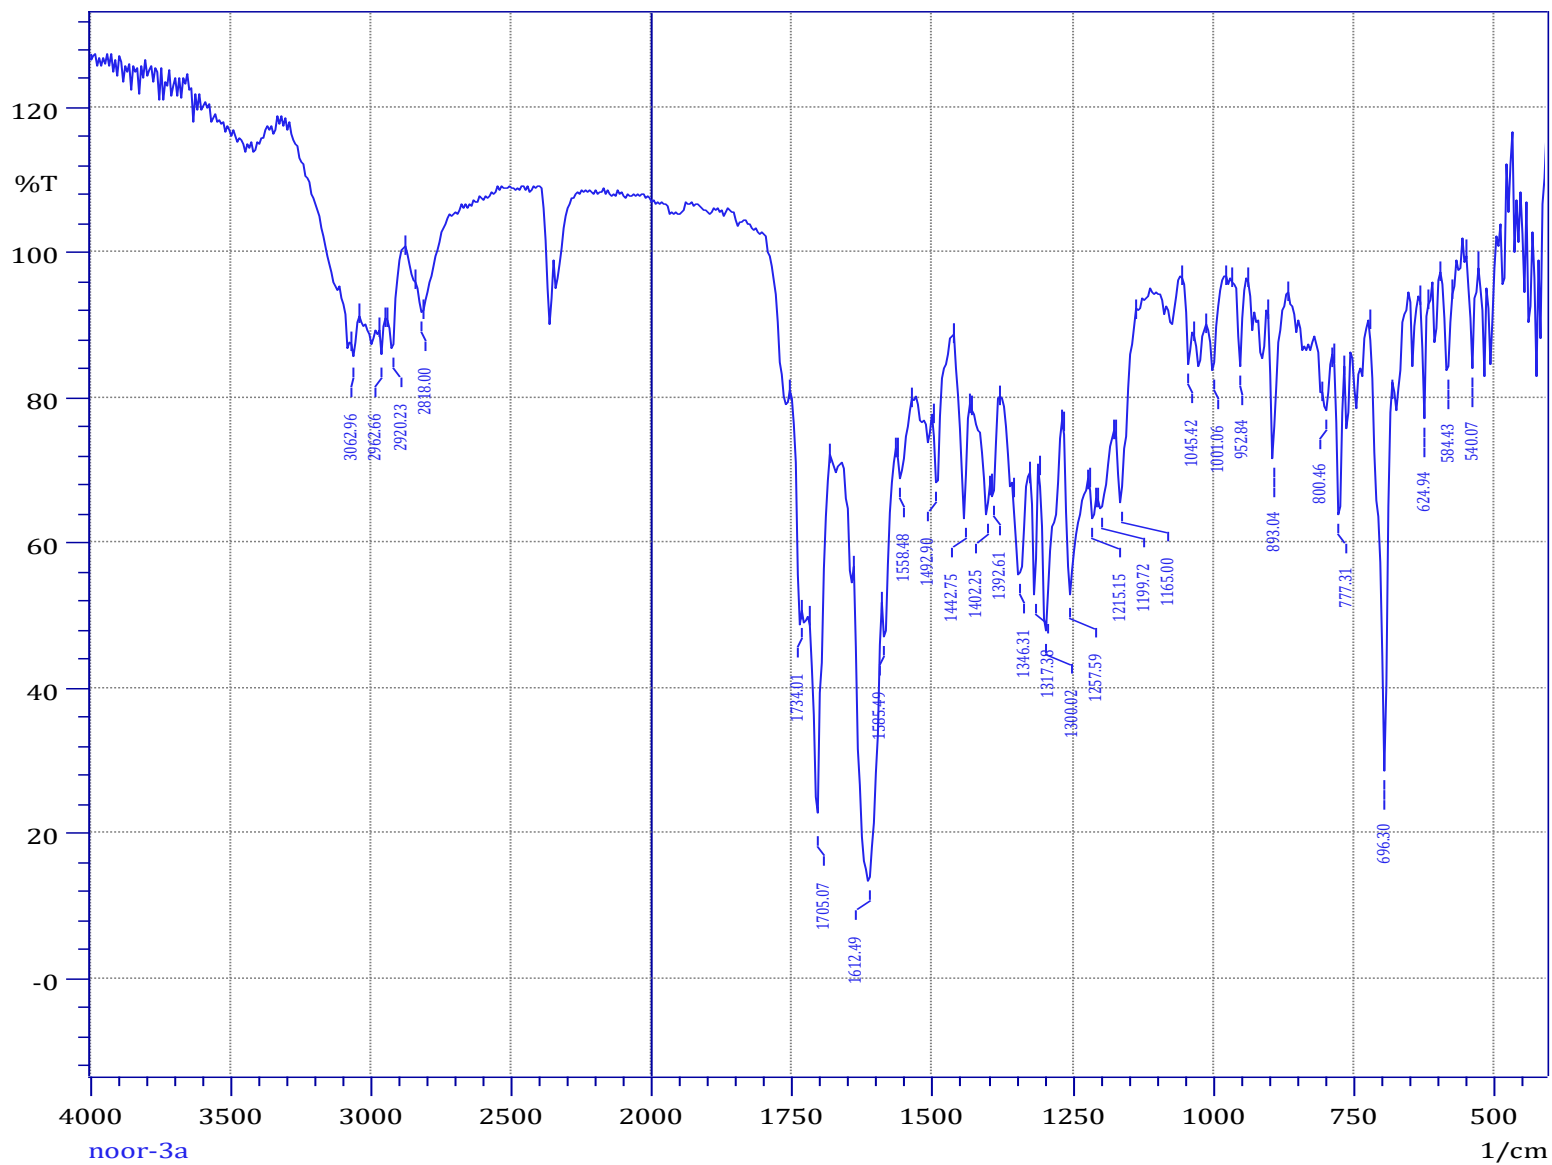

FTIR spectrum of compound ( 3a )

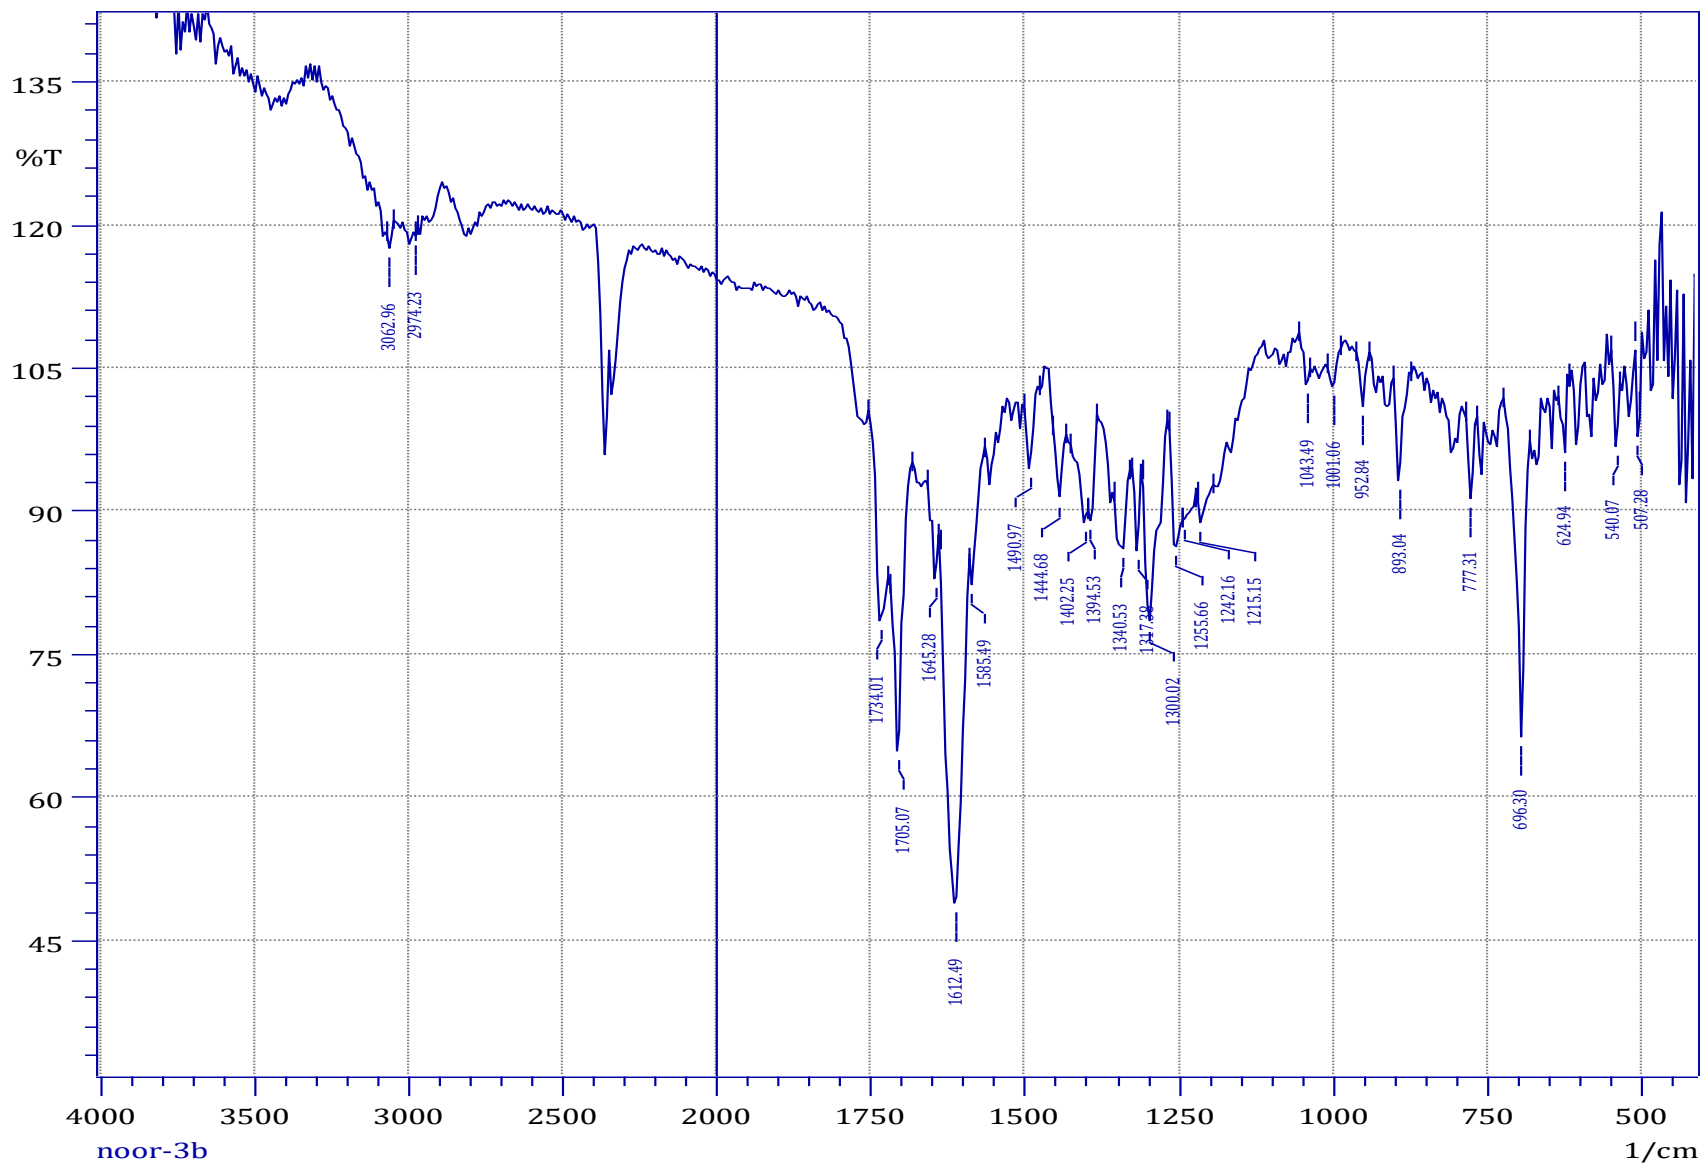

FTIR spectrum of compound ( 3b )

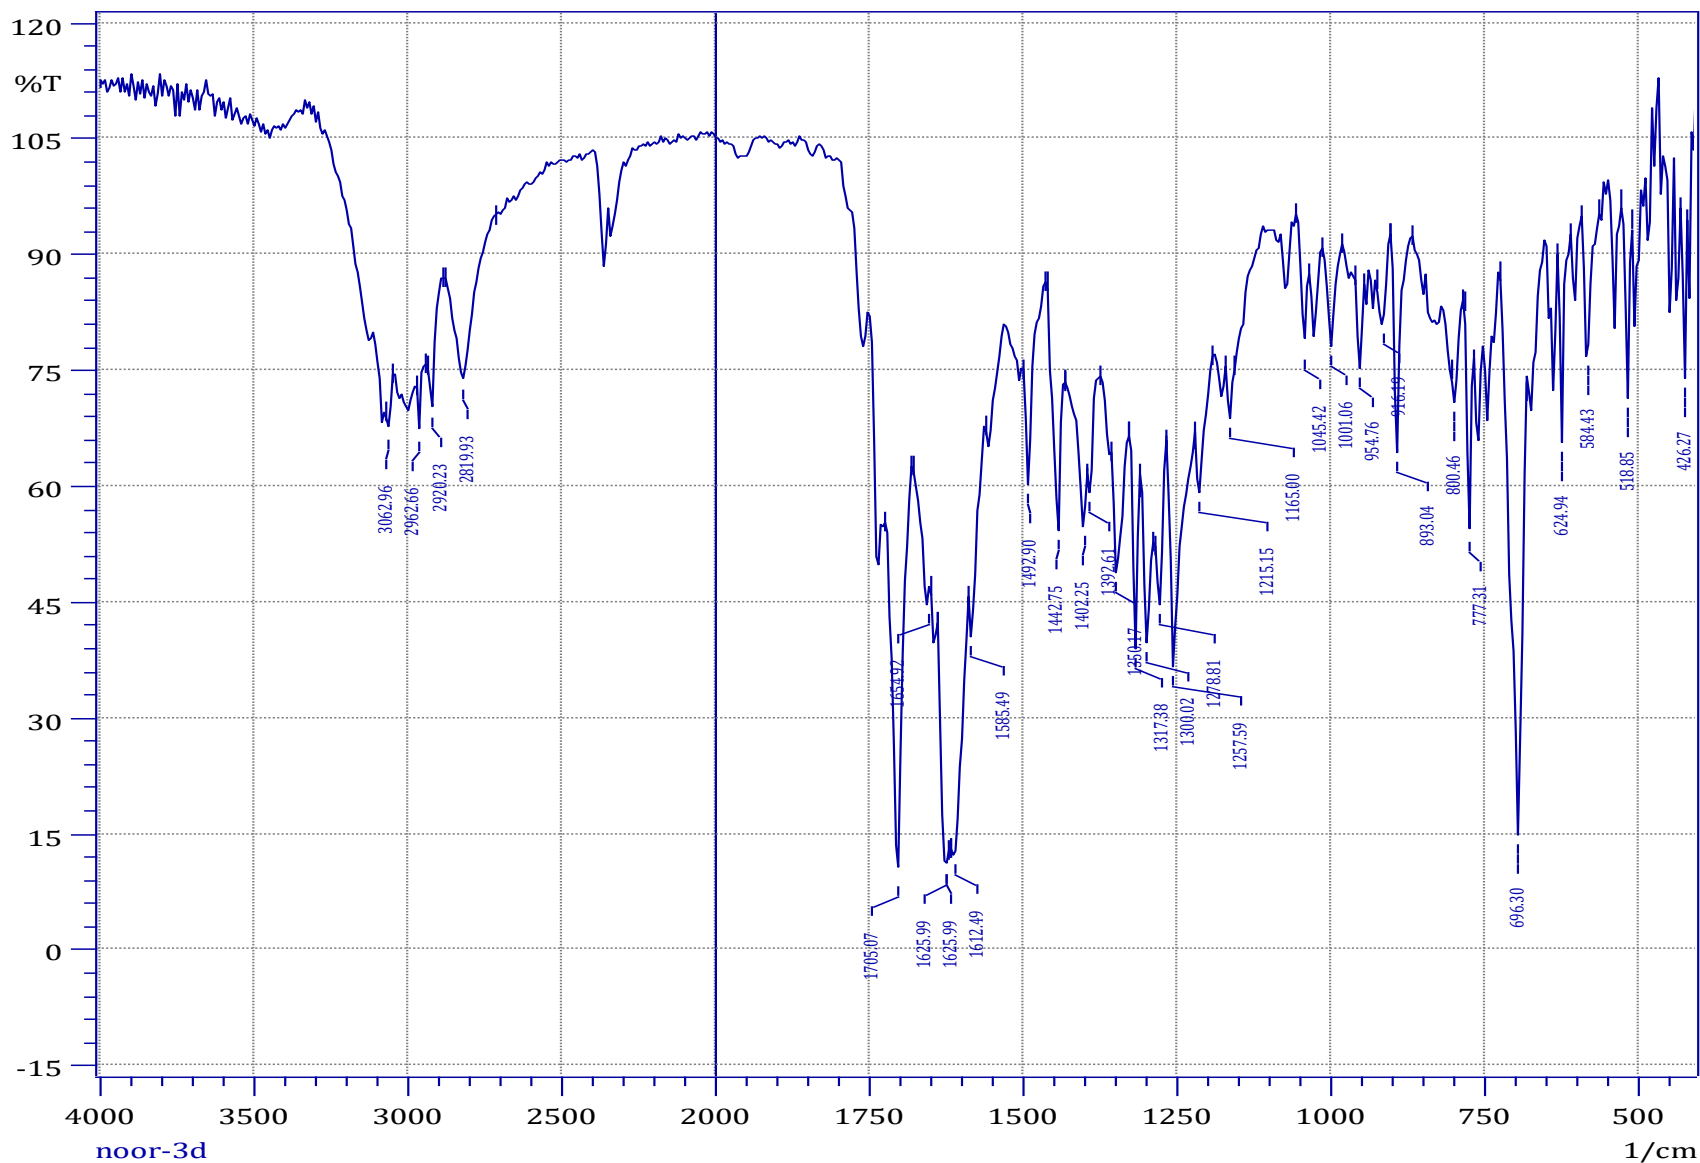

FTIR spectrum of compound (3d)

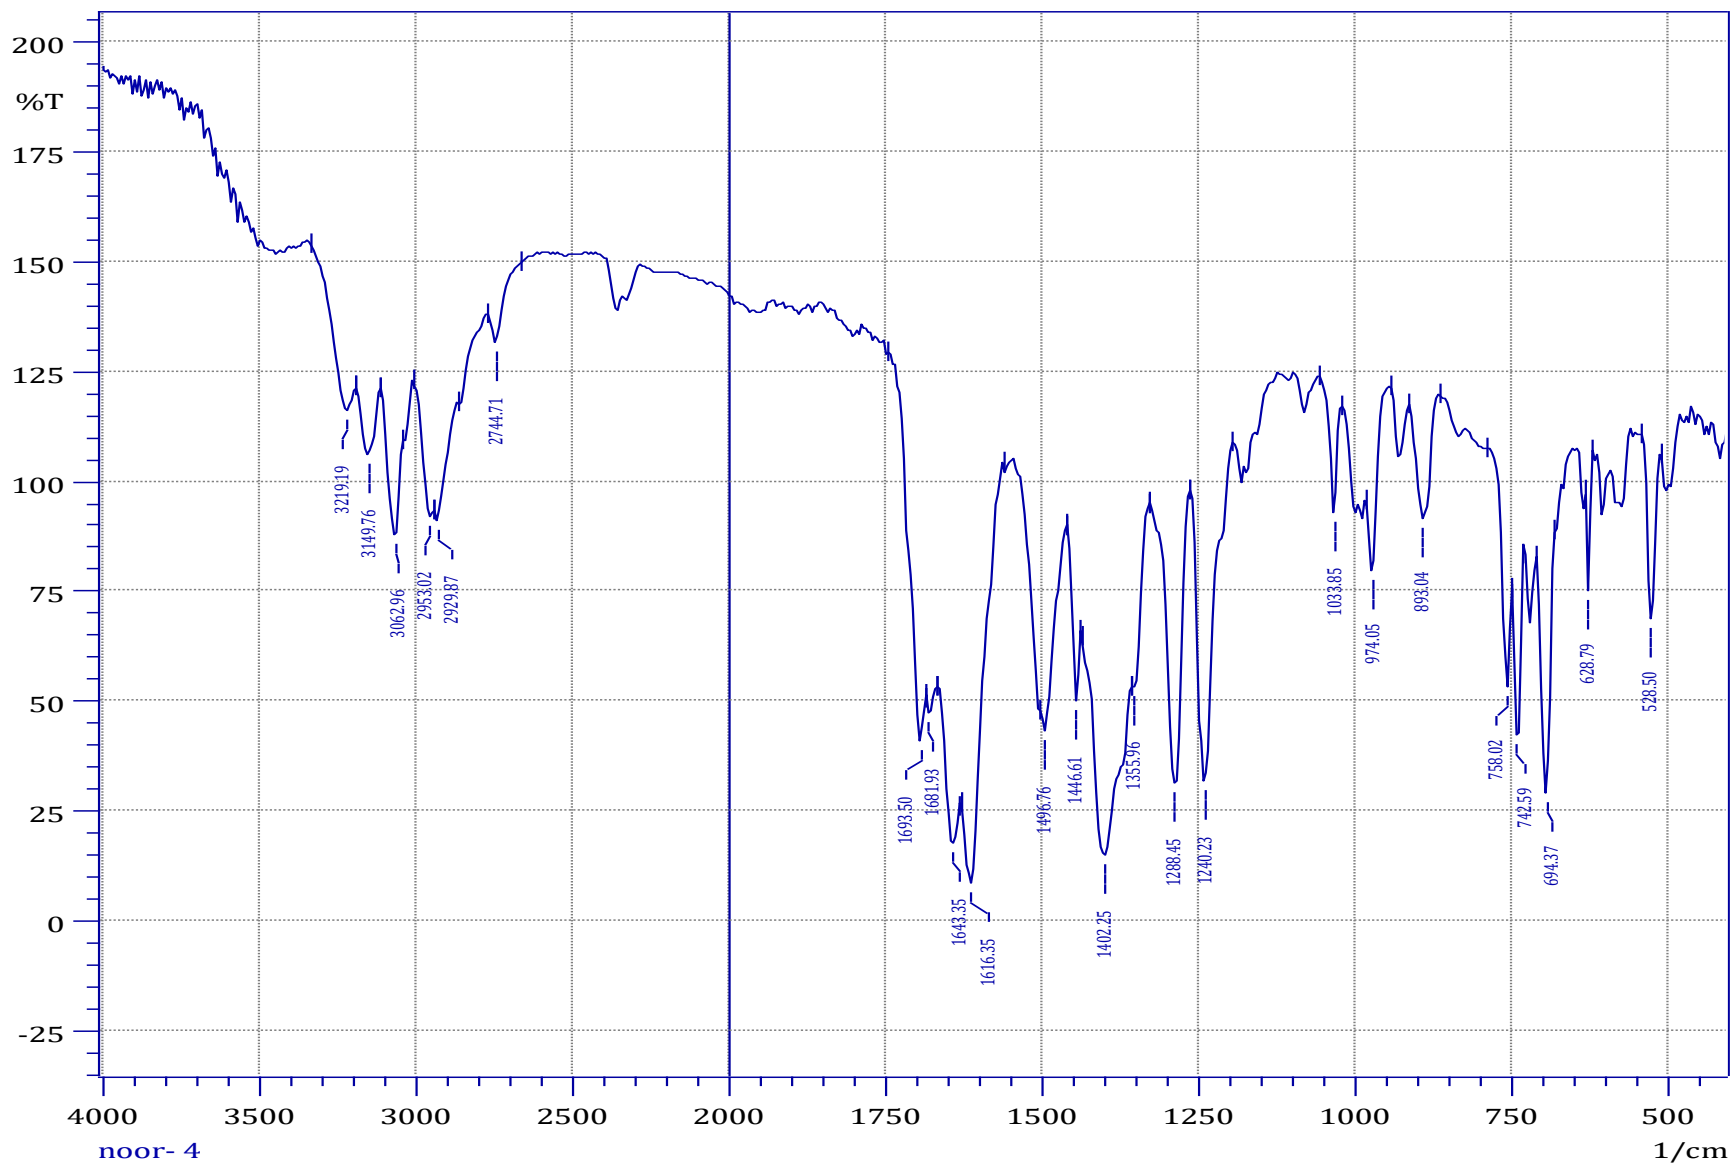

FTIR spectrum of compound ( 4 )

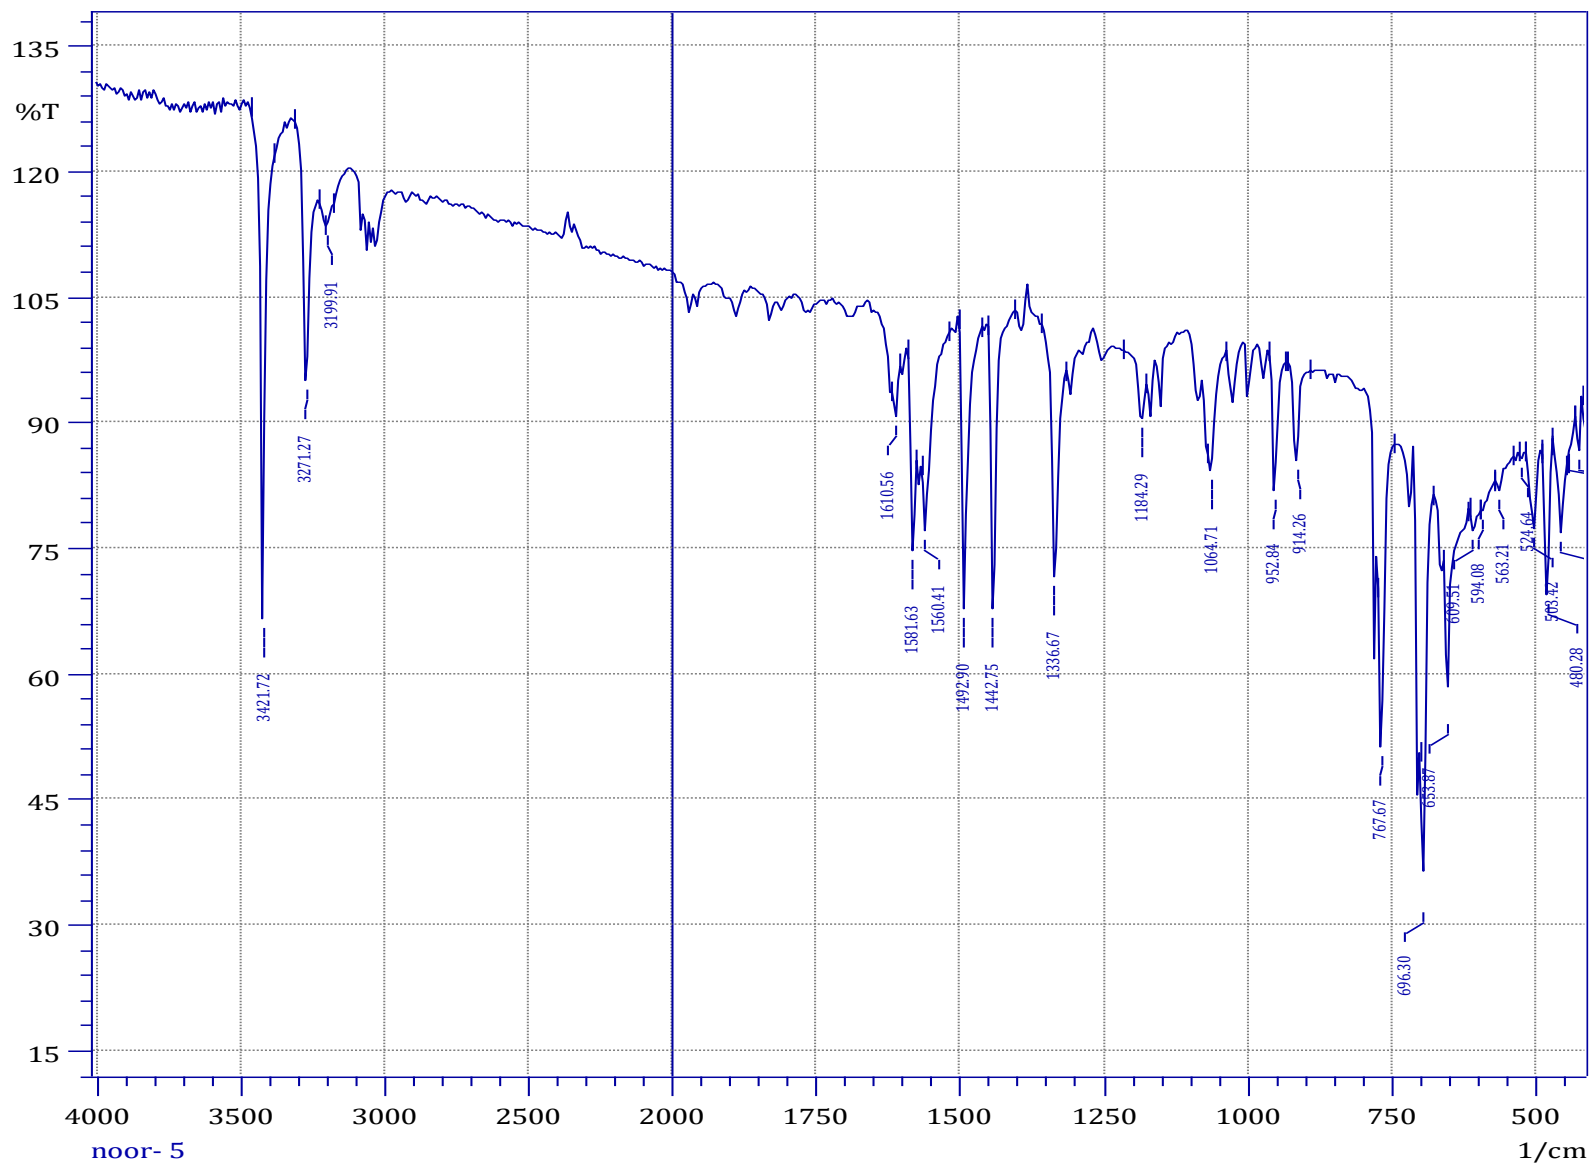

FTIR spectrum of compound ( 5 )

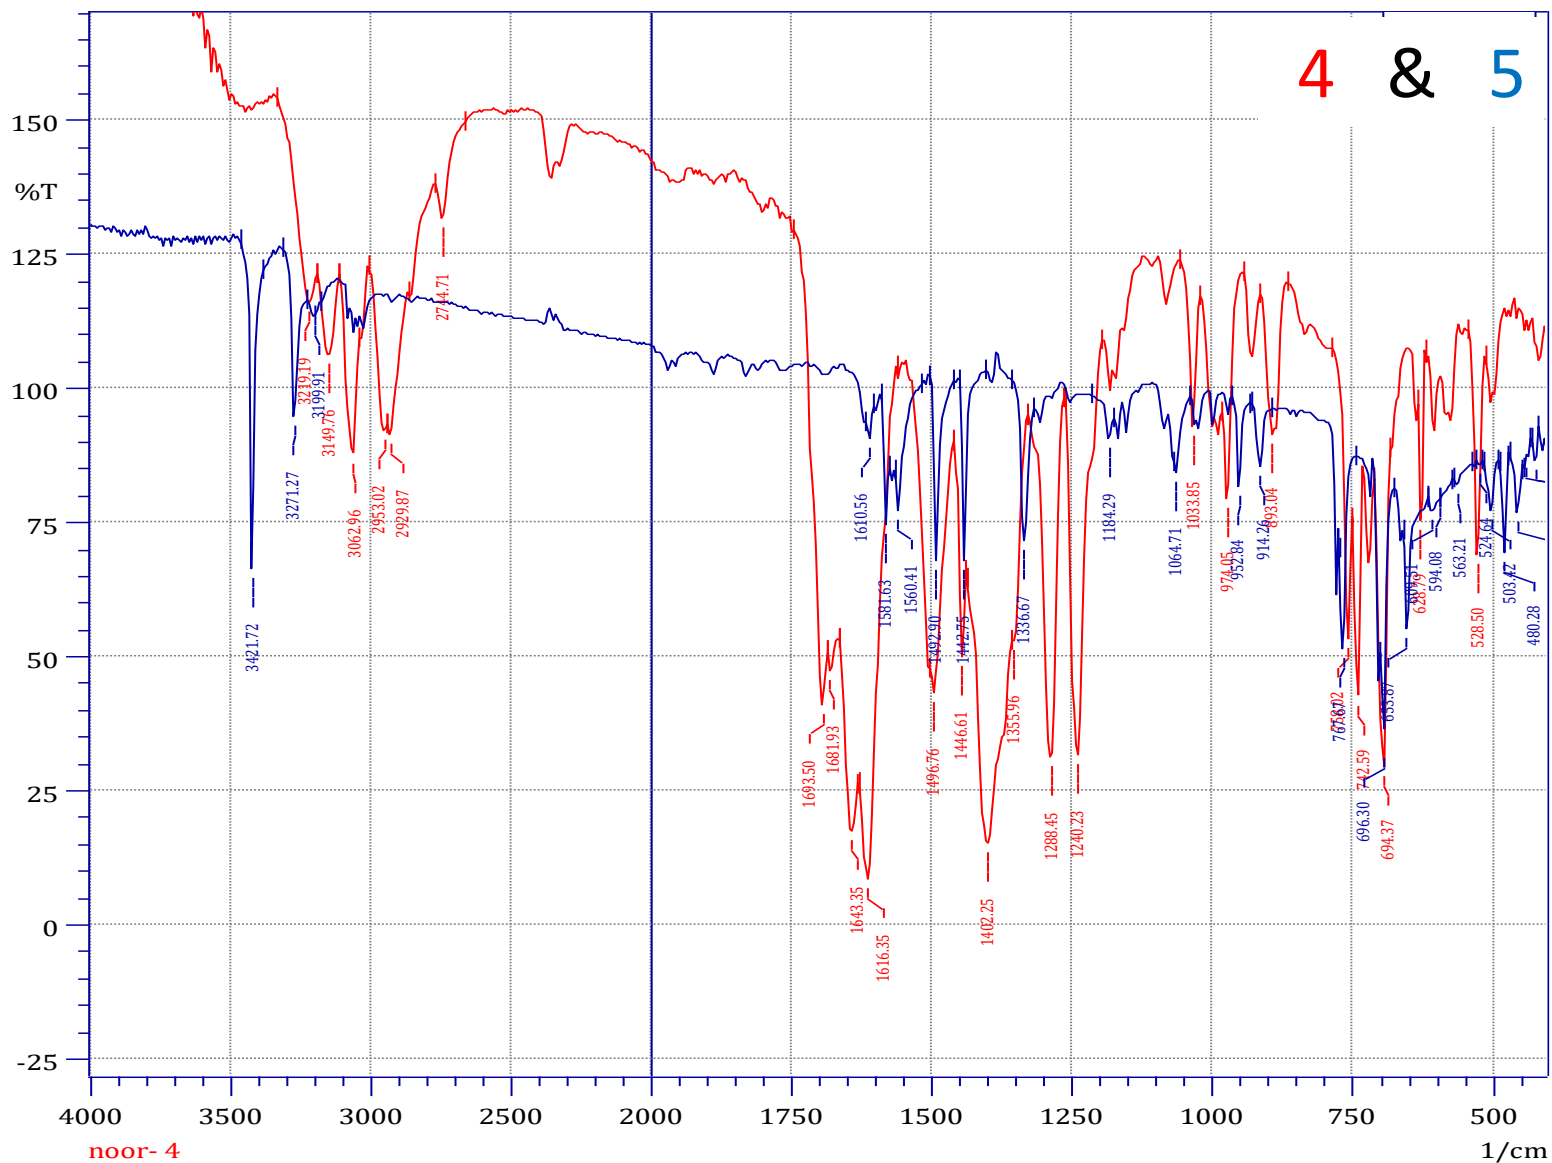

noor-4

FTIR spectra of compound (4,5)

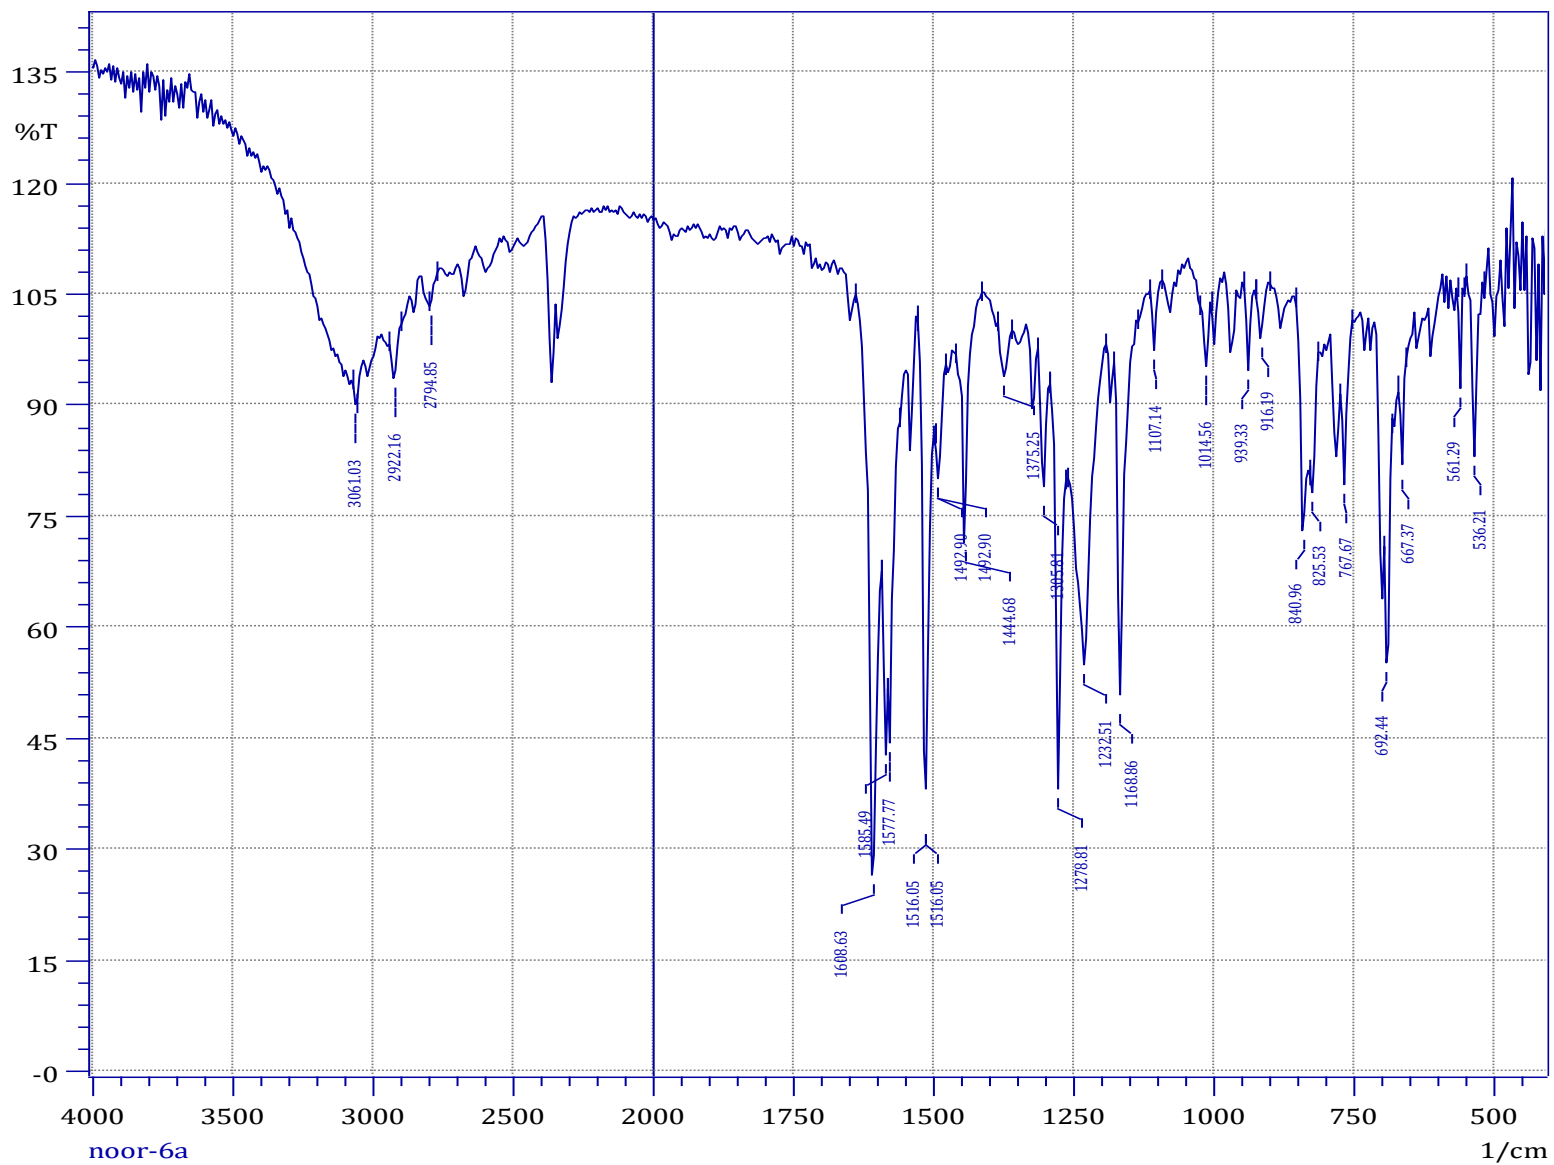

FTIR spectrum of compound ( 6a )

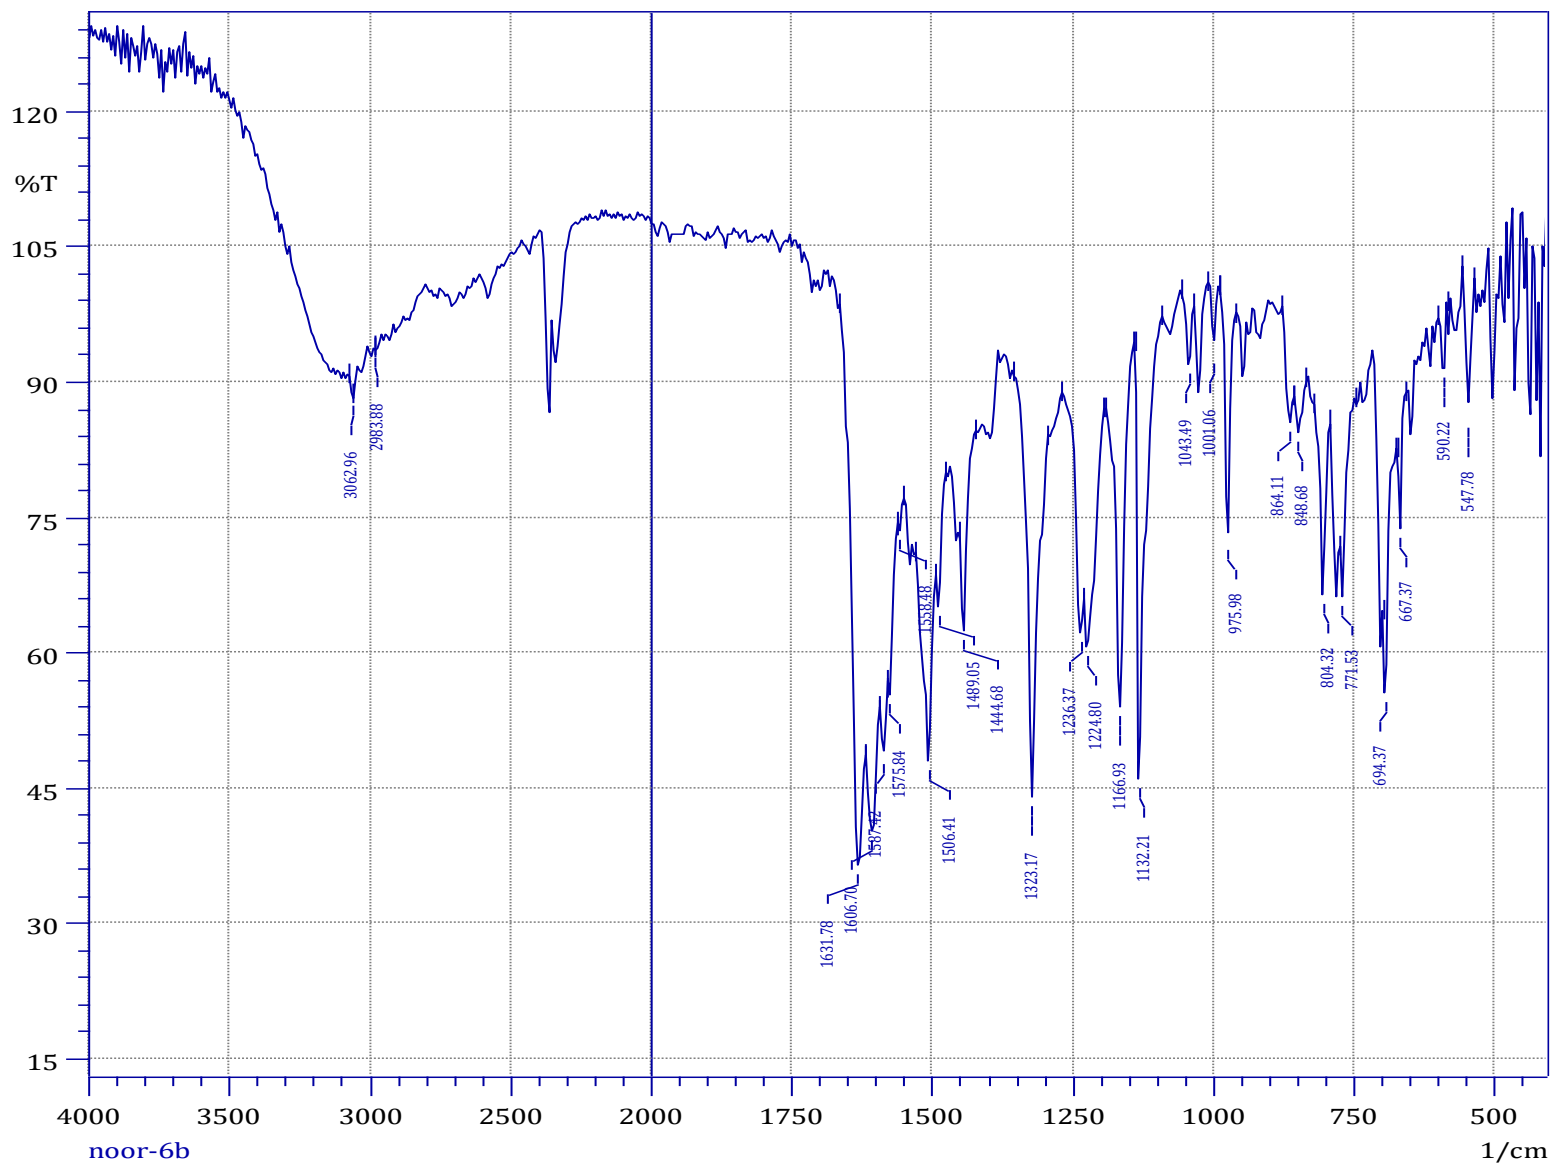

noor-6b

FTIR spectrum of compound ( 6b )
